# Supplementary material
Source: publisher figshare collection journal article supplement (https://tandf.figshare.com/ndownloader/files/36011796)
Supplement: Supplementary file 1 [file 36011796]

**Supplementary Material**

**Multi-technique approach to explore the mixed micellization behavior of promazine hydrochloride drug and cetyltrimethylammonium bromide surfactant in aqueous glycine, glycylglycine (dipeptide) and glycylglycylglycine (tripeptide) solutions**

**Table S1**

Specifications of the chemicals used.

| Compound (Name, Structure and Abbreviation) | Molecular formula /molar mass **10-3 / (kg·mol-1)** | Source | aMass fraction purity | CAS number |
| --- | --- | --- | --- | --- |
| Promazine hydrochloride (PMZ) | C17H20N2S.HCl  (320.88) | Sigma-Aldrich, Co. | ≥98% | 53-60-1 |
| Cetyltrimethylammonium bromide (CTAB) | CH3(CH2)15N(Br)(CH3)3  (364.45) | Sigma-Aldrich, Co. | ≥99% | 57-09-0 |
| Glycine (G) | C2H5NO2  (75.07) | Sisco Research Laboratories | ≥ 99% | 56-40-6 |
| Glycylglycine (GG) | C4H8N2O3  (132.12) | Sisco Research Laboratories | ≥ 99% | 556-50-3 |
| Glycylglycylglycine (GGG) | C6H11N3O4  (189.17) | Sigma-Aldrich, Co. | ≥98% | 556-33-2 |

aAs declared by the supplier

**Table S2**

Degree of ionization (*α*), experimental *CMC*, *CMC*ideal, and various thermodynamic parameters of PMZ, CTAB, and mixed (PMZ + CTAB) system at various mole fractions in water and in glycine(aq), glycylglycine(aq) and glycylglycylglycine(aq) solutions at studied temperatures, using the conductivity data.

| *T* (K) | *α* | *CMC*  **10-3**  (**mol·kg-1**) | *CMC*ideal **10-3**  (**mol·kg-1**) | Δ*G*°m  **(kJ·mol−1)** | Δ*H*°m  **(kJ·mol−1)** | Δ*S*°m  **(J·K−1·mol−1)** |
| --- | --- | --- | --- | --- | --- | --- |
| PMZ | | | | | | |
| *m*B = 0.00 **mol·kg−1** | | | | | | |
| 298.15 | 0.58 | 34.83 | - | -25.96 | -13.64 | 41.31 |
| 308.15 | 0.59 | 35.67 | - | -26.56 | 4.45 | 100.63 |
| 318.15 | 0.60 | 32.33 | - | -27.59 | 18.85 | 145.96 |
| *m*B = 0.025 **mol·kg−1** G | | | | | | |
| 298.15 | 0.62 | 30.83 | - | -25.65 | -12.24 | 44.96 |
| 308.15 | 0.66 | 32.50 | - | -25.56 | 3.17 | 93.24 |
| 318.15 | 0.75 | 29.00 | - | -24.99 | 42.08 | 210.81 |
| *m*B = 0.05 **mol·kg−1** G | | | | | | |
| 298.15 | 0.63 | 29.67 | - | -25.59 | -10.13 | 51.87 |
| 308.15 | 0.67 | 31.17 | - | -25.51 | 5.25 | 99.82 |
| 318.15 | 0.77 | 27.50 | - | -24.76 | 34.16 | 185.21 |
| *m*B = 0.10 **mol·kg−1** G | | | | | | |
| 298.15 | 0.64 | 28.50 | - | -25.54 | -10.05 | 51.95 |
| 308.15 | 0.68 | 29.83 | - | -25.46 | 3.13 | 92.78 |
| 318.15 | 0.78 | 26.83 | - | -24.64 | 65.71 | 283.99 |
| *m*B = 0.025 **mol·kg−1** GG | | | | | | |
| 298.15 | 0.62 | 29.33 | - | -25.82 | -17.34 | 28.43 |
| 308.15 | 0.66 | 31.83 | - | -25.63 | 4.23 | 96.90 |
| 318.15 | 0.76 | 27.00 | - | -25.03 | 34.44 | 186.90 |
| *m*B = 0.05 **mol·kg−1** GG | | | | | | |
| 298.15 | 0.63 | 28.83 | - | -25.69 | -15.19 | 35.21 |
| 308.15 | 0.67 | 30.67 | - | -25.56 | 7.35 | 106.81 |
| 318.15 | 0.77 | 26.17 | - | -24.93 | 33.12 | 182.46 |
| *m*B = 0.10 **mol·kg−1** GG | | | | | | |
| 298.15 | 0.64 | 27.33 | - | -25.68 | -16.08 | 32.19 |
| 308.15 | 0.68 | 29.33 | - | -25.52 | 6.25 | 103.12 |
| 318.15 | 0.78 | 25.17 | - | -24.85 | 33.88 | 184.60 |
| *m*B = 0.025 **mol·kg−1** GGG | | | | | | |
| 298.15 | 0.63 | 26.83 | - | -25.93 | -24.30 | 5.47 |
| 308.15 | 0.68 | 27.33 | - | -25.76 | 8.34 | 110.65 |
| 318.15 | 0.76 | 22.17 | - | -25.67 | 104.36 | 408.70 |
| *m*B = 0.05 **mol·kg−1** GGG | | | | | | |
| 298.15 | 0.65 | 25.33 | - | -25.75 | -15.96 | 32.81 |
| 308.15 | 0.69 | 26.50 | - | -25.67 | 7.24 | 106.80 |
| 318.15 | 0.77 | 21.67 | - | -25.54 | 47.62 | 229.94 |
| *m*B = 0.10 **mol·kg−1** GGG | | | | | | |
| 298.15 | 0.67 | 22.67 | - | -25.73 | -23.59 | 7.17 |
| 308.15 | 0.70 | 25.33 | - | -25.62 | 8.21 | 109.80 |
| 318.15 | 0.80 | 19.83 | - | -25.20 | 108.06 | 418.85 |
| CTAB | | | | | | |
| *m*B = 0.00 **mol·kg−1** | | | | | | |
| 298.15 | 0.31 | 0.97 | - | -45.89 | -13.74 | 107.83 |
| 308.15 | 0.34 | 1.08 | - | -46.14 | -14.42 | 102.94 |
| 318.15 | 0.37 | 1.22 | - | -46.24 | -15.09 | 97.92 |
| *m*B = 0.025 **mol·kg−1** G | | | | | | |
| 298.15 | 0.30 | 0.91 | - | -46.46 | -12.56 | 113.68 |
| 308.15 | 0.35 | 1.01 | - | -46.16 | -13.03 | 107.53 |
| 318.15 | 0.39 | 1.11 | - | -46.10 | -13.55 | 102.32 |
| *m*B = 0.05 **mol·kg−1** G | | | | | | |
| 298.15 | 0.30 | 0.89 | - | -46.58 | -12.58 | 114.06 |
| 308.15 | 0.34 | 0.99 | - | -46.51 | -13.11 | 108.41 |
| 318.15 | 0.38 | 1.09 | - | -46.46 | -13.64 | 103.16 |
| *m*B = 0.10 **mol·kg−1**G | | | | | | |
| 298.15 | 0.27 | 0.85 | - | -47.55 | -12.79 | 116.60 |
| 308.15 | 0.34 | 0.93 | - | -46.76 | -13.11 | 109.21 |
| 318.15 | 0.38 | 1.04 | - | -46.65 | -13.63 | 103.79 |
| *m*B = 0.025 **mol·kg−1** GG | | | | | | |
| 298.15 | 0.31 | 0.89 | - | -46.26 | -12.49 | 113.28 |
| 308.15 | 0.38 | 0.98 | - | -45.44 | -12.79 | 105.95 |
| 318.15 | 0.42 | 1.09 | - | -45.28 | -13.30 | 100.54 |
| *m*B = 0.05 **mol·kg−1** GG | | | | | | |
| 298.15 | 0.31 | 0.86 | - | -46.40 | -12.49 | 113.72 |
| 308.15 | 0.38 | 0.95 | - | -45.56 | -12.79 | 106.34 |
| 318.15 | 0.42 | 1.07 | - | -45.39 | -13.30 | 100.88 |
| *m*B = 0.10 **mol·kg−1** GG | | | | | | |
| 298.15 | 0.31 | 0.83 | - | -46.53 | -8.74 | 126.75 |
| 308.15 | 0.37 | 0.89 | - | -46.09 | -9.01 | 120.34 |
| 318.15 | 0.43 | 0.97 | - | -45.49 | -9.25 | 113.91 |
| *m*B = 0.025 **mol·kg−1** GGG | | | | | | |
| 298.15 | 0.31 | 0.88 | - | -46.32 | -11.24 | 117.64 |
| 308.15 | 0.36 | 0.97 | - | -46.05 | -11.65 | 111.62 |
| 318.15 | 0.42 | 1.06 | - | -45.41 | -11.97 | 105.13 |
| *m*B = 0.05 **mol·kg−1** GGG | | | | | | |
| 298.15 | 0.31 | 0.85 | - | -46.45 | -12.49 | 113.90 |
| 308.15 | 0.36 | 0.94 | - | -46.15 | -12.95 | 107.73 |
| 318.15 | 0.42 | 1.05 | - | -45.46 | -13.30 | 101.09 |
| *m*B = 0.10 **mol·kg−1** GGG | | | | | | |
| 298.15 | 0.31 | 0.82 | - | -46.59 | -6.25 | 135.32 |
| 308.15 | 0.37 | 0.87 | - | -46.20 | -6.43 | 129.04 |
| 318.15 | 0.43 | 0.92 | - | -45.71 | -6.61 | 122.91 |
| *α*PMZ = 0.2 | | | | | | |
| *m*B = 0.00 **mol·kg−1** | | | | | | |
| 298.15 | 0.35 | 1.14 | 1.21 | -44.16 | -9.76 | 115.38 |
| 308.15 | 0.39 | 1.24 | 1.34 | -44.19 | -10.17 | 110.41 |
| 318.15 | 0.42 | 1.35 | 1.51 | -44.39 | -10.64 | 106.10 |
| *m*B = 0.025 **mol·kg−1** G | | | | | | |
| 298.15 | 0.34 | 1.10 | 1.12 | -44.55 | -11.04 | 112.39 |
| 308.15 | 0.38 | 1.22 | 1.25 | -44.51 | -11.51 | 107.10 |
| 318.15 | 0.42 | 1.33 | 1.37 | -44.46 | -11.97 | 102.13 |
| *m*B = 0.05 **mol·kg−1** G | | | | | | |
| 298.15 | 0.32 | 1.09 | 1.10 | -45.14 | -8.69 | 122.25 |
| 308.15 | 0.37 | 1.18 | 1.23 | -44.93 | -9.01 | 116.58 |
| 318.15 | 0.42 | 1.26 | 1.35 | -44.68 | -9.31 | 111.19 |
| *m*B = 0.10 **mol·kg−1** G | | | | | | |
| 298.15 | 0.31 | 1.04 | 1.05 | -45.60 | -9.99 | 119.43 |
| 308.15 | 0.36 | 1.15 | 1.16 | -45.33 | -10.36 | 113.50 |
| 318.15 | 0.41 | 1.24 | 1.29 | -45.04 | -10.70 | 107.91 |
| *m*B = 0.025 **mol·kg−1** GG | | | | | | |
| 298.15 | 0.36 | 1.07 | 1.10 | -44.14 | -8.48 | 119.60 |
| 308.15 | 0.41 | 1.16 | 1.21 | -43.90 | -8.79 | 113.96 |
| 318.15 | 0.46 | 1.24 | 1.35 | -43.62 | -9.07 | 108.59 |
| *m*B = 0.05 **mol·kg−1** GG | | | | | | |
| 298.15 | 0.36 | 1.06 | 1.07 | -44.20 | -4.85 | 131.97 |
| 308.15 | 0.41 | 1.10 | 1.18 | -44.10 | -5.02 | 126.83 |
| 318.15 | 0.47 | 1.15 | 1.32 | -43.64 | -5.15 | 120.98 |
| *m*B = 0.10 **mol·kg−1** GG | | | | | | |
| 298.15 | 0.36 | 1.02 | 1.03 | -44.33 | -3.64 | 136.50 |
| 308.15 | 0.41 | 1.06 | 1.11 | -44.29 | -3.77 | 131.50 |
| 318.15 | 0.47 | 1.09 | 1.20 | -43.87 | -3.86 | 125.74 |
| *m*B = 0.025 **mol·kg−1** GGG | | | | | | |
| 298.15 | 0.36 | 1.06 | 1.09 | -44.17 | -8.48 | 119.69 |
| 308.15 | 0.41 | 1.14 | 1.20 | -43.98 | -8.79 | 114.20 |
| 318.15 | 0.46 | 1.23 | 1.31 | -43.67 | -9.07 | 108.73 |
| *m*B = 0.05 **mol·kg−1** GGG | | | | | | |
| 298.15 | 0.35 | 1.04 | 1.05 | -44.52 | -3.66 | 137.05 |
| 308.15 | 0.41 | 1.08 | 1.17 | -44.18 | -3.77 | 131.15 |
| 318.15 | 0.47 | 1.13 | 1.30 | -43.74 | -3.86 | 125.34 |
| *m*B = 0.10 **mol·kg−1** GGG | | | | | | |
| 298.15 | 0.35 | 1.01 | 1.02 | -44.66 | -3.66 | 137.52 |
| 308.15 | 0.41 | 1.04 | 1.08 | -44.34 | -3.77 | 131.67 |
| 318.15 | 0.46 | 1.08 | 1.14 | -44.21 | -3.89 | 126.73 |
| *α*PMZ = 0.4 | | | | | | |
| *m*B = 0.00 **mol·kg−1** | | | | | | |
| 298.15 | 0.37 | 1.53 | 1.59 | -42.44 | -6.02 | 122.14 |
| 308.15 | 0.40 | 1.61 | 1.76 | -42.84 | -6.32 | 118.52 |
| 318.15 | 0.43 | 1.70 | 1.99 | -43.17 | -6.61 | 114.92 |
| *m*B = 0.025 **mol·kg−1** G | | | | | | |
| 298.15 | 0.33 | 1.47 | 1.48 | -43.64 | -8.64 | 117.40 |
| 308.15 | 0.38 | 1.58 | 1.64 | -43.44 | -8.95 | 111.91 |
| 318.15 | 0.43 | 1.69 | 1.80 | -43.19 | -9.25 | 106.68 |
| *m*B = 0.05 **mol·kg−1** G | | | | | | |
| 298.15 | 0.32 | 1.43 | 1.45 | -44.00 | -7.45 | 122.59 |
| 308.15 | 0.37 | 1.53 | 1.61 | -43.86 | -7.72 | 117.29 |
| 318.15 | 0.42 | 1.63 | 1.78 | -43.63 | -7.98 | 112.07 |
| *m*B = 0.10 **mol·kg−1** G | | | | | | |
| 298.15 | 0.30 | 1.35 | 1.39 | -44.78 | -8.80 | 120.68 |
| 308.15 | 0.36 | 1.46 | 1.52 | -44.32 | -9.06 | 114.42 |
| 318.15 | 0.41 | 1.58 | 1.69 | -44.04 | -9.37 | 108.98 |
| *m*B = 0.025 **mol·kg−1** GG | | | | | | |
| 298.15 | 0.39 | 1.43 | 1.45 | -42.17 | -4.76 | 125.46 |
| 308.15 | 0.44 | 1.50 | 1.60 | -42.05 | -4.93 | 120.46 |
| 318.15 | 0.49 | 1.57 | 1.78 | -41.85 | -5.08 | 115.55 |
| *m*B = 0.05 **mol·kg−1** GG | | | | | | |
| 298.15 | 0.40 | 1.32 | 1.41 | -42.24 | -9.46 | 109.95 |
| 308.15 | 0.44 | 1.43 | 1.55 | -42.23 | -9.85 | 105.06 |
| 318.15 | 0.50 | 1.55 | 1.73 | -41.61 | -10.10 | 99.05 |
| *m*B = 0.10 **mol·kg−1** GG | | | | | | |
| 298.15 | 0.39 | 1.30 | 1.36 | -42.56 | -8.33 | 114.80 |
| 308.15 | 0.44 | 1.41 | 1.46 | -42.30 | -8.62 | 109.29 |
| 318.15 | 0.50 | 1.52 | 1.58 | -41.70 | -8.84 | 103.29 |
| *m*B = 0.025 **mol·kg−1** GGG | | | | | | |
| 298.15 | 0.38 | 1.35 | 1.43 | -42.67 | -5.99 | 123.03 |
| 308.15 | 0.44 | 1.43 | 1.57 | -42.23 | -6.16 | 117.05 |
| 318.15 | 0.49 | 1.52 | 1.71 | -41.98 | -6.35 | 111.96 |
| *m*B = 0.05 **mol·kg−1** GGG | | | | | | |
| 298.15 | 0.38 | 1.31 | 1.39 | -42.80 | -3.59 | 131.49 |
| 308.15 | 0.43 | 1.35 | 1.54 | -42.74 | -3.72 | 126.63 |
| 318.15 | 0.50 | 1.39 | 1.70 | -42.04 | -3.79 | 120.23 |
| *m*B = 0.10 **mol·kg−1** GGG | | | | | | |
| 298.15 | 0.38 | 1.23 | 1.34 | -43.03 | -5.99 | 124.25 |
| 308.15 | 0.43 | 1.30 | 1.42 | -42.89 | -6.20 | 119.08 |
| 318.15 | 0.50 | 1.37 | 1.49 | -42.11 | -6.31 | 112.52 |
| *α*PMZ = 0.6 | | | | | | |
| *m*B = 0.00 **mol·kg−1** | | | | | | |
| 298.15 | 0.39 | 2.06 | 2.33 | -40.73 | -11.90 | 96.69 |
| 308.15 | 0.42 | 2.30 | 2.58 | -40.85 | -12.47 | 92.10 |
| 318.15 | 0.45 | 2.56 | 2.89 | -40.95 | -13.04 | 87.70 |
| *m*B = 0.025 **mol·kg−1** G | | | | | | |
| 298.15 | 0.37 | 1.98 | 2.17 | -41.39 | -8.43 | 110.54 |
| 308.15 | 0.42 | 2.13 | 2.40 | -41.16 | -8.73 | 105.23 |
| 318.15 | 0.46 | 2.31 | 2.61 | -41.09 | -9.07 | 100.65 |
| *m*B = 0.05 **mol·kg−1** G | | | | | | |
| 298.15 | 0.36 | 1.83 | 2.13 | -41.95 | -10.91 | 104.12 |
| 308.15 | 0.41 | 2.00 | 2.36 | -41.68 | -11.30 | 98.60 |
| 318.15 | 0.45 | 2.20 | 2.58 | -41.56 | -11.74 | 93.74 |
| *m*B = 0.10 **mol·kg−1** G | | | | | | |
| 298.15 | 0.35 | 1.82 | 2.03 | -42.23 | -9.76 | 108.93 |
| 308.15 | 0.40 | 1.99 | 2.23 | -41.97 | -10.11 | 103.40 |
| 318.15 | 0.45 | 2.14 | 2.45 | -41.67 | -10.44 | 98.17 |
| *m*B = 0.025 **mol·kg−1** GG | | | | | | |
| 298.15 | 0.39 | 1.92 | 2.13 | -41.00 | -8.33 | 109.56 |
| 308.15 | 0.44 | 2.08 | 2.34 | -40.74 | -8.62 | 104.24 |
| 318.15 | 0.48 | 2.23 | 2.58 | -40.70 | -8.95 | 99.77 |
| *m*B = 0.05 **mol·kg−1** GG | | | | | | |
| 298.15 | 0.38 | 1.81 | 2.06 | -41.49 | -7.18 | 115.06 |
| 308.15 | 0.45 | 1.93 | 2.27 | -40.77 | -7.34 | 108.47 |
| 318.15 | 0.49 | 2.08 | 2.51 | -40.72 | -7.62 | 104.02 |
| *m*B = 0.10 **mol·kg−1** GG | | | | | | |
| 298.15 | 0.37 | 1.78 | 1.99 | -41.82 | -7.23 | 116.02 |
| 308.15 | 0.45 | 1.89 | 2.14 | -40.86 | -7.34 | 108.77 |
| 318.15 | 0.49 | 2.01 | 2.30 | -40.85 | -7.62 | 104.43 |
| *m*B = 0.025 **mol·kg−1** GGG | | | | | | |
| 298.15 | 0.39 | 1.89 | 2.09 | -41.07 | -5.95 | 117.78 |
| 308.15 | 0.44 | 2.00 | 2.29 | -40.90 | -6.16 | 112.73 |
| 318.15 | 0.49 | 2.12 | 2.48 | -40.63 | -6.35 | 107.75 |
| *m*B = 0.05 **mol·kg−1** GGG | | | | | | |
| 298.15 | 0.38 | 1.79 | 2.02 | -41.54 | -7.18 | 115.23 |
| 308.15 | 0.44 | 1.91 | 2.24 | -41.08 | -7.39 | 109.32 |
| 318.15 | 0.49 | 2.06 | 2.45 | -40.76 | -7.62 | 104.15 |
| *m*B = 0.10 **mol·kg−1** GGG | | | | | | |
| 298.15 | 0.37 | 1.66 | 1.95 | -42.11 | -9.64 | 108.91 |
| 308.15 | 0.43 | 1.79 | 2.07 | -41.61 | -9.92 | 102.84 |
| 318.15 | 0.48 | 1.94 | 2.16 | -41.25 | -10.23 | 97.50 |
| *α*PMZ = 0.8 | | | | | | |
| *m*B = 0.00 **mol·kg−1** | | | | | | |
| 298.15 | 0.40 | 3.58 | 4.37 | -38.28 | -11.83 | 88.72 |
| 308.15 | 0.43 | 4.00 | 4.82 | -38.37 | -12.40 | 84.29 |
| 318.15 | 0.46 | 4.44 | 5.31 | -38.43 | -12.96 | 80.05 |
| *m*B = 0.025 **mol·kg−1** G | | | | | | |
| 298.15 | 0.36 | 3.44 | 4.05 | -39.39 | -10.91 | 95.52 |
| 308.15 | 0.40 | 3.78 | 4.47 | -39.34 | -11.37 | 90.76 |
| 318.15 | 0.44 | 4.18 | 4.80 | -39.18 | -11.82 | 86.02 |
| *m*B = 0.05 **mol·kg−1** G | | | | | | |
| 298.15 | 0.36 | 3.27 | 3.97 | -39.60 | -13.33 | 88.11 |
| 308.15 | 0.40 | 3.64 | 4.39 | -39.49 | -13.90 | 83.04 |
| 318.15 | 0.44 | 4.09 | 4.72 | -39.27 | -14.44 | 78.05 |
| *m*B = 0.10 **mol·kg−1** G | | | | | | |
| 298.15 | 0.35 | 3.11 | 3.80 | -40.04 | -12.20 | 93.41 |
| 308.15 | 0.39 | 3.44 | 4.15 | -39.96 | -12.71 | 88.44 |
| 318.15 | 0.45 | 3.80 | 4.50 | -39.32 | -13.04 | 82.59 |
| *m*B = 0.025 **mol·kg−1** GG | | | | | | |
| 298.15 | 0.39 | 3.38 | 3.96 | -38.75 | -10.71 | 94.03 |
| 308.15 | 0.43 | 3.69 | 4.35 | -38.70 | -11.16 | 89.37 |
| 318.15 | 0.47 | 4.07 | 4.71 | -38.54 | -11.59 | 84.71 |
| *m*B = 0.05 **mol·kg−1** GG | | | | | | |
| 298.15 | 0.40 | 3.02 | 3.85 | -38.95 | -13.01 | 87.00 |
| 308.15 | 0.44 | 3.40 | 4.23 | -38.78 | -13.55 | 81.87 |
| 318.15 | 0.48 | 3.80 | 4.59 | -38.56 | -14.07 | 76.97 |
| *m*B = 0.10 **mol·kg−1** GG | | | | | | |
| 298.15 | 0.40 | 2.93 | 3.71 | -39.06 | -4.73 | 115.16 |
| 308.15 | 0.45 | 3.07 | 3.99 | -38.94 | -4.89 | 110.47 |
| 318.15 | 0.50 | 3.22 | 4.21 | -38.71 | -5.05 | 105.79 |
| *m*B = 0.025 **mol·kg−1** GGG | | | | | | |
| 298.15 | 0.38 | 3.00 | 3.88 | -39.46 | -16.76 | 76.14 |
| 308.15 | 0.44 | 3.44 | 4.23 | -38.72 | -17.24 | 69.71 |
| 318.15 | 0.47 | 4.00 | 4.45 | -38.61 | -18.03 | 64.68 |
| *m*B = 0.05 **mol·kg−1** GGG | | | | | | |
| 298.15 | 0.39 | 2.71 | 3.75 | -39.62 | -10.71 | 96.98 |
| 308.15 | 0.46 | 2.98 | 4.13 | -38.80 | -10.94 | 90.41 |
| 318.15 | 0.50 | 3.29 | 4.40 | -38.63 | -11.36 | 85.70 |
| *m*B = 0.10 **mol·kg−1** GGG | | | | | | |
| 298.15 | 0.40 | 2.67 | 3.59 | -39.44 | -8.28 | 104.53 |
| 308.15 | 0.45 | 2.89 | 3.83 | -39.17 | -8.57 | 99.33 |
| 318.15 | 0.49 | 3.11 | 3.89 | -39.11 | -8.90 | 94.95 |

***m*B, molalities of glycine, glycylglycine and glycylglycylglycine.** **Standard uncertainties: u(*T*) = 0.20 K, u(*m*) = 0.04 mol·kg−1, u(*α*PMZ) = 0.26, u(*α*) = 0.05, u(*CMC* / *CMC*ideal) = 0.03 × 10-3 (mol·kg−1), u(Δ*G*0m) = 0.42 kJ·mol−1, u(Δ*H*0m) = 0.33 kJ·mol−1, and u(Δ*S*0m) = 5.67 J·K−1·mol−1 (0.95 level of confidence).**

**The error limits of various parameters are given as: (*CMC*/*CMC*ideal) = ±3%, Δ*G*0m = ±4%, Δ*H*0m = ±3%, and Δ*S*0m = ±4%, respectively.**

**Table S3**

Interaction parameter (*β*int), ideal mole fraction (*X*1ideal), activity coefficients (*f*1 and *f*2) of PMZ and CTAB respectively, and excess Gibbs free energy of mixing (∆*G*mex) in the mixed micelle at various micellar mole fractions (*X*1), at studied temperatures.

| αPMZ | *X*1 | *β*int | *X*1ideal | *f*1 | *f*2 | ∆*G*mex  **(kJ·mol-1)** |
| --- | --- | --- | --- | --- | --- | --- |
| *T* = 298.15 K | | | | | | |
| *m*B = 0.00 **mol·kg−1** | | | | | | |
| 0.2 | 0.06 | -2.51 | 0.01 | 0.109 | 0.991 | -0.35 |
| 0.4 | 0.07 | -1.62 | 0.02 | 0.246 | 0.992 | -0.26 |
| 0.6 | 0.13 | -1.72 | 0.04 | 0.272 | 0.971 | -0.48 |
| 0.8 | 0.22 | -1.62 | 0.10 | 0.374 | 0.925 | -0.69 |
| *m*B = 0.025 **mol·kg−1** G | | | | | | |
| 0.2 | 0.10 | -3.26 | 0.01 | 0.071 | 0.968 | -0.73 |
| 0.4 | 0.10 | -2.05 | 0.02 | 0.191 | 0.980 | -0.46 |
| 0.6 | 0.17 | -2.15 | 0.04 | 0.227 | 0.940 | -0.75 |
| 0.8 | 0.25 | -1.83 | 0.11 | 0.357 | 0.892 | -0.85 |
| *m*B = 0.05 **mol·kg−1** G | | | | | | |
| 0.2 | 0.10 | -3.22 | 0.01 | 0.074 | 0.97 | -0.72 |
| 0.4 | 0.12 | -2.36 | 0.02 | 0.161 | 0.97 | -0.62 |
| 0.6 | 0.15 | -1.94 | 0.04 | 0.247 | 0.96 | -0.61 |
| 0.8 | 0.22 | -1.50 | 0.11 | 0.401 | 0.93 | -0.64 |
| *m*B = 0.10 **mol·kg−1** G | | | | | | |
| 0.2 | 0.22 | -1.01 | 0.01 | 0.541 | 0.952 | -0.43 |
| 0.4 | 0.22 | -1.01 | 0.02 | 0.541 | 0.952 | -0.43 |
| 0.6 | 0.13 | -1.61 | 0.04 | 0.295 | 0.973 | -0.45 |
| 0.8 | 0.22 | -1.52 | 0.11 | 0.397 | 0.929 | -0.65 |
| *m*B = 0.025 **mol·kg−1** GG | | | | | | |
| 0.2 | 0.10 | -3.18 | 0.01 | 0.076 | 0.969 | -0.71 |
| 0.4 | 0.13 | -2.53 | 0.02 | 0.147 | 0.958 | -0.71 |
| 0.6 | 0.12 | -1.44 | 0.04 | 0.328 | 0.979 | -0.38 |
| 0.8 | 0.21 | -1.32 | 0.11 | 0.439 | 0.943 | -0.54 |
| *m*B = 0.05 **mol·kg−1** GG | | | | | | |
| 0.2 | 0.12 | -3.61 | 0.01 | 0.061 | 0.949 | -0.95 |
| 0.4 | 0.08 | -1.75 | 0.02 | 0.228 | 0.989 | -0.32 |
| 0.6 | 0.14 | -1.77 | 0.04 | 0.269 | 0.966 | -0.53 |
| 0.8 | 0.24 | -1.82 | 0.11 | 0.349 | 0.900 | -0.82 |
| *m*B = 0.10 **mol·kg−1** GG | | | | | | |
| 0.2 | 0.13 | -3.77 | 0.01 | 0.057 | 0.938 | -1.06 |
| 0.4 | 0.08 | -3.75 | 0.02 | 0.042 | 0.976 | -0.69 |
| 0.6 | 0.13 | -1.59 | 0.04 | 0.300 | 0.973 | -0.45 |
| 0.8 | 0.24 | -1.78 | 0.11 | 0.358 | 0.903 | -0.80 |
| *m*B = 0.025 **mol·kg−1** GGG | | | | | | |
| 0.2 | 0.12 | -3.51 | 0.01 | 0.066 | 0.951 | -0.92 |
| 0.4 | 0.15 | -2.78 | 0.02 | 0.134 | 0.939 | -0.88 |
| 0.6 | 0.13 | -1.49 | 0.05 | 0.325 | 0.975 | -0.42 |
| 0.8 | 0.25 | -1.83 | 0.12 | 0.358 | 0.892 | -0.85 |
| *m*B = 0.05 **mol·kg−1** GGG | | | | | | |
| 0.2 | 0.13 | -3.65 | 0.01 | 0.063 | 0.940 | -1.02 |
| 0.4 | 0.16 | -2.90 | 0.02 | 0.129 | 0.928 | -0.97 |
| 0.6 | 0.14 | -1.62 | 0.05 | 0.303 | 0.969 | -0.48 |
| 0.8 | 0.27 | -2.16 | 0.12 | 0.317 | 0.855 | -1.05 |
| *m*B = 0.10 **mol·kg−1** GGG | | | | | | |
| 0.2 | 0.02 | -0.84 | 0.01 | 0.444 | 0.999 | -0.04 |
| 0.4 | 0.09 | -1.71 | 0.02 | 0.242 | 0.986 | -0.35 |
| 0.6 | 0.16 | -1.84 | 0.05 | 0.274 | 0.954 | -0.61 |
| 0.8 | 0.27 | -1.98 | 0.13 | 0.349 | 0.866 | -0.97 |
|  |  |  |  |  |  |  |
| *T* = 308.15 K | | | | | | |
| *m*B = 0.00 **mol·kg−1** | | | | | | |
| 0.2 | 0.08 | -2.89 | 0.01 | 0.087 | 0.982 | -0.54 |
| 0.4 | 0.10 | -2.11 | 0.02 | 0.180 | 0.979 | -0.49 |
| 0.6 | 0.13 | -1.60 | 0.04 | 0.298 | 0.973 | -0.46 |
| 0.8 | 0.22 | -1.47 | 0.11 | 0.408 | 0.931 | -0.65 |
| *m*B = 0.025 **mol·kg−1** G | | | | | | |
| 0.2 | 0.25 | -1.83 | 0.01 | 0.357 | 0.892 | -0.88 |
| 0.4 | 0.05 | -1.05 | 0.02 | 0.389 | 0.997 | -0.13 |
| 0.6 | 0.13 | -1.58 | 0.04 | 0.302 | 0.974 | -0.46 |
| 0.8 | 0.21 | -1.30 | 0.11 | 0.443 | 0.944 | -0.55 |
| *m*B = 0.05 **mol·kg−1** G | | | | | | |
| 0.2 | 0.22 | -1.50 | 0.01 | 0.401 | 0.93 | -0.66 |
| 0.4 | 0.07 | -1.47 | 0.02 | 0.280 | 0.99 | -0.25 |
| 0.6 | 0.16 | -2.02 | 0.05 | 0.241 | 0.95 | -0.70 |
| 0.8 | 0.22 | -1.41 | 0.11 | 0.425 | 0.93 | -0.62 |
| *m*B = 0.10 **mol·kg−1** G | | | | | | |
| 0.2 | 0.22 | -1.52 | 0.01 | 0.397 | 0.929 | -0.67 |
| 0.4 | 0.22 | -1.52 | 0.02 | 0.397 | 0.929 | -0.67 |
| 0.6 | 0.13 | -1.56 | 0.04 | 0.308 | 0.974 | -0.45 |
| 0.8 | 0.22 | -1.43 | 0.11 | 0.419 | 0.933 | -0.63 |
| *m*B = 0.025 **mol·kg−1** GG | | | | | | |
| 0.2 | 0.05 | -2.13 | 0.01 | 0.146 | 0.995 | -0.26 |
| 0.4 | 0.09 | -1.89 | 0.02 | 0.209 | 0.985 | -0.40 |
| 0.6 | 0.13 | -1.59 | 0.04 | 0.301 | 0.974 | -0.46 |
| 0.8 | 0.21 | -1.31 | 0.11 | 0.441 | 0.944 | -0.56 |
| *m*B = 0.05 **mol·kg−1** GG | | | | | | |
| 0.2 | 0.07 | -2.63 | 0.01 | 0.103 | 0.987 | -0.44 |
| 0.4 | 0.09 | -1.90 | 0.02 | 0.208 | 0.985 | -0.40 |
| 0.6 | 0.16 | -2.04 | 0.04 | 0.236 | 0.949 | -0.70 |
| 0.8 | 0.23 | -1.61 | 0.11 | 0.386 | 0.918 | -0.73 |
| *m*B = 0.10 **mol·kg−1** GG | | | | | | |
| 0.2 | 0.12 | -3.63 | 0.01 | 0.060 | 0.949 | -0.98 |
| 0.4 | 0.13 | -2.53 | 0.02 | 0.148 | 0.958 | -0.73 |
| 0.6 | 0.14 | -1.74 | 0.04 | 0.276 | 0.966 | -0.54 |
| 0.8 | 0.24 | -1.83 | 0.11 | 0.348 | 0.900 | -0.85 |
| *m*B = 0.025 **mol·kg−1** GGG | | | | | | |
| 0.2 | 0.08 | -2.67 | 0.01 | 0.104 | 0.983 | -0.50 |
| 0.4 | 0.10 | -1.93 | 0.02 | 0.210 | 0.981 | -0.44 |
| 0.6 | 0.15 | -1.70 | 0.05 | 0.293 | 0.962 | -0.56 |
| 0.8 | 0.24 | -1.50 | 0.12 | 0.420 | 0.917 | -0.70 |
| *m*B = 0.05 **mol·kg−1** GGG | | | | | | |
| 0.2 | 0.08 | -2.69 | 0.01 | 0.102 | 0.983 | -0.51 |
| 0.4 | 0.12 | -2.29 | 0.02 | 0.170 | 0.968 | -0.62 |
| 0.6 | 0.16 | -1.85 | 0.05 | 0.270 | 0.954 | -0.64 |
| 0.8 | 0.27 | -2.06 | 0.12 | 0.333 | 0.860 | -1.04 |
| *m*B = 0.10 **mol·kg−1** GGG | | | | | | |
| 0.2 | 0.13 | -3.65 | 0.01 | 0.063 | 0.940 | -1.06 |
| 0.4 | 0.10 | -1.95 | 0.02 | 0.205 | 0.981 | -0.45 |
| 0.6 | 0.15 | -1.75 | 0.05 | 0.282 | 0.961 | -0.57 |
| 0.8 | 0.26 | -1.91 | 0.12 | 0.351 | 0.879 | -0.94 |
| *T* = 318.15 K | | | | | | |
| *m*B = 0.00 **mol·kg−1** | | | | | | |
| 0.2 | 0.10 | -3.06 | 0.01 | 0.084 | 0.970 | -0.73 |
| 0.4 | 0.14 | -2.56 | 0.02 | 0.150 | 0.951 | -0.82 |
| 0.6 | 0.14 | -1.46 | 0.05 | 0.339 | 0.972 | -0.47 |
| 0.8 | 0.23 | -1.24 | 0.13 | 0.478 | 0.936 | -0.58 |
| *m*B = 0.025 **mol·kg−1** G | | | | | | |
| 0.2 | 0.04 | -1.60 | 0.01 | 0.229 | 0.997 | -0.16 |
| 0.4 | 0.08 | -1.46 | 0.02 | 0.291 | 0.991 | -0.28 |
| 0.6 | 0.15 | -1.58 | 0.05 | 0.319 | 0.965 | -0.53 |
| 0.8 | 0.22 | -1.06 | 0.13 | 0.524 | 0.950 | -0.48 |
| *m*B = 0.05 **mol·kg−1** G | | | | | | |
| 0.2 | 0.07 | -2.35 | 0.01 | 0.131 | 0.99 | -0.40 |
| 0.4 | 0.10 | -1.78 | 0.03 | 0.237 | 0.98 | -0.42 |
| 0.6 | 0.16 | -1.71 | 0.06 | 0.300 | 0.96 | -0.61 |
| 0.8 | 0.22 | -1.01 | 0.14 | 0.541 | 0.95 | -0.46 |
| *m*B = 0.10 **mol·kg−1** G | | | | | | |
| 0.2 | 0.22 | -1.43 | 0.01 | 0.419 | 0.933 | -0.65 |
| 0.4 | 0.08 | -1.44 | 0.03 | 0.294 | 0.991 | -0.28 |
| 0.6 | 0.15 | -1.58 | 0.05 | 0.319 | 0.965 | -0.53 |
| 0.8 | 0.23 | -1.19 | 0.13 | 0.493 | 0.939 | -0.56 |
| *m*B = 0.025 **mol·kg−1** GG | | | | | | |
| 0.2 | 0.08 | -2.55 | 0.01 | 0.115 | 0.984 | -0.50 |
| 0.4 | 0.12 | -2.12 | 0.03 | 0.193 | 0.970 | -0.59 |
| 0.6 | 0.16 | -1.66 | 0.06 | 0.310 | 0.958 | -0.59 |
| 0.8 | 0.23 | -1.09 | 0.14 | 0.524 | 0.944 | -0.51 |
| *m*B = 0.05 **mol·kg−1** GG | | | | | | |
| 0.2 | 0.11 | -3.19 | 0.01 | 0.080 | 0.962 | -0.83 |
| 0.4 | 0.11 | -1.94 | 0.03 | 0.215 | 0.977 | -0.50 |
| 0.6 | 0.18 | -1.98 | 0.06 | 0.265 | 0.938 | -0.77 |
| 0.8 | 0.24 | -1.26 | 0.14 | 0.484 | 0.930 | -0.61 |
| *m*B = 0.10 **mol·kg−1** GG | | | | | | |
| 0.2 | 0.09 | -2.83 | 0.01 | 0.096 | 0.977 | -0.61 |
| 0.4 | 0.08 | -1.42 | 0.03 | 0.302 | 0.991 | -0.28 |
| 0.6 | 0.15 | -1.58 | 0.05 | 0.320 | 0.965 | -0.53 |
| 0.8 | 0.26 | -1.70 | 0.13 | 0.394 | 0.891 | -0.87 |
| *m*B = 0.025 **mol·kg−1** GGG | | | | | | |
| 0.2 | 0.07 | -2.13 | 0.01 | 0.158 | 0.990 | -0.37 |
| 0.4 | 0.12 | -1.91 | 0.03 | 0.228 | 0.973 | -0.53 |
| 0.6 | 0.17 | -1.58 | 0.07 | 0.338 | 0.956 | -0.59 |
| 0.8 | 0.23 | -0.79 | 0.16 | 0.628 | 0.959 | -0.37 |
| *m*B = 0.05 **mol·kg−1** GGG | | | | | | |
| 0.2 | 0.12 | -3.16 | 0.01 | 0.087 | 0.956 | -0.88 |
| 0.4 | 0.16 | -2.59 | 0.03 | 0.161 | 0.936 | -0.92 |
| 0.6 | 0.18 | -1.71 | 0.07 | 0.316 | 0.946 | -0.67 |
| 0.8 | 0.29 | -1.73 | 0.16 | 0.419 | 0.865 | -0.94 |
| *m*B = 0.10 **mol·kg−1** GGG | | | | | | |
| 0.2 | 0.06 | -1.94 | 0.01 | 0.181 | 0.993 | -0.29 |
| 0.4 | 0.10 | -1.59 | 0.03 | 0.276 | 0.984 | -0.38 |
| 0.6 | 0.14 | -1.17 | 0.07 | 0.420 | 0.977 | -0.37 |
| 0.8 | 0.27 | -1.44 | 0.16 | 0.465 | 0.900 | -0.75 |

***m*B, molalities of glycine, glycylglycine and glycylglycylglycine.**

**Standard uncertainties:** **u (*T*) = 0.20 K, u (*m*) = 0.04 mol·kg−1**, **u (*α*PMZ) = 0.26**, **u (*X*1 */ X*1idea**l**) = 1.61**, **u (*β*int) =** **0.06, u (*f*1/*f*2) = 0.15, u (Δ*G*mex) = 0.16 kJ·mol-1 (0.95 level of confidence).**

**Table S4**

The densities, *ρ* of PMZ and CTAB, and their mixtures in glycine(aq), glycylglycine(aq) and glycylglycylglycine(aq) solutions as a function of temperature.

| ***ρ*·10−3 /(kg·m-3)** | | | | | | | | | | | | | |
| --- | --- | --- | --- | --- | --- | --- | --- | --- | --- | --- | --- | --- | --- |
| *m*A  (mol·kg−1) | *T*(K)=298.15 | | 308.15 | 318.15 | 298.15 | 308.15 | 318.15 | 298.15 | 308.15 | 318.15 | 298.15 | 308.15 | 318.15 |
| PMZ | | | | | | | | | | | | | |
|  | *m*B = 0.00 **mol·kg−1** | | | | *m*B = 0.025 **mol·kg−1** G | | | *m*B = 0.05 **mol·kg−1** G | | | *m*B = 0.10 **mol·kg−1** G | | |
| 0.00000 | 0.997047 | 0.994040 | | 0.990220 | 0.997864 | 0.994844 | 0.991012 | 0.998665 | 0.995633 | 0.991794 | 1.000241 | 0.997180 | 0.993325 |
| 0.00352 | 0.997264 | 0.994251 | | 0.990420 | 0.998068 | 0.995042 | 0.991226 | 0.998878 | 0.995840 | 0.991996 | 1.000417 | 0.997388 | 0.993558 |
| 0.01053 | 0.997678 | 0.994717 | | 0.990870 | 0.998549 | 0.995451 | 0.991644 | 0.999357 | 0.996293 | 0.992435 | 1.000912 | 0.997833 | 0.994020 |
| 0.01748 | 0.998210 | 0.995176 | | 0.991313 | 0.999018 | 0.995870 | 0.992036 | 0.999825 | 0.996701 | 0.992872 | 1.001319 | 0.998278 | 0.994475 |
| 0.02097 | 0.998450 | 0.995389 | | 0.991541 | 0.999274 | 0.996117 | 0.992252 | 1.000060 | 0.996904 | 0.993091 | 1.001541 | 0.998498 | 0.994702 |
| 0.02450 | 0.998670 | 0.995633 | | 0.991756 | 0.999487 | 0.996302 | 0.992441 | 1.000310 | 0.997138 | 0.993310 | 1.001747 | 0.998730 | 0.994943 |
| 0.02805 | 0.998910 | 0.995847 | | 0.991999 | 0.999743 | 0.996501 | 0.992631 | 1.000529 | 0.997341 | 0.993545 | 1.002020 | 0.998936 | 0.995128 |
| 0.03148 | 0.999140 | 0.996091 | | 0.992213 | 0.999941 | 0.996729 | 0.992751 | 1.000733 | 0.997560 | 0.993702 | 1.002171 | 0.999154 | 0.995257 |
| 0.03497 | 0.999380 | 0.996320 | | 0.992427 | 1.000083 | 0.996884 | 0.992847 | 1.000888 | 0.997665 | 0.993842 | 1.002310 | 0.999311 | 0.995370 |
| 0.04198 | 0.999760 | 0.996671 | | 0.992777 | 1.000383 | 0.997126 | 0.993048 | 1.001185 | 0.997966 | 0.994139 | 1.002600 | 0.999608 | 0.995612 |
| 0.04896 | 1.000130 | 0.997068 | | 0.993144 | 1.000666 | 0.997353 | 0.993237 | 1.001482 | 0.998232 | 0.994451 | 1.002924 | 0.999889 | 0.995825 |
| 0.05594 | 1.000480 | 0.997372 | | 0.993495 | 1.000965 | 0.997595 | 0.993427 | 1.001779 | 0.998498 | 0.994764 | 1.003214 | 1.000186 | 0.996067 |
| 0.06301 | 1.000900 | 0.997799 | | 0.993861 | 1.001263 | 0.997837 | 0.993616 | 1.002078 | 0.998779 | 0.995060 | 1.003521 | 1.000498 | 0.996308 |
| 0.07000 | 1.001309 | 0.998180 | | 0.994245 | 1.001547 | 0.998064 | 0.993819 | 1.002375 | 0.999045 | 0.995375 | 1.003794 | 1.000811 | 0.996536 |
|  |  |  | |  |  |  |  |  |  |  |  |  |  |
| CTAB | | | | | | | | | | | | | |
|  | *m*B = 0.00 **mol·kg−1** | | | | *m*B = 0.025 **mol·kg−1** G | | | *m*B = 0.05 **mol·kg−1** G | | | *m*B = 0.10 **mol·kg−1** G | | |
| 0.00000 | 0.997047 | 0.994040 | | 0.990220 | 0.997864 | 0.994844 | 0.991012 | 0.998665 | 0.995633 | 0.991794 | 1.000241 | 0.997180 | 0.993325 |
| 0.00010 | 0.997049 | 0.994042 | | 0.990229 | 0.997866 | 0.994847 | 0.991019 | 0.998667 | 0.995634 | 0.991795 | 1.000271 | 0.997213 | 0.993546 |
| 0.00030 | 0.997054 | 0.994045 | | 0.990251 | 0.997870 | 0.994851 | 0.991028 | 0.998670 | 0.995637 | 0.991798 | 1.000329 | 0.997282 | 0.993990 |
| 0.00051 | 0.997058 | 0.994048 | | 0.990272 | 0.997875 | 0.994856 | 0.991040 | 0.998674 | 0.995640 | 0.991800 | 1.000389 | 0.997351 | 0.994485 |
| 0.00060 | 0.997060 | 0.994049 | | 0.990283 | 0.997877 | 0.994859 | 0.991044 | 0.998676 | 0.995641 | 0.991801 | 1.000422 | 0.997391 | 0.994768 |
| 0.00074 | 0.997063 | 0.994051 | | 0.990296 | 0.997880 | 0.994862 | 0.991051 | 0.998678 | 0.995643 | 0.991803 | 1.000447 | 0.997423 | 0.994980 |
| 0.00080 | 0.997065 | 0.994052 | | 0.990302 | 0.997881 | 0.994863 | 0.991053 | 0.998679 | 0.995644 | 0.991803 | 1.000478 | 0.997455 | 0.995157 |
| 0.00090 | 0.997067 | 0.994053 | | 0.990313 | 0.997883 | 0.994865 | 0.991057 | 0.998681 | 0.995645 | 0.991805 | 1.000511 | 0.997492 | 0.995475 |
| 0.00101 | 0.997070 | 0.994055 | | 0.990324 | 0.997884 | 0.994868 | 0.991064 | 0.998682 | 0.995646 | 0.991806 | 1.000513 | 0.997528 | 0.995677 |
| 0.00120 | 0.997072 | 0.994057 | | 0.990343 | 0.997886 | 0.994870 | 0.991072 | 0.998684 | 0.995647 | 0.991808 | 1.000536 | 0.997540 | 0.995970 |
| 0.00141 | 0.997074 | 0.994059 | | 0.990354 | 0.997888 | 0.994873 | 0.991077 | 0.998685 | 0.995649 | 0.991809 | 1.000561 | 0.997573 | 0.996273 |
| 0.00160 | 0.997077 | 0.994061 | | 0.990364 | 0.997891 | 0.994875 | 0.991084 | 0.998687 | 0.995650 | 0.991810 | 1.000586 | 0.997605 | 0.996546 |
| 0.00181 | 0.997079 | 0.994063 | | 0.990374 | 0.997893 | 0.994877 | 0.991092 | 0.998689 | 0.995651 | 0.991811 | 1.000612 | 0.997633 | 0.996849 |
| 0.00200 | 0.997081 | 0.994065 | | 0.990384 | 0.997895 | 0.994880 | 0.991098 | 0.998690 | 0.995652 | 0.991813 | 1.000634 | 0.997666 | 0.997121 |
|  |  |  | |  |  |  |  |  |  |  |  |  |  |
| *α*PMZ = 0.2 | | | | | | | | | | | | | |
|  | *m*B = 0.00 **mol·kg−1** | | | | *m*B = 0.025 **mol·kg−1** G | | | *m*B = 0.05 **mol·kg−1** G | | | *m*B = 0.10 **mol·kg−1** G | | |
| 0.00000 | 0.997047 | 0.994040 | | 0.990220 | 0.997864 | 0.994844 | 0.991012 | 0.998665 | 0.995633 | 0.991794 | 1.000241 | 0.997180 | 0.993325 |
| 0.00012 | 0.997051 | 0.994044 | | 0.990223 | 0.997867 | 0.994847 | 0.991015 | 0.998669 | 0.995636 | 0.991797 | 1.000249 | 0.997186 | 0.993331 |
| 0.00037 | 0.997060 | 0.994052 | | 0.990229 | 0.997874 | 0.994853 | 0.991021 | 0.998677 | 0.995643 | 0.991803 | 1.000263 | 0.997200 | 0.993343 |
| 0.00062 | 0.997068 | 0.994060 | | 0.990235 | 0.997881 | 0.994859 | 0.991027 | 0.998684 | 0.995649 | 0.991809 | 1.000279 | 0.997214 | 0.993355 |
| 0.00074 | 0.997073 | 0.994063 | | 0.990238 | 0.997884 | 0.994862 | 0.991030 | 0.998688 | 0.995653 | 0.991813 | 1.000286 | 0.997221 | 0.993361 |
| 0.00087 | 0.997077 | 0.994068 | | 0.990242 | 0.997888 | 0.994865 | 0.991033 | 0.998692 | 0.995656 | 0.991816 | 1.000294 | 0.997227 | 0.993367 |
| 0.00100 | 0.997082 | 0.994073 | | 0.990244 | 0.997891 | 0.994868 | 0.991036 | 0.998696 | 0.995659 | 0.991819 | 1.000302 | 0.997235 | 0.993374 |
| 0.00112 | 0.997086 | 0.994076 | | 0.990248 | 0.997894 | 0.994871 | 0.991039 | 0.998700 | 0.995662 | 0.991822 | 1.000306 | 0.997241 | 0.993380 |
| 0.00124 | 0.997088 | 0.994079 | | 0.990251 | 0.997896 | 0.994874 | 0.991042 | 0.998702 | 0.995665 | 0.991825 | 1.000307 | 0.997244 | 0.993386 |
| 0.00149 | 0.997092 | 0.994082 | | 0.990254 | 0.997899 | 0.994877 | 0.991046 | 0.998706 | 0.995668 | 0.991828 | 1.000311 | 0.997248 | 0.993391 |
| 0.00175 | 0.997095 | 0.994085 | | 0.990257 | 0.997902 | 0.994881 | 0.991050 | 0.998710 | 0.995671 | 0.991830 | 1.000314 | 0.997252 | 0.993395 |
| 0.00200 | 0.997099 | 0.994088 | | 0.990260 | 0.997906 | 0.994884 | 0.991053 | 0.998714 | 0.995673 | 0.991833 | 1.000317 | 0.997255 | 0.993399 |
| 0.00225 | 0.997103 | 0.994089 | | 0.990262 | 0.997909 | 0.994888 | 0.991057 | 0.998718 | 0.995676 | 0.991835 | 1.000320 | 0.997259 | 0.993404 |
| 0.00248 | 0.997106 | 0.994092 | | 0.990265 | 0.997912 | 0.994891 | 0.991060 | 0.998722 | 0.995679 | 0.991837 | 1.000323 | 0.997262 | 0.993408 |
|  |  |  | |  |  |  |  |  |  |  |  |  |  |
| *α*PMZ = 0.4 | | | | | | | | | | | | | |
|  | *m*B = 0.00 **mol·kg−1** | | | | *m*B = 0.025 **mol·kg−1** G | | | *m*B = 0.05 **mol·kg−1** G | | | *m*B = 0.10 **mol·kg−1** G | | |
| 0.00000 | 0.997047 | 0.994040 | | 0.990220 | 0.997864 | 0.994844 | 0.991012 | 0.998665 | 0.995633 | 0.991794 | 1.000241 | 0.997180 | 0.993325 |
| 0.00016 | 0.997055 | 0.994046 | | 0.990224 | 0.997871 | 0.994850 | 0.991017 | 0.998673 | 0.995639 | 0.991799 | 1.000251 | 0.997190 | 0.993333 |
| 0.00049 | 0.997069 | 0.994058 | | 0.990234 | 0.997885 | 0.994862 | 0.991029 | 0.998688 | 0.995652 | 0.991812 | 1.000271 | 0.997208 | 0.993350 |
| 0.00082 | 0.997083 | 0.994070 | | 0.990243 | 0.997901 | 0.994874 | 0.991041 | 0.998703 | 0.995665 | 0.991825 | 1.000290 | 0.997227 | 0.993367 |
| 0.00098 | 0.997091 | 0.994076 | | 0.990247 | 0.997907 | 0.994880 | 0.991047 | 0.998710 | 0.995672 | 0.991831 | 1.000301 | 0.997236 | 0.993376 |
| 0.00115 | 0.997097 | 0.994082 | | 0.990253 | 0.997915 | 0.994886 | 0.991053 | 0.998718 | 0.995679 | 0.991838 | 1.000310 | 0.997245 | 0.993385 |
| 0.00132 | 0.997105 | 0.994088 | | 0.990257 | 0.997922 | 0.994892 | 0.991059 | 0.998726 | 0.995685 | 0.991844 | 1.000320 | 0.997255 | 0.993394 |
| 0.00147 | 0.997112 | 0.994094 | | 0.990262 | 0.997929 | 0.994898 | 0.991065 | 0.998732 | 0.995692 | 0.991851 | 1.000326 | 0.997263 | 0.993402 |
| 0.00164 | 0.997116 | 0.994100 | | 0.990266 | 0.997933 | 0.994903 | 0.991071 | 0.998736 | 0.995696 | 0.991857 | 1.000331 | 0.997268 | 0.993409 |
| 0.00197 | 0.997122 | 0.994104 | | 0.990272 | 0.997941 | 0.994909 | 0.991077 | 0.998743 | 0.995703 | 0.991863 | 1.000340 | 0.997277 | 0.993418 |
| 0.00230 | 0.997128 | 0.994109 | | 0.990276 | 0.997948 | 0.994915 | 0.991082 | 0.998751 | 0.995710 | 0.991869 | 1.000350 | 0.997286 | 0.993427 |
| 0.00263 | 0.997133 | 0.994113 | | 0.990280 | 0.997956 | 0.994921 | 0.991086 | 0.998757 | 0.995717 | 0.991875 | 1.000360 | 0.997294 | 0.993435 |
| 0.00296 | 0.997139 | 0.994117 | | 0.990283 | 0.997963 | 0.994927 | 0.991091 | 0.998765 | 0.995725 | 0.991881 | 1.000368 | 0.997302 | 0.993444 |
| 0.00328 | 0.997144 | 0.994121 | | 0.990287 | 0.997971 | 0.994933 | 0.991096 | 0.998772 | 0.995731 | 0.991886 | 1.000378 | 0.997311 | 0.993453 |
|  |  |  | |  |  |  |  |  |  |  |  |  |  |
| *α*PMZ = 0.6 | | | | | | | | | | | | | |
|  | *m*B = 0.00 **mol·kg−1** | | | | *m*B = 0.025 **mol·kg−1** G | | | *m*B = 0.05 **mol·kg−1** G | | | *m*B = 0.10 **mol·kg−1** G | | |
| 0.00000 | 0.997047 | 0.994040 | | 0.990220 | 0.997864 | 0.994844 | 0.991012 | 0.998665 | 0.995633 | 0.991794 | 1.000241 | 0.997180 | 0.993325 |
| 0.00024 | 0.997061 | 0.994051 | | 0.990229 | 0.997874 | 0.994855 | 0.991022 | 0.998676 | 0.995645 | 0.991807 | 1.000257 | 0.997196 | 0.993339 |
| 0.00072 | 0.997087 | 0.994075 | | 0.990248 | 0.997901 | 0.994882 | 0.991045 | 0.998706 | 0.995671 | 0.991829 | 1.000292 | 0.997229 | 0.993373 |
| 0.00120 | 0.997115 | 0.994101 | | 0.990268 | 0.997926 | 0.994909 | 0.991067 | 0.998737 | 0.995694 | 0.991853 | 1.000327 | 0.997261 | 0.993404 |
| 0.00144 | 0.997129 | 0.994112 | | 0.990276 | 0.997938 | 0.994923 | 0.991079 | 0.998752 | 0.995706 | 0.991864 | 1.000345 | 0.997278 | 0.993420 |
| 0.00168 | 0.997140 | 0.994124 | | 0.990287 | 0.997951 | 0.994938 | 0.991091 | 0.998766 | 0.995718 | 0.991876 | 1.000363 | 0.997293 | 0.993439 |
| 0.00193 | 0.997153 | 0.994138 | | 0.990296 | 0.997963 | 0.994950 | 0.991101 | 0.998778 | 0.995730 | 0.991887 | 1.000377 | 0.997309 | 0.993453 |
| 0.00216 | 0.997166 | 0.994148 | | 0.990305 | 0.997972 | 0.994963 | 0.991111 | 0.998784 | 0.995738 | 0.991899 | 1.000387 | 0.997321 | 0.993469 |
| 0.00240 | 0.997174 | 0.994157 | | 0.990314 | 0.997980 | 0.994969 | 0.991120 | 0.998792 | 0.995745 | 0.991907 | 1.000397 | 0.997329 | 0.993477 |
| 0.00288 | 0.997191 | 0.994173 | | 0.990326 | 0.997997 | 0.994984 | 0.991134 | 0.998806 | 0.995759 | 0.991921 | 1.000415 | 0.997348 | 0.993494 |
| 0.00337 | 0.997208 | 0.994190 | | 0.990336 | 0.998014 | 0.994998 | 0.991148 | 0.998822 | 0.995772 | 0.991934 | 1.000434 | 0.997366 | 0.993510 |
| 0.00385 | 0.997225 | 0.994206 | | 0.990346 | 0.998029 | 0.995012 | 0.991160 | 0.998836 | 0.995785 | 0.991949 | 1.000455 | 0.997384 | 0.993527 |
| 0.00433 | 0.997242 | 0.994222 | | 0.990357 | 0.998046 | 0.995026 | 0.991173 | 0.998851 | 0.995797 | 0.991962 | 1.000474 | 0.997401 | 0.993542 |
| 0.00480 | 0.997259 | 0.994237 | | 0.990369 | 0.998062 | 0.995040 | 0.991186 | 0.998865 | 0.995810 | 0.991975 | 1.000493 | 0.997418 | 0.993559 |
|  |  |  | |  |  |  |  |  |  |  |  |  |  |
| *α*PMZ = 0.8 | | | | | | | | | | | | | |
|  | *m*B = 0.00 **mol·kg−1** | | | | *m*B = 0.025 **mol·kg−1** G | | | *m*B = 0.05 **mol·kg−1** G | | | *m*B = 0.10 **mol·kg−1** G | | |
| 0.00000 | 0.997047 | 0.994040 | | 0.990220 | 0.997864 | 0.994844 | 0.991012 | 0.998665 | 0.995633 | 0.991794 | 1.000241 | 0.997180 | 0.993325 |
| 0.00045 | 0.997071 | 0.994062 | | 0.990240 | 0.997893 | 0.994872 | 0.991036 | 0.998697 | 0.995662 | 0.991821 | 1.000273 | 0.997209 | 0.993354 |
| 0.00136 | 0.997128 | 0.994114 | | 0.990290 | 0.997962 | 0.994932 | 0.991100 | 0.998759 | 0.995723 | 0.991875 | 1.000339 | 0.997275 | 0.993422 |
| 0.00225 | 0.997189 | 0.994164 | | 0.990340 | 0.998028 | 0.994995 | 0.991159 | 0.998819 | 0.995784 | 0.991933 | 1.000406 | 0.997345 | 0.993488 |
| 0.00270 | 0.997213 | 0.994192 | | 0.990361 | 0.998060 | 0.995025 | 0.991190 | 0.998849 | 0.995815 | 0.991962 | 1.000440 | 0.997374 | 0.993523 |
| 0.00315 | 0.997241 | 0.994214 | | 0.990391 | 0.998095 | 0.995056 | 0.991220 | 0.998878 | 0.995845 | 0.991986 | 1.000473 | 0.997408 | 0.993555 |
| 0.00361 | 0.997274 | 0.994238 | | 0.990417 | 0.998122 | 0.995086 | 0.991251 | 0.998900 | 0.995880 | 0.992014 | 1.000493 | 0.997437 | 0.993591 |
| 0.00405 | 0.997294 | 0.994267 | | 0.990438 | 0.998139 | 0.995108 | 0.991281 | 0.998915 | 0.995894 | 0.992042 | 1.000512 | 0.997454 | 0.993613 |
| 0.00450 | 0.997311 | 0.994287 | | 0.990460 | 0.998156 | 0.995123 | 0.991300 | 0.998936 | 0.995908 | 0.992058 | 1.000531 | 0.997471 | 0.993625 |
| 0.00540 | 0.997351 | 0.994328 | | 0.990488 | 0.998190 | 0.995158 | 0.991326 | 0.998969 | 0.995942 | 0.992088 | 1.000570 | 0.997512 | 0.993657 |
| 0.00631 | 0.997390 | 0.994368 | | 0.990516 | 0.998224 | 0.995189 | 0.991354 | 0.999003 | 0.995970 | 0.992118 | 1.000609 | 0.997545 | 0.993688 |
| 0.00721 | 0.997425 | 0.994407 | | 0.990548 | 0.998255 | 0.995218 | 0.991383 | 0.999041 | 0.996003 | 0.992146 | 1.000648 | 0.997581 | 0.993720 |
| 0.00812 | 0.997464 | 0.994447 | | 0.990577 | 0.998292 | 0.995253 | 0.991411 | 0.999075 | 0.996031 | 0.992178 | 1.000689 | 0.997620 | 0.993749 |
| 0.00901 | 0.997500 | 0.994486 | | 0.990604 | 0.998323 | 0.995285 | 0.991438 | 0.999111 | 0.996061 | 0.992207 | 1.000725 | 0.997655 | 0.993782 |
| PMZ | | | | | | | | | | | | | |
|  | *m*B = 0.00 **mol·kg−1** | | | | *m*B = 0.025 **mol·kg−1** GG | | | *m*B = 0.05 **mol·kg−1** GG | | | *m*B = 0.10 **mol·kg−1** GG | | |
| 0.00000 | 0.997047 | 0.994040 | | 0.990220 | 0.998464 | 0.995437 | 0.991601 | 0.999865 | 0.996819 | 0.992969 | 1.002672 | 0.999589 | 0.995716 |
| 0.00352 | 0.997264 | 0.994251 | | 0.990420 | 0.998672 | 0.995641 | 0.991797 | 1.000072 | 0.997021 | 0.993218 | 1.002928 | 0.999787 | 0.995919 |
| 0.01053 | 0.997678 | 0.994717 | | 0.990870 | 0.999266 | 0.996149 | 0.992287 | 1.000607 | 0.997508 | 0.993690 | 1.003416 | 1.000273 | 0.996380 |
| 0.01748 | 0.998210 | 0.995176 | | 0.991313 | 0.999736 | 0.996620 | 0.992731 | 1.001064 | 0.997996 | 0.994148 | 1.003889 | 1.000745 | 0.996802 |
| 0.02097 | 0.998450 | 0.995389 | | 0.991541 | 0.999996 | 0.996870 | 0.992953 | 1.001341 | 0.998225 | 0.994384 | 1.004148 | 1.000981 | 0.997026 |
| 0.02450 | 0.998670 | 0.995633 | | 0.991756 | 1.000256 | 0.997106 | 0.993175 | 1.001563 | 0.998484 | 0.994647 | 1.004408 | 1.001189 | 0.997250 |
| 0.02805 | 0.998910 | 0.995847 | | 0.991999 | 1.000515 | 0.997356 | 0.993411 | 1.001828 | 0.998728 | 0.994813 | 1.004621 | 1.001439 | 0.997434 |
| 0.03148 | 0.999140 | 0.996091 | | 0.992213 | 1.000728 | 0.997605 | 0.993578 | 1.001994 | 0.998912 | 0.994966 | 1.004789 | 1.001619 | 0.997606 |
| 0.03497 | 0.999380 | 0.996320 | | 0.992427 | 1.000881 | 0.997771 | 0.993757 | 1.002147 | 0.999064 | 0.995119 | 1.004972 | 1.001785 | 0.997790 |
| 0.04198 | 0.999760 | 0.996671 | | 0.992777 | 1.001232 | 0.998132 | 0.994132 | 1.002479 | 0.999369 | 0.995466 | 1.005324 | 1.002146 | 0.998107 |
| 0.04896 | 1.000130 | 0.997068 | | 0.993144 | 1.001583 | 0.998493 | 0.994493 | 1.002827 | 0.999675 | 0.995772 | 1.005675 | 1.002494 | 0.998476 |
| 0.05594 | 1.000480 | 0.997372 | | 0.993495 | 1.001919 | 0.998840 | 0.994854 | 1.003132 | 0.999980 | 0.996098 | 1.006056 | 1.002854 | 0.998832 |
| 0.06301 | 1.000900 | 0.997799 | | 0.993861 | 1.002239 | 0.999161 | 0.995213 | 1.003478 | 1.000284 | 0.996409 | 1.006423 | 1.003214 | 0.999161 |
| 0.07000 | 1.001309 | 0.998180 | | 0.994245 | 1.002575 | 0.999529 | 0.995582 | 1.003798 | 1.000591 | 0.996743 | 1.006748 | 1.003544 | 0.999505 |
|  |  |  | |  |  |  |  |  |  |  |  |  |  |
| CTAB | | | | | | | | | | | | | |
|  | *m*B = 0.00 **mol·kg−1** | | | | *m*B = 0.025 **mol·kg−1** GG | | | *m*B = 0.05 **mol·kg−1** GG | | | *m*B = 0.10 **mol·kg−1** GG | | |
| 0.00000 | 0.997047 | 0.994040 | | 0.990220 | 0.998464 | 0.995437 | 0.991601 | 0.999865 | 0.996819 | 0.992969 | 1.002672 | 0.999589 | 0.995716 |
| 0.00010 | 0.997049 | 0.994042 | | 0.990229 | 0.998468 | 0.995440 | 0.991604 | 0.999868 | 0.996823 | 0.992972 | 1.002677 | 0.999594 | 0.995720 |
| 0.00030 | 0.997054 | 0.994045 | | 0.990251 | 0.998476 | 0.995447 | 0.991609 | 0.999876 | 0.996831 | 0.992981 | 1.002689 | 0.999604 | 0.995730 |
| 0.00051 | 0.997058 | 0.994048 | | 0.990272 | 0.998484 | 0.995453 | 0.991615 | 0.999884 | 0.996839 | 0.992990 | 1.002702 | 0.999614 | 0.995742 |
| 0.00060 | 0.997060 | 0.994049 | | 0.990283 | 0.998488 | 0.995457 | 0.991617 | 0.999886 | 0.996843 | 0.992993 | 1.002707 | 0.999619 | 0.995746 |
| 0.00074 | 0.997063 | 0.994051 | | 0.990296 | 0.998494 | 0.995461 | 0.991621 | 0.999892 | 0.996848 | 0.992999 | 1.002715 | 0.999626 | 0.995753 |
| 0.00080 | 0.997065 | 0.994052 | | 0.990302 | 0.998496 | 0.995463 | 0.991623 | 0.999893 | 0.996850 | 0.993001 | 1.002718 | 0.999629 | 0.995756 |
| 0.00090 | 0.997067 | 0.994053 | | 0.990313 | 0.998500 | 0.995466 | 0.991625 | 0.999896 | 0.996854 | 0.993005 | 1.002722 | 0.999635 | 0.995761 |
| 0.00101 | 0.997070 | 0.994055 | | 0.990324 | 0.998502 | 0.995470 | 0.991628 | 0.999898 | 0.996857 | 0.993009 | 1.002724 | 0.999637 | 0.995766 |
| 0.00120 | 0.997072 | 0.994057 | | 0.990343 | 0.998505 | 0.995472 | 0.991632 | 0.999901 | 0.996860 | 0.993014 | 1.002729 | 0.999641 | 0.995770 |
| 0.00141 | 0.997074 | 0.994059 | | 0.990354 | 0.998508 | 0.995475 | 0.991635 | 0.999905 | 0.996864 | 0.993018 | 1.002734 | 0.999645 | 0.995775 |
| 0.00160 | 0.997077 | 0.994061 | | 0.990364 | 0.998512 | 0.995478 | 0.991638 | 0.999908 | 0.996867 | 0.993022 | 1.002737 | 0.999649 | 0.995780 |
| 0.00181 | 0.997079 | 0.994063 | | 0.990374 | 0.998515 | 0.995480 | 0.991641 | 0.999912 | 0.996871 | 0.993025 | 1.002742 | 0.999654 | 0.995785 |
| 0.00200 | 0.997081 | 0.994065 | | 0.990384 | 0.998518 | 0.995483 | 0.991643 | 0.999915 | 0.996874 | 0.993029 | 1.002746 | 0.999658 | 0.995789 |
|  |  |  | |  |  |  |  |  |  |  |  |  |  |
| *α*PMZ = 0.2 | | | | | | | | | | | | | |
|  | *m*B = 0.00 **mol·kg−1** | | | | *m*B = 0.025 **mol·kg−1** GG | | | *m*B = 0.05 **mol·kg−1** GG | | | *m*B = 0.10 **mol·kg−1** GG | | |
| 0.00000 | 0.997047 | 0.994040 | | 0.990220 | 0.998464 | 0.995437 | 0.991601 | 0.999865 | 0.996819 | 0.992969 | 1.002672 | 0.999589 | 0.995716 |
| 0.00012 | 0.997051 | 0.994044 | | 0.990223 | 0.998467 | 0.995440 | 0.991604 | 0.999871 | 0.996824 | 0.992974 | 1.002690 | 0.999603 | 0.995733 |
| 0.00037 | 0.997060 | 0.994052 | | 0.990229 | 0.998474 | 0.995447 | 0.991610 | 0.999885 | 0.996838 | 0.992987 | 1.002728 | 0.999627 | 0.995766 |
| 0.00062 | 0.997068 | 0.994060 | | 0.990235 | 0.998481 | 0.995453 | 0.991616 | 0.999899 | 0.996850 | 0.992999 | 1.002763 | 0.999652 | 0.995796 |
| 0.00074 | 0.997073 | 0.994063 | | 0.990238 | 0.998485 | 0.995457 | 0.991619 | 0.999905 | 0.996856 | 0.993005 | 1.002778 | 0.999666 | 0.995813 |
| 0.00087 | 0.997077 | 0.994068 | | 0.990242 | 0.998488 | 0.995460 | 0.991623 | 0.999913 | 0.996863 | 0.993011 | 1.002794 | 0.999678 | 0.995829 |
| 0.00100 | 0.997082 | 0.994073 | | 0.990244 | 0.998492 | 0.995464 | 0.991626 | 0.999919 | 0.996869 | 0.993018 | 1.002814 | 0.999692 | 0.995844 |
| 0.00112 | 0.997086 | 0.994076 | | 0.990248 | 0.998495 | 0.995467 | 0.991629 | 0.999925 | 0.996875 | 0.993024 | 1.002823 | 0.999702 | 0.995858 |
| 0.00124 | 0.997088 | 0.994079 | | 0.990251 | 0.998497 | 0.995469 | 0.991632 | 0.999927 | 0.996879 | 0.993028 | 1.002829 | 0.999710 | 0.995868 |
| 0.00149 | 0.997092 | 0.994082 | | 0.990254 | 0.998502 | 0.995473 | 0.991635 | 0.999934 | 0.996887 | 0.993034 | 1.002848 | 0.999725 | 0.995886 |
| 0.00175 | 0.997095 | 0.994085 | | 0.990257 | 0.998506 | 0.995477 | 0.991638 | 0.999942 | 0.996896 | 0.993041 | 1.002866 | 0.999744 | 0.995904 |
| 0.00200 | 0.997099 | 0.994088 | | 0.990260 | 0.998511 | 0.995481 | 0.991641 | 0.999948 | 0.996903 | 0.993047 | 1.002883 | 0.999762 | 0.995924 |
| 0.00225 | 0.997103 | 0.994089 | | 0.990262 | 0.998515 | 0.995484 | 0.991643 | 0.999955 | 0.996911 | 0.993053 | 1.002899 | 0.999777 | 0.995941 |
| 0.00248 | 0.997106 | 0.994092 | | 0.990265 | 0.998519 | 0.995488 | 0.991646 | 0.999961 | 0.996919 | 0.993060 | 1.002916 | 0.999792 | 0.995957 |
|  |  |  | |  |  |  |  |  |  |  |  |  |  |
| *α*PMZ = 0.4 | | | | | | | | | | | | | |
|  | *m*B = 0.00 **mol·kg−1** | | | | *m*B = 0.025 **mol·kg−1** GG | | | *m*B = 0.05 **mol·kg−1** GG | | | *m*B = 0.10 **mol·kg−1** GG | | |
| 0.00000 | 0.997047 | 0.994040 | | 0.990220 | 0.998464 | 0.995437 | 0.991601 | 0.999865 | 0.996819 | 0.992969 | 1.002672 | 0.999589 | 0.995716 |
| 0.00016 | 0.997055 | 0.994046 | | 0.990224 | 0.998470 | 0.995442 | 0.991606 | 0.999871 | 0.996823 | 0.992973 | 1.002679 | 0.999595 | 0.995722 |
| 0.00049 | 0.997069 | 0.994058 | | 0.990234 | 0.998484 | 0.995454 | 0.991616 | 0.999885 | 0.996834 | 0.992983 | 1.002694 | 0.999610 | 0.995735 |
| 0.00082 | 0.997083 | 0.994070 | | 0.990243 | 0.998500 | 0.995465 | 0.991626 | 0.999897 | 0.996844 | 0.992993 | 1.002710 | 0.999623 | 0.995748 |
| 0.00098 | 0.997091 | 0.994076 | | 0.990247 | 0.998507 | 0.995472 | 0.991631 | 0.999904 | 0.996848 | 0.992998 | 1.002716 | 0.999630 | 0.995754 |
| 0.00115 | 0.997097 | 0.994082 | | 0.990253 | 0.998514 | 0.995478 | 0.991635 | 0.999911 | 0.996854 | 0.993003 | 1.002725 | 0.999636 | 0.995761 |
| 0.00132 | 0.997105 | 0.994088 | | 0.990257 | 0.998521 | 0.995483 | 0.991641 | 0.999917 | 0.996859 | 0.993008 | 1.002731 | 0.999644 | 0.995768 |
| 0.00147 | 0.997112 | 0.994094 | | 0.990262 | 0.998528 | 0.995489 | 0.991645 | 0.999920 | 0.996862 | 0.993012 | 1.002735 | 0.999648 | 0.995773 |
| 0.00164 | 0.997116 | 0.994100 | | 0.990266 | 0.998532 | 0.995493 | 0.991650 | 0.999923 | 0.996865 | 0.993015 | 1.002740 | 0.999651 | 0.995776 |
| 0.00197 | 0.997122 | 0.994104 | | 0.990272 | 0.998542 | 0.995499 | 0.991656 | 0.999930 | 0.996870 | 0.993020 | 1.002749 | 0.999660 | 0.995785 |
| 0.00230 | 0.997128 | 0.994109 | | 0.990276 | 0.998551 | 0.995505 | 0.991661 | 0.999937 | 0.996876 | 0.993026 | 1.002759 | 0.999668 | 0.995793 |
| 0.00263 | 0.997133 | 0.994113 | | 0.990280 | 0.998561 | 0.995512 | 0.991667 | 0.999943 | 0.996882 | 0.993031 | 1.002768 | 0.999676 | 0.995801 |
| 0.00296 | 0.997139 | 0.994117 | | 0.990283 | 0.998571 | 0.995519 | 0.991673 | 0.999950 | 0.996887 | 0.993037 | 1.002776 | 0.999685 | 0.995810 |
| 0.00328 | 0.997144 | 0.994121 | | 0.990287 | 0.998581 | 0.995525 | 0.991678 | 0.999956 | 0.996893 | 0.993042 | 1.002785 | 0.999692 | 0.995818 |
|  |  |  | |  |  |  |  |  |  |  |  |  |  |
| *α*PMZ = 0.6 | | | | | | | | | | | | | |
|  | *m*B = 0.00 **mol·kg−1** | | | | *m*B = 0.025 **mol·kg−1** GG | | | *m*B = 0.05 **mol·kg−1** GG | | | *m*B = 0.10 **mol·kg−1** GG | | |
| 0.00000 | 0.997047 | 0.994040 | | 0.990220 | 0.998464 | 0.995437 | 0.991601 | 0.999865 | 0.996819 | 0.992969 | 1.002672 | 0.999589 | 0.995716 |
| 0.00024 | 0.997061 | 0.994051 | | 0.990229 | 0.998475 | 0.995447 | 0.991611 | 0.999878 | 0.996832 | 0.992978 | 1.002684 | 0.999600 | 0.995726 |
| 0.00072 | 0.997087 | 0.994075 | | 0.990248 | 0.998501 | 0.995469 | 0.991632 | 0.999903 | 0.996857 | 0.992998 | 1.002708 | 0.999625 | 0.995750 |
| 0.00120 | 0.997115 | 0.994101 | | 0.990268 | 0.998522 | 0.995491 | 0.991653 | 0.999929 | 0.996881 | 0.993019 | 1.002734 | 0.999647 | 0.995774 |
| 0.00144 | 0.997129 | 0.994112 | | 0.990276 | 0.998533 | 0.995502 | 0.991662 | 0.999940 | 0.996896 | 0.993030 | 1.002746 | 0.999659 | 0.995785 |
| 0.00168 | 0.997140 | 0.994124 | | 0.990287 | 0.998547 | 0.995513 | 0.991673 | 0.999951 | 0.996907 | 0.993040 | 1.002759 | 0.999670 | 0.995798 |
| 0.00193 | 0.997153 | 0.994138 | | 0.990296 | 0.998559 | 0.995525 | 0.991683 | 0.999964 | 0.996921 | 0.993050 | 1.002768 | 0.999683 | 0.995809 |
| 0.00216 | 0.997166 | 0.994148 | | 0.990305 | 0.998567 | 0.995536 | 0.991695 | 0.999971 | 0.996929 | 0.993059 | 1.002777 | 0.999689 | 0.995815 |
| 0.00240 | 0.997174 | 0.994157 | | 0.990314 | 0.998577 | 0.995542 | 0.991701 | 0.999979 | 0.996938 | 0.993065 | 1.002786 | 0.999698 | 0.995821 |
| 0.00288 | 0.997191 | 0.994173 | | 0.990326 | 0.998593 | 0.995559 | 0.991718 | 0.999995 | 0.996955 | 0.993075 | 1.002803 | 0.999712 | 0.995832 |
| 0.00337 | 0.997208 | 0.994190 | | 0.990336 | 0.998611 | 0.995576 | 0.991735 | 1.000012 | 0.996971 | 0.993087 | 1.002821 | 0.999728 | 0.995842 |
| 0.00385 | 0.997225 | 0.994206 | | 0.990346 | 0.998627 | 0.995593 | 0.991751 | 1.000026 | 0.996989 | 0.993099 | 1.002837 | 0.999743 | 0.995853 |
| 0.00433 | 0.997242 | 0.994222 | | 0.990357 | 0.998643 | 0.995609 | 0.991768 | 1.000043 | 0.997005 | 0.993110 | 1.002855 | 0.999759 | 0.995865 |
| 0.00480 | 0.997259 | 0.994237 | | 0.990369 | 0.998661 | 0.995626 | 0.991782 | 1.000058 | 0.997022 | 0.993121 | 1.002873 | 0.999775 | 0.995875 |
|  |  |  | |  |  |  |  |  |  |  |  |  |  |
| *α*PMZ = 0.8 | | | | | | | | | | | | | |
|  | *m*B = 0.00 **mol·kg−1** | | | | *m*B = 0.025 **mol·kg−1** GG | | | *m*B = 0.05 **mol·kg−1** GG | | | *m*B = 0.10 **mol·kg−1** GG | | |
| 0.00000 | 0.997047 | 0.994040 | | 0.990220 | 0.998464 | 0.995437 | 0.991601 | 0.999865 | 0.996819 | 0.992969 | 1.002672 | 0.999589 | 0.995716 |
| 0.00045 | 0.997071 | 0.994062 | | 0.990240 | 0.998490 | 0.995459 | 0.991623 | 0.999891 | 0.996848 | 0.992993 | 1.002699 | 0.999618 | 0.995745 |
| 0.00136 | 0.997128 | 0.994114 | | 0.990290 | 0.998543 | 0.995511 | 0.991675 | 0.999953 | 0.996903 | 0.993043 | 1.002764 | 0.999674 | 0.995809 |
| 0.00225 | 0.997189 | 0.994164 | | 0.990340 | 0.998596 | 0.995558 | 0.991724 | 1.000014 | 0.996958 | 0.993094 | 1.002826 | 0.999737 | 0.995873 |
| 0.00270 | 0.997213 | 0.994192 | | 0.990361 | 0.998622 | 0.995583 | 0.991745 | 1.000044 | 0.996984 | 0.993114 | 1.002855 | 0.999766 | 0.995904 |
| 0.00315 | 0.997241 | 0.994214 | | 0.990391 | 0.998647 | 0.995613 | 0.991772 | 1.000069 | 0.997011 | 0.993143 | 1.002887 | 0.999795 | 0.995937 |
| 0.00361 | 0.997274 | 0.994238 | | 0.990417 | 0.998671 | 0.995633 | 0.991797 | 1.000091 | 0.997036 | 0.993170 | 1.002908 | 0.999814 | 0.995958 |
| 0.00405 | 0.997294 | 0.994267 | | 0.990438 | 0.998691 | 0.995655 | 0.991823 | 1.000109 | 0.997056 | 0.993190 | 1.002930 | 0.999836 | 0.995976 |
| 0.00450 | 0.997311 | 0.994287 | | 0.990460 | 0.998708 | 0.995670 | 0.991840 | 1.000132 | 0.997077 | 0.993208 | 1.002949 | 0.999855 | 0.995991 |
| 0.00540 | 0.997351 | 0.994328 | | 0.990488 | 0.998744 | 0.995703 | 0.991878 | 1.000171 | 0.997114 | 0.993244 | 1.002991 | 0.999895 | 0.996026 |
| 0.00631 | 0.997390 | 0.994368 | | 0.990516 | 0.998786 | 0.995740 | 0.991913 | 1.000214 | 0.997156 | 0.993283 | 1.003032 | 0.999934 | 0.996059 |
| 0.00721 | 0.997425 | 0.994407 | | 0.990548 | 0.998821 | 0.995775 | 0.991950 | 1.000254 | 0.997194 | 0.993321 | 1.003072 | 0.999974 | 0.996094 |
| 0.00812 | 0.997464 | 0.994447 | | 0.990577 | 0.998859 | 0.995810 | 0.991985 | 1.000294 | 0.997234 | 0.993355 | 1.003114 | 1.000014 | 0.996129 |
| 0.00901 | 0.997500 | 0.994486 | | 0.990604 | 0.998894 | 0.995844 | 0.992021 | 1.000336 | 0.997272 | 0.993393 | 1.003156 | 1.000054 | 0.996165 |
|  |  |  | |  |  |  |  |  |  |  |  |  |  |
| PMZ | | | | | | | | | | | | | |
|  | *m*B = 0.00 **mol·kg−1** | | | | *m*B = 0.025 **mol·kg−1** GGG | | | *m*B = 0.05 **mol·kg−1** GGG | | | *m*B = 0.10 **mol·kg−1** GGG | | |
| 0.00000 | 0.997047 | 0.994040 | | 0.990220 | 0.999054 | 0.996018 | 0.992176 | 1.000874 | 0.997811 | 0.993950 | 1.004872 | 1.001754 | 0.997853 |
| 0.00352 | 0.997264 | 0.994251 | | 0.990420 | 0.999272 | 0.996263 | 0.992403 | 1.001091 | 0.998012 | 0.994164 | 1.005091 | 1.001966 | 0.998122 |
| 0.01053 | 0.997678 | 0.994717 | | 0.990870 | 0.999809 | 0.996775 | 0.992888 | 1.001621 | 0.998539 | 0.994660 | 1.005669 | 1.002466 | 0.998662 |
| 0.01748 | 0.998210 | 0.995176 | | 0.991313 | 1.000310 | 0.997304 | 0.993356 | 1.002154 | 0.999044 | 0.995159 | 1.006247 | 1.002920 | 0.999173 |
| 0.02097 | 0.998450 | 0.995389 | | 0.991541 | 1.000560 | 0.997560 | 0.993575 | 1.002389 | 0.999279 | 0.995387 | 1.006529 | 1.003170 | 0.999443 |
| 0.02450 | 0.998670 | 0.995633 | | 0.991756 | 1.000795 | 0.997798 | 0.993795 | 1.002655 | 0.999545 | 0.995600 | 1.006763 | 1.003388 | 0.999614 |
| 0.02805 | 0.998910 | 0.995847 | | 0.991999 | 1.001045 | 0.998054 | 0.993998 | 1.002872 | 0.999764 | 0.995771 | 1.006967 | 1.003576 | 0.999813 |
| 0.03148 | 0.999140 | 0.996091 | | 0.992213 | 1.001233 | 0.998225 | 0.994185 | 1.003060 | 0.999935 | 0.995970 | 1.007154 | 1.003764 | 0.999999 |
| 0.03497 | 0.999380 | 0.996320 | | 0.992427 | 1.001404 | 0.998395 | 0.994357 | 1.003248 | 1.000123 | 0.996182 | 1.007342 | 1.003950 | 1.000182 |
| 0.04198 | 0.999760 | 0.996671 | | 0.992777 | 1.001811 | 0.998771 | 0.994716 | 1.003654 | 1.000498 | 0.996538 | 1.007749 | 1.004311 | 1.000538 |
| 0.04896 | 1.000130 | 0.997068 | | 0.993144 | 1.002257 | 0.999127 | 0.995093 | 1.004030 | 1.000874 | 0.996907 | 1.008122 | 1.004670 | 1.000920 |
| 0.05594 | 1.000480 | 0.997372 | | 0.993495 | 1.002629 | 0.999488 | 0.995452 | 1.004436 | 1.001264 | 0.997306 | 1.008529 | 1.005029 | 1.001278 |
| 0.06301 | 1.000900 | 0.997799 | | 0.993861 | 1.002968 | 0.999828 | 0.995826 | 1.004795 | 1.001625 | 0.997661 | 1.008906 | 1.005390 | 1.001632 |
| 0.07000 | 1.001309 | 0.998180 | | 0.994245 | 1.003342 | 1.000185 | 0.996232 | 1.005181 | 1.001998 | 0.998031 | 1.009321 | 1.005765 | 1.001988 |
|  |  |  | |  |  |  |  |  |  |  |  |  |  |
| CTAB | | | | | | | | | | | | | |
|  | *m*B = 0.00 **mol·kg−1** | | | | *m*B = 0.025 **mol·kg−1** GGG | | | *m*B = 0.05 **mol·kg−1** GGG | | | *m*B = 0.10 **mol·kg−1** GGG | | |
| 0.00000 | 0.997047 | 0.994040 | | 0.990220 | 0.999054 | 0.996018 | 0.992176 | 1.000874 | 0.997811 | 0.993950 | 1.004872 | 1.001754 | 0.997853 |
| 0.00010 | 0.997049 | 0.994042 | | 0.990229 | 0.999057 | 0.996020 | 0.992180 | 1.000883 | 0.997821 | 0.993960 | 1.004873 | 1.001755 | 0.997854 |
| 0.00030 | 0.997054 | 0.994045 | | 0.990251 | 0.999063 | 0.996025 | 0.992186 | 1.000907 | 0.997844 | 0.993980 | 1.004875 | 1.001757 | 0.997855 |
| 0.00051 | 0.997058 | 0.994048 | | 0.990272 | 0.999069 | 0.996030 | 0.992193 | 1.000931 | 0.997868 | 0.994001 | 1.004877 | 1.001760 | 0.997857 |
| 0.00060 | 0.997060 | 0.994049 | | 0.990283 | 0.999071 | 0.996033 | 0.992196 | 1.000941 | 0.997877 | 0.994010 | 1.004878 | 1.001761 | 0.997857 |
| 0.00074 | 0.997063 | 0.994051 | | 0.990296 | 0.999075 | 0.996036 | 0.992201 | 1.000957 | 0.997892 | 0.994022 | 1.004880 | 1.001762 | 0.997858 |
| 0.00080 | 0.997065 | 0.994052 | | 0.990302 | 0.999077 | 0.996037 | 0.992203 | 1.000964 | 0.997899 | 0.994028 | 1.004881 | 1.001763 | 0.997859 |
| 0.00090 | 0.997067 | 0.994053 | | 0.990313 | 0.999079 | 0.996040 | 0.992206 | 1.000971 | 0.997910 | 0.994038 | 1.004881 | 1.001764 | 0.997860 |
| 0.00101 | 0.997070 | 0.994055 | | 0.990324 | 0.999081 | 0.996042 | 0.992210 | 1.000977 | 0.997917 | 0.994049 | 1.004882 | 1.001764 | 0.997860 |
| 0.00120 | 0.997072 | 0.994057 | | 0.990343 | 0.999083 | 0.996045 | 0.992214 | 1.000988 | 0.997927 | 0.994060 | 1.004883 | 1.001765 | 0.997861 |
| 0.00141 | 0.997074 | 0.994059 | | 0.990354 | 0.999086 | 0.996047 | 0.992218 | 1.000999 | 0.997936 | 0.994070 | 1.004884 | 1.001766 | 0.997862 |
| 0.00160 | 0.997077 | 0.994061 | | 0.990364 | 0.999088 | 0.996050 | 0.992222 | 1.001010 | 0.997944 | 0.994078 | 1.004885 | 1.001768 | 0.997863 |
| 0.00181 | 0.997079 | 0.994063 | | 0.990374 | 0.999090 | 0.996052 | 0.992226 | 1.001021 | 0.997954 | 0.994088 | 1.004886 | 1.001769 | 0.997863 |
| 0.00200 | 0.997081 | 0.994065 | | 0.990384 | 0.999093 | 0.996055 | 0.992230 | 1.001032 | 0.997963 | 0.994096 | 1.004887 | 1.001770 | 0.997864 |
|  |  |  | |  |  |  |  |  |  |  |  |  |  |
| *α*PMZ = 0.2 | | | | | | | | | | | | | |
|  | *m*B = 0.00 **mol·kg−1** | | | | *m*B = 0.025 **mol·kg−1** GGG | | | *m*B = 0.05 **mol·kg−1** GGG | | | *m*B = 0.10 **mol·kg−1** GGG | | |
| 0.00000 | 0.997047 | 0.994040 | | 0.990220 | 0.999054 | 0.996018 | 0.992176 | 1.000874 | 0.997811 | 0.993950 | 1.004872 | 1.001754 | 0.997853 |
| 0.00012 | 0.997051 | 0.994044 | | 0.990223 | 0.999058 | 0.996022 | 0.992180 | 1.000886 | 0.997822 | 0.993961 | 1.004875 | 1.001758 | 0.997857 |
| 0.00037 | 0.997060 | 0.994052 | | 0.990229 | 0.999067 | 0.996030 | 0.992188 | 1.000915 | 0.997846 | 0.993986 | 1.004883 | 1.001766 | 0.997864 |
| 0.00062 | 0.997068 | 0.994060 | | 0.990235 | 0.999076 | 0.996039 | 0.992195 | 1.000942 | 0.997869 | 0.994011 | 1.004891 | 1.001774 | 0.997871 |
| 0.00074 | 0.997073 | 0.994063 | | 0.990238 | 0.999081 | 0.996043 | 0.992199 | 1.000957 | 0.997880 | 0.994023 | 1.004895 | 1.001778 | 0.997875 |
| 0.00087 | 0.997077 | 0.994068 | | 0.990242 | 0.999085 | 0.996047 | 0.992203 | 1.000970 | 0.997892 | 0.994036 | 1.004899 | 1.001782 | 0.997878 |
| 0.00100 | 0.997082 | 0.994073 | | 0.990244 | 0.999090 | 0.996051 | 0.992207 | 1.000985 | 0.997905 | 0.994049 | 1.004903 | 1.001786 | 0.997882 |
| 0.00112 | 0.997086 | 0.994076 | | 0.990248 | 0.999093 | 0.996055 | 0.992211 | 1.000994 | 0.997915 | 0.994060 | 1.004905 | 1.001788 | 0.997885 |
| 0.00124 | 0.997088 | 0.994079 | | 0.990251 | 0.999095 | 0.996058 | 0.992214 | 1.001001 | 0.997922 | 0.994069 | 1.004908 | 1.001790 | 0.997887 |
| 0.00149 | 0.997092 | 0.994082 | | 0.990254 | 0.999099 | 0.996062 | 0.992218 | 1.001015 | 0.997939 | 0.994081 | 1.004912 | 1.001794 | 0.997890 |
| 0.00175 | 0.997095 | 0.994085 | | 0.990257 | 0.999104 | 0.996065 | 0.992222 | 1.001028 | 0.997955 | 0.994095 | 1.004916 | 1.001799 | 0.997894 |
| 0.00200 | 0.997099 | 0.994088 | | 0.990260 | 0.999108 | 0.996069 | 0.992225 | 1.001042 | 0.997970 | 0.994107 | 1.004921 | 1.001802 | 0.997898 |
| 0.00225 | 0.997103 | 0.994089 | | 0.990262 | 0.999112 | 0.996073 | 0.992229 | 1.001056 | 0.997988 | 0.994121 | 1.004925 | 1.001807 | 0.997902 |
| 0.00248 | 0.997106 | 0.994092 | | 0.990265 | 0.999116 | 0.996076 | 0.992232 | 1.001070 | 0.998001 | 0.994133 | 1.004929 | 1.001810 | 0.997905 |
|  |  |  | |  |  |  |  |  |  |  |  |  |  |
| *α*PMZ = 0.4 | | | | | | | | | | | | | |
|  | *m*B = 0.00 **mol·kg−1** | | | | *m*B = 0.025 **mol·kg−1** GGG | | | *m*B = 0.05 **mol·kg−1** GGG | | | *m*B = 0.10 **mol·kg−1** GGG | | |
| 0.00000 | 0.997047 | 0.994040 | | 0.990220 | 0.999054 | 0.996018 | 0.992176 | 1.000874 | 0.997811 | 0.993950 | 1.004872 | 1.001754 | 0.997853 |
| 0.00016 | 0.997055 | 0.994046 | | 0.990224 | 0.999061 | 0.996026 | 0.992183 | 1.000887 | 0.997827 | 0.993964 | 1.004880 | 1.001762 | 0.997860 |
| 0.00049 | 0.997069 | 0.994058 | | 0.990234 | 0.999077 | 0.996041 | 0.992200 | 1.000920 | 0.997862 | 0.993996 | 1.004898 | 1.001779 | 0.997875 |
| 0.00082 | 0.997083 | 0.994070 | | 0.990243 | 0.999091 | 0.996056 | 0.992215 | 1.000953 | 0.997897 | 0.994029 | 1.004914 | 1.001796 | 0.997891 |
| 0.00098 | 0.997091 | 0.994076 | | 0.990247 | 0.999099 | 0.996064 | 0.992223 | 1.000968 | 0.997914 | 0.994045 | 1.004924 | 1.001805 | 0.997898 |
| 0.00115 | 0.997097 | 0.994082 | | 0.990253 | 0.999106 | 0.996071 | 0.992232 | 1.000985 | 0.997933 | 0.994061 | 1.004932 | 1.001814 | 0.997906 |
| 0.00132 | 0.997105 | 0.994088 | | 0.990257 | 0.999114 | 0.996079 | 0.992240 | 1.001001 | 0.997949 | 0.994077 | 1.004939 | 1.001822 | 0.997913 |
| 0.00147 | 0.997112 | 0.994094 | | 0.990262 | 0.999119 | 0.996086 | 0.992248 | 1.001011 | 0.997961 | 0.994091 | 1.004944 | 1.001826 | 0.997919 |
| 0.00164 | 0.997116 | 0.994100 | | 0.990266 | 0.999123 | 0.996090 | 0.992253 | 1.001021 | 0.997970 | 0.994100 | 1.004949 | 1.001830 | 0.997923 |
| 0.00197 | 0.997122 | 0.994104 | | 0.990272 | 0.999132 | 0.996097 | 0.992261 | 1.001043 | 0.997987 | 0.994117 | 1.004959 | 1.001839 | 0.997931 |
| 0.00230 | 0.997128 | 0.994109 | | 0.990276 | 0.999140 | 0.996105 | 0.992269 | 1.001064 | 0.998006 | 0.994135 | 1.004969 | 1.001847 | 0.997939 |
| 0.00263 | 0.997133 | 0.994113 | | 0.990280 | 0.999149 | 0.996113 | 0.992277 | 1.001084 | 0.998022 | 0.994152 | 1.004979 | 1.001855 | 0.997947 |
| 0.00296 | 0.997139 | 0.994117 | | 0.990283 | 0.999158 | 0.996121 | 0.992284 | 1.001107 | 0.998040 | 0.994170 | 1.004988 | 1.001864 | 0.997956 |
| 0.00328 | 0.997144 | 0.994121 | | 0.990287 | 0.999167 | 0.996128 | 0.992292 | 1.001128 | 0.998057 | 0.994187 | 1.004998 | 1.001872 | 0.997964 |
|  |  |  | |  |  |  |  |  |  |  |  |  |  |
| *α*PMZ = 0.6 | | | | | | | | | | | | | |
|  | *m*B = 0.00 **mol·kg−1** | | | | *m*B = 0.025 **mol·kg−1** GGG | | | *m*B = 0.05 **mol·kg−1** GGG | | | *m*B = 0.10 **mol·kg−1** GGG | | |
| 0.00000 | 0.997047 | 0.994040 | | 0.990220 | 0.999054 | 0.996018 | 0.992176 | 1.000874 | 0.997811 | 0.993950 | 1.004872 | 1.001754 | 0.997853 |
| 0.00024 | 0.997061 | 0.994051 | | 0.990229 | 0.999066 | 0.996029 | 0.992187 | 1.000896 | 0.997833 | 0.993972 | 1.004892 | 1.001772 | 0.997867 |
| 0.00072 | 0.997087 | 0.994075 | | 0.990248 | 0.999095 | 0.996054 | 0.992211 | 1.000945 | 0.997879 | 0.994018 | 1.004935 | 1.001809 | 0.997900 |
| 0.00120 | 0.997115 | 0.994101 | | 0.990268 | 0.999120 | 0.996079 | 0.992235 | 1.000994 | 0.997925 | 0.994064 | 1.004981 | 1.001847 | 0.997931 |
| 0.00144 | 0.997129 | 0.994112 | | 0.990276 | 0.999132 | 0.996092 | 0.992248 | 1.001018 | 0.997947 | 0.994087 | 1.005001 | 1.001866 | 0.997951 |
| 0.00168 | 0.997140 | 0.994124 | | 0.990287 | 0.999148 | 0.996102 | 0.992259 | 1.001042 | 0.997969 | 0.994111 | 1.005022 | 1.001883 | 0.997965 |
| 0.00193 | 0.997153 | 0.994138 | | 0.990296 | 0.999161 | 0.996114 | 0.992271 | 1.001061 | 0.997993 | 0.994133 | 1.005031 | 1.001897 | 0.997981 |
| 0.00216 | 0.997166 | 0.994148 | | 0.990305 | 0.999166 | 0.996124 | 0.992281 | 1.001074 | 0.998006 | 0.994151 | 1.005037 | 1.001906 | 0.997987 |
| 0.00240 | 0.997174 | 0.994157 | | 0.990314 | 0.999175 | 0.996132 | 0.992289 | 1.001088 | 0.998019 | 0.994162 | 1.005048 | 1.001914 | 0.997992 |
| 0.00288 | 0.997191 | 0.994173 | | 0.990326 | 0.999190 | 0.996147 | 0.992303 | 1.001115 | 0.998045 | 0.994185 | 1.005065 | 1.001931 | 0.998006 |
| 0.00337 | 0.997208 | 0.994190 | | 0.990336 | 0.999207 | 0.996163 | 0.992316 | 1.001143 | 0.998072 | 0.994208 | 1.005084 | 1.001947 | 0.998019 |
| 0.00385 | 0.997225 | 0.994206 | | 0.990346 | 0.999222 | 0.996178 | 0.992330 | 1.001173 | 0.998102 | 0.994231 | 1.005100 | 1.001964 | 0.998030 |
| 0.00433 | 0.997242 | 0.994222 | | 0.990357 | 0.999237 | 0.996194 | 0.992343 | 1.001198 | 0.998126 | 0.994256 | 1.005118 | 1.001980 | 0.998042 |
| 0.00480 | 0.997259 | 0.994237 | | 0.990369 | 0.999252 | 0.996208 | 0.992357 | 1.001226 | 0.998151 | 0.994277 | 1.005135 | 1.001998 | 0.998056 |
|  |  |  | |  |  |  |  |  |  |  |  |  |  |
| *α*PMZ = 0.8 | | | | | | | | | | | | | |
|  | *m*B = 0.00 **mol·kg−1** | | | | *m*B = 0.025 **mol·kg−1** GGG | | | *m*B = 0.05 **mol·kg−1** GGG | | | *m*B = 0.10 **mol·kg−1** GGG | | |
| 0.00000 | 0.997047 | 0.994040 | | 0.990220 | 0.999054 | 0.996018 | 0.992176 | 1.000874 | 0.997811 | 0.993950 | 1.004872 | 1.001754 | 0.997853 |
| 0.00045 | 0.997071 | 0.994062 | | 0.990240 | 0.999087 | 0.996050 | 0.992204 | 1.000913 | 0.997849 | 0.993985 | 1.004897 | 1.001784 | 0.997879 |
| 0.00136 | 0.997128 | 0.994114 | | 0.990290 | 0.999157 | 0.996117 | 0.992269 | 1.000996 | 0.997927 | 0.994065 | 1.004959 | 1.001845 | 0.997936 |
| 0.00225 | 0.997189 | 0.994164 | | 0.990340 | 0.999221 | 0.996183 | 0.992329 | 1.001081 | 0.998006 | 0.994140 | 1.005020 | 1.001906 | 0.997991 |
| 0.00270 | 0.997213 | 0.994192 | | 0.990361 | 0.999254 | 0.996214 | 0.992356 | 1.001117 | 0.998048 | 0.994178 | 1.005046 | 1.001937 | 0.998020 |
| 0.00315 | 0.997241 | 0.994214 | | 0.990391 | 0.999281 | 0.996248 | 0.992387 | 1.001147 | 0.998080 | 0.994218 | 1.005067 | 1.001958 | 0.998050 |
| 0.00361 | 0.997274 | 0.994238 | | 0.990417 | 0.999300 | 0.996275 | 0.992420 | 1.001171 | 0.998104 | 0.994246 | 1.005087 | 1.001976 | 0.998064 |
| 0.00405 | 0.997294 | 0.994267 | | 0.990438 | 0.999318 | 0.996291 | 0.992450 | 1.001198 | 0.998126 | 0.994270 | 1.005106 | 1.001992 | 0.998081 |
| 0.00450 | 0.997311 | 0.994287 | | 0.990460 | 0.999337 | 0.996308 | 0.992464 | 1.001224 | 0.998153 | 0.994294 | 1.005125 | 1.002009 | 0.998097 |
| 0.00540 | 0.997351 | 0.994328 | | 0.990488 | 0.999375 | 0.996340 | 0.992494 | 1.001275 | 0.998201 | 0.994339 | 1.005162 | 1.002044 | 0.998129 |
| 0.00631 | 0.997390 | 0.994368 | | 0.990516 | 0.999409 | 0.996371 | 0.992522 | 1.001326 | 0.998253 | 0.994385 | 1.005200 | 1.002075 | 0.998163 |
| 0.00721 | 0.997425 | 0.994407 | | 0.990548 | 0.999447 | 0.996403 | 0.992550 | 1.001375 | 0.998301 | 0.994431 | 1.005237 | 1.002109 | 0.998193 |
| 0.00812 | 0.997464 | 0.994447 | | 0.990577 | 0.999484 | 0.996437 | 0.992580 | 1.001426 | 0.998352 | 0.994479 | 1.005275 | 1.002144 | 0.998226 |
| 0.00901 | 0.997500 | 0.994486 | | 0.990604 | 0.999521 | 0.996467 | 0.992610 | 1.001473 | 0.998402 | 0.994525 | 1.005314 | 1.002177 | 0.998259 |

*m*A, molality of mixed (PMZ + CTAB) system.

*m*B, molalities of glycine, glycylglycine and glycylglycylglycine.

**Standard uncertainties: u(*T*) = 0.20 K, u(*m*) = 0.04 mol·kg−1, u(*α*) = 0.26, u (*ρ*) = 0.14 (kg·m-3) (0.95 level of confidence).**

**Table S5**

The sound velocities, *u* of PMZ and CTAB, and their mixtures in glycine(aq), glycylglycine(aq) and glycylglycylglycine(aq) solutions as a function of temperature.

| *u* (**m·s−1**) | | | | | | | | | | | | | |
| --- | --- | --- | --- | --- | --- | --- | --- | --- | --- | --- | --- | --- | --- |
| *m*A  (mol**·**kg−1) | *T*(K)=298.15 | | 308.15 | 318.15 | 298.15 | 308.15 | 318.15 | 298.15 | 308.15 | 318.15 | 298.15 | 308.15 | 318.15 |
| PMZ | | | | | | | | | | | | | |
|  | *m*B = 0.00 **mol·kg−1** | | | | *m*B = 0.025 **mol·kg−1** G | | | *m*B = 0.05 **mol·kg−1** G | | | *m*B = 0.10 **mol·kg−1** G | | |
| 0.00000 | 1496.78 | 1519.80 | | 1536.46 | 1497.33 | 1519.88 | 1536.38 | 1498.71 | 1521.17 | 1537.61 | 1502.02 | 1524.44 | 1540.82 |
| 0.00352 | 1497.34 | 1520.33 | | 1536.83 | 1497.94 | 1520.33 | 1536.87 | 1499.21 | 1521.66 | 1537.96 | 1502.47 | 1524.82 | 1541.19 |
| 0.01053 | 1498.65 | 1521.30 | | 1537.66 | 1499.21 | 1521.41 | 1537.77 | 1500.40 | 1522.78 | 1538.81 | 1503.55 | 1525.60 | 1541.90 |
| 0.01748 | 1499.84 | 1522.23 | | 1538.57 | 1500.37 | 1522.52 | 1538.68 | 1501.60 | 1523.80 | 1539.63 | 1504.58 | 1526.39 | 1542.63 |
| 0.02097 | 1500.57 | 1522.71 | | 1539.02 | 1500.93 | 1523.06 | 1539.12 | 1502.18 | 1524.31 | 1540.09 | 1505.10 | 1526.80 | 1542.97 |
| 0.02450 | 1501.18 | 1523.29 | | 1539.40 | 1501.49 | 1523.54 | 1539.49 | 1502.79 | 1524.88 | 1540.45 | 1505.66 | 1527.17 | 1543.34 |
| 0.02805 | 1501.70 | 1523.77 | | 1539.81 | 1502.09 | 1524.08 | 1540.01 | 1503.40 | 1525.42 | 1540.86 | 1506.17 | 1527.55 | 1543.66 |
| 0.03148 | 1502.34 | 1524.32 | | 1540.26 | 1502.68 | 1524.59 | 1540.40 | 1503.88 | 1525.96 | 1541.05 | 1506.54 | 1527.94 | 1543.88 |
| 0.03497 | 1502.89 | 1524.79 | | 1540.51 | 1502.96 | 1524.94 | 1540.64 | 1504.22 | 1526.22 | 1541.25 | 1506.88 | 1528.11 | 1544.09 |
| 0.04198 | 1503.50 | 1525.36 | | 1541.24 | 1503.60 | 1525.50 | 1541.22 | 1504.94 | 1526.73 | 1541.68 | 1507.48 | 1528.52 | 1544.51 |
| 0.04896 | 1504.18 | 1525.99 | | 1541.74 | 1504.14 | 1526.07 | 1541.78 | 1505.55 | 1527.21 | 1542.09 | 1508.07 | 1528.93 | 1544.97 |
| 0.05594 | 1504.82 | 1526.69 | | 1542.34 | 1504.78 | 1526.59 | 1542.33 | 1506.27 | 1527.72 | 1542.48 | 1508.67 | 1529.34 | 1545.38 |
| 0.06301 | 1505.41 | 1527.26 | | 1542.98 | 1505.37 | 1527.15 | 1542.82 | 1506.95 | 1528.26 | 1542.91 | 1509.32 | 1529.78 | 1545.82 |
| 0.07000 | 1506.08 | 1527.88 | | 1543.64 | 1505.97 | 1527.68 | 1543.37 | 1507.64 | 1528.75 | 1543.30 | 1509.98 | 1530.21 | 1546.25 |
|  |  |  | |  |  |  |  |  |  |  |  |  |  |
| CTAB | | | | | | | | | | | | | |
|  | *m*B = 0.00 **mol·kg−1** | | | | *m*B = 0.025 **mol·kg−1** G | | | *m*B = 0.05 **mol·kg−1** G | | | *m*B = 0.10 **mol·kg−1** G | | |
| 0.00000 | 1496.78 | 1519.80 | | 1536.46 | 1497.33 | 1519.88 | 1536.38 | 1498.71 | 1521.17 | 1537.61 | 1502.02 | 1524.44 | 1540.82 |
| 0.00010 | 1496.82 | 1519.85 | | 1536.51 | 1497.35 | 1519.89 | 1536.39 | 1498.73 | 1521.19 | 1537.62 | 1502.08 | 1524.46 | 1540.86 |
| 0.00030 | 1496.89 | 1519.93 | | 1536.59 | 1497.40 | 1519.92 | 1536.41 | 1498.78 | 1521.22 | 1537.65 | 1502.17 | 1524.50 | 1540.92 |
| 0.00051 | 1496.96 | 1520.02 | | 1536.70 | 1497.44 | 1519.95 | 1536.43 | 1498.83 | 1521.26 | 1537.68 | 1502.26 | 1524.54 | 1540.98 |
| 0.00060 | 1497.00 | 1520.06 | | 1536.74 | 1497.46 | 1519.96 | 1536.44 | 1498.85 | 1521.28 | 1537.70 | 1502.32 | 1524.56 | 1541.01 |
| 0.00074 | 1497.04 | 1520.12 | | 1536.80 | 1497.49 | 1519.98 | 1536.45 | 1498.88 | 1521.30 | 1537.72 | 1502.37 | 1524.58 | 1541.04 |
| 0.00080 | 1497.06 | 1520.15 | | 1536.83 | 1497.50 | 1519.99 | 1536.46 | 1498.89 | 1521.31 | 1537.73 | 1502.42 | 1524.60 | 1541.07 |
| 0.00090 | 1497.10 | 1520.19 | | 1536.88 | 1497.53 | 1520.00 | 1536.47 | 1498.92 | 1521.33 | 1537.74 | 1502.47 | 1524.62 | 1541.11 |
| 0.00101 | 1497.14 | 1520.24 | | 1536.93 | 1497.54 | 1520.02 | 1536.48 | 1498.93 | 1521.35 | 1537.75 | 1502.49 | 1524.64 | 1541.13 |
| 0.00120 | 1497.17 | 1520.30 | | 1537.02 | 1497.56 | 1520.03 | 1536.49 | 1498.95 | 1521.37 | 1537.78 | 1502.56 | 1524.65 | 1541.18 |
| 0.00141 | 1497.20 | 1520.34 | | 1537.07 | 1497.58 | 1520.04 | 1536.50 | 1498.97 | 1521.38 | 1537.79 | 1502.63 | 1524.66 | 1541.22 |
| 0.00160 | 1497.23 | 1520.38 | | 1537.11 | 1497.60 | 1520.05 | 1536.51 | 1498.98 | 1521.40 | 1537.81 | 1502.70 | 1524.68 | 1541.27 |
| 0.00181 | 1497.27 | 1520.43 | | 1537.16 | 1497.62 | 1520.06 | 1536.51 | 1499.00 | 1521.42 | 1537.82 | 1502.77 | 1524.70 | 1541.31 |
| 0.00200 | 1497.30 | 1520.47 | | 1537.20 | 1497.64 | 1520.07 | 1536.52 | 1499.02 | 1521.44 | 1537.84 | 1502.84 | 1524.72 | 1541.35 |
|  |  |  | |  |  |  |  |  |  |  |  |  |  |
| *α*PMZ = 0.2 | | | | | | | | | | | | | |
|  | *m*B = 0.00 **mol·kg−1** | | | | *m*B = 0.025 **mol·kg−1** G | | | *m*B = 0.05 **mol·kg−1** G | | | *m*B = 0.10 **mol·kg−1** G | | |
| 0.00000 | 1496.78 | 1519.80 | | 1536.46 | 1497.33 | 1519.88 | 1536.38 | 1498.71 | 1521.17 | 1537.61 | 1502.02 | 1524.44 | 1540.82 |
| 0.00012 | 1496.85 | 1519.83 | | 1536.48 | 1497.36 | 1519.90 | 1536.39 | 1498.73 | 1521.19 | 1537.63 | 1502.04 | 1524.46 | 1540.84 |
| 0.00037 | 1496.99 | 1519.89 | | 1536.53 | 1497.42 | 1519.93 | 1536.42 | 1498.78 | 1521.23 | 1537.67 | 1502.07 | 1524.49 | 1540.87 |
| 0.00062 | 1497.13 | 1519.94 | | 1536.58 | 1497.47 | 1519.96 | 1536.45 | 1498.83 | 1521.27 | 1537.70 | 1502.10 | 1524.53 | 1540.89 |
| 0.00074 | 1497.20 | 1519.97 | | 1536.60 | 1497.50 | 1519.98 | 1536.46 | 1498.85 | 1521.29 | 1537.72 | 1502.12 | 1524.55 | 1540.91 |
| 0.00087 | 1497.28 | 1520.00 | | 1536.63 | 1497.53 | 1520.00 | 1536.48 | 1498.87 | 1521.31 | 1537.74 | 1502.13 | 1524.57 | 1540.93 |
| 0.00100 | 1497.35 | 1520.03 | | 1536.65 | 1497.56 | 1520.01 | 1536.49 | 1498.90 | 1521.33 | 1537.76 | 1502.15 | 1524.59 | 1540.94 |
| 0.00112 | 1497.41 | 1520.06 | | 1536.68 | 1497.59 | 1520.03 | 1536.51 | 1498.92 | 1521.35 | 1537.77 | 1502.16 | 1524.61 | 1540.95 |
| 0.00124 | 1497.45 | 1520.09 | | 1536.70 | 1497.60 | 1520.05 | 1536.52 | 1498.93 | 1521.36 | 1537.79 | 1502.16 | 1524.62 | 1540.97 |
| 0.00149 | 1497.49 | 1520.11 | | 1536.74 | 1497.63 | 1520.06 | 1536.54 | 1498.94 | 1521.38 | 1537.81 | 1502.18 | 1524.63 | 1540.98 |
| 0.00175 | 1497.54 | 1520.14 | | 1536.76 | 1497.65 | 1520.08 | 1536.55 | 1498.95 | 1521.39 | 1537.82 | 1502.19 | 1524.64 | 1541.00 |
| 0.00200 | 1497.57 | 1520.17 | | 1536.78 | 1497.68 | 1520.09 | 1536.56 | 1498.97 | 1521.41 | 1537.84 | 1502.20 | 1524.66 | 1541.01 |
| 0.00225 | 1497.61 | 1520.19 | | 1536.80 | 1497.70 | 1520.11 | 1536.57 | 1498.98 | 1521.42 | 1537.85 | 1502.22 | 1524.67 | 1541.02 |
| 0.00248 | 1497.65 | 1520.22 | | 1536.82 | 1497.72 | 1520.12 | 1536.58 | 1499.00 | 1521.44 | 1537.86 | 1502.23 | 1524.68 | 1541.03 |
|  |  |  | |  |  |  |  |  |  |  |  |  |  |
| *α*PMZ = 0.4 | | | | | | | | | | | | | |
|  | *m*B = 0.00 **mol·kg−1** | | | | *m*B = 0.025 **mol·kg−1** G | | | *m*B = 0.05 **mol·kg−1** G | | | *m*B = 0.10 **mol·kg−1** G | | |
| 0.00000 | 1496.78 | 1519.80 | | 1536.46 | 1497.33 | 1519.88 | 1536.38 | 1498.71 | 1521.17 | 1537.61 | 1502.02 | 1524.44 | 1540.82 |
| 0.00016 | 1496.84 | 1519.82 | | 1536.47 | 1497.37 | 1519.90 | 1536.41 | 1498.74 | 1521.19 | 1537.63 | 1502.03 | 1524.46 | 1540.84 |
| 0.00049 | 1496.97 | 1519.87 | | 1536.50 | 1497.44 | 1519.95 | 1536.47 | 1498.80 | 1521.24 | 1537.67 | 1502.06 | 1524.50 | 1540.86 |
| 0.00082 | 1497.11 | 1519.93 | | 1536.54 | 1497.51 | 1520.01 | 1536.53 | 1498.86 | 1521.29 | 1537.71 | 1502.08 | 1524.54 | 1540.89 |
| 0.00098 | 1497.18 | 1519.95 | | 1536.55 | 1497.54 | 1520.03 | 1536.56 | 1498.89 | 1521.31 | 1537.73 | 1502.10 | 1524.56 | 1540.90 |
| 0.00115 | 1497.25 | 1519.98 | | 1536.57 | 1497.58 | 1520.06 | 1536.59 | 1498.92 | 1521.34 | 1537.75 | 1502.11 | 1524.58 | 1540.91 |
| 0.00132 | 1497.31 | 1520.01 | | 1536.58 | 1497.61 | 1520.08 | 1536.62 | 1498.95 | 1521.36 | 1537.77 | 1502.12 | 1524.59 | 1540.93 |
| 0.00147 | 1497.38 | 1520.03 | | 1536.60 | 1497.65 | 1520.11 | 1536.65 | 1498.97 | 1521.38 | 1537.79 | 1502.13 | 1524.61 | 1540.94 |
| 0.00164 | 1497.42 | 1520.06 | | 1536.61 | 1497.66 | 1520.13 | 1536.68 | 1498.98 | 1521.40 | 1537.81 | 1502.14 | 1524.62 | 1540.95 |
| 0.00197 | 1497.48 | 1520.08 | | 1536.63 | 1497.70 | 1520.16 | 1536.71 | 1499.00 | 1521.41 | 1537.82 | 1502.15 | 1524.64 | 1540.96 |
| 0.00230 | 1497.54 | 1520.10 | | 1536.65 | 1497.74 | 1520.18 | 1536.73 | 1499.02 | 1521.43 | 1537.83 | 1502.17 | 1524.65 | 1540.97 |
| 0.00263 | 1497.59 | 1520.12 | | 1536.66 | 1497.77 | 1520.21 | 1536.75 | 1499.04 | 1521.45 | 1537.85 | 1502.18 | 1524.67 | 1540.99 |
| 0.00296 | 1497.65 | 1520.14 | | 1536.68 | 1497.81 | 1520.23 | 1536.78 | 1499.06 | 1521.46 | 1537.86 | 1502.19 | 1524.68 | 1541.00 |
| 0.00328 | 1497.71 | 1520.16 | | 1536.69 | 1497.84 | 1520.26 | 1536.80 | 1499.08 | 1521.48 | 1537.87 | 1502.21 | 1524.70 | 1541.01 |
|  |  |  | |  |  |  |  |  |  |  |  |  |  |
| *α*PMZ=0.6 | | | | | | | | | | | | | |
|  | *m*B = 0.00 **mol·kg−1** | | | | *m*B = 0.025 **mol·kg−1** G | | | *m*B = 0.05 **mol·kg−1** G | | | *m*B = 0.10 **mol·kg−1** G | | |
| 0.00000 | 1496.78 | 1519.80 | | 1536.46 | 1497.33 | 1519.88 | 1536.38 | 1498.71 | 1521.17 | 1537.61 | 1502.02 | 1524.44 | 1540.82 |
| 0.00024 | 1496.84 | 1519.83 | | 1536.48 | 1497.37 | 1519.92 | 1536.41 | 1498.75 | 1521.20 | 1537.64 | 1502.04 | 1524.46 | 1540.84 |
| 0.00072 | 1496.97 | 1519.89 | | 1536.52 | 1497.45 | 1519.99 | 1536.47 | 1498.85 | 1521.26 | 1537.70 | 1502.07 | 1524.51 | 1540.87 |
| 0.00120 | 1497.10 | 1519.96 | | 1536.56 | 1497.53 | 1520.06 | 1536.53 | 1498.94 | 1521.32 | 1537.76 | 1502.11 | 1524.56 | 1540.89 |
| 0.00144 | 1497.16 | 1519.99 | | 1536.58 | 1497.57 | 1520.10 | 1536.56 | 1498.99 | 1521.35 | 1537.79 | 1502.13 | 1524.58 | 1540.91 |
| 0.00168 | 1497.23 | 1520.03 | | 1536.60 | 1497.61 | 1520.14 | 1536.59 | 1499.04 | 1521.38 | 1537.82 | 1502.15 | 1524.61 | 1540.92 |
| 0.00193 | 1497.30 | 1520.06 | | 1536.62 | 1497.65 | 1520.18 | 1536.62 | 1499.07 | 1521.41 | 1537.85 | 1502.16 | 1524.63 | 1540.93 |
| 0.00216 | 1497.34 | 1520.09 | | 1536.64 | 1497.68 | 1520.21 | 1536.65 | 1499.09 | 1521.43 | 1537.88 | 1502.16 | 1524.64 | 1540.95 |
| 0.00240 | 1497.38 | 1520.11 | | 1536.66 | 1497.70 | 1520.23 | 1536.67 | 1499.10 | 1521.44 | 1537.89 | 1502.17 | 1524.65 | 1540.95 |
| 0.00288 | 1497.43 | 1520.14 | | 1536.68 | 1497.75 | 1520.25 | 1536.69 | 1499.13 | 1521.47 | 1537.91 | 1502.18 | 1524.66 | 1540.97 |
| 0.00337 | 1497.50 | 1520.17 | | 1536.70 | 1497.79 | 1520.28 | 1536.72 | 1499.16 | 1521.50 | 1537.94 | 1502.19 | 1524.68 | 1540.98 |
| 0.00385 | 1497.56 | 1520.20 | | 1536.72 | 1497.84 | 1520.31 | 1536.74 | 1499.20 | 1521.53 | 1537.96 | 1502.20 | 1524.69 | 1540.99 |
| 0.00433 | 1497.61 | 1520.23 | | 1536.74 | 1497.88 | 1520.33 | 1536.77 | 1499.23 | 1521.56 | 1537.98 | 1502.21 | 1524.71 | 1541.01 |
| 0.00480 | 1497.67 | 1520.26 | | 1536.76 | 1497.92 | 1520.36 | 1536.79 | 1499.26 | 1521.58 | 1538.00 | 1502.22 | 1524.72 | 1541.02 |
|  |  |  | |  |  |  |  |  |  |  |  |  |  |
| *α*PMZ=0.8 | | | | | | | | | | | | | |
|  | *m*B = 0.00 **mol·kg−1** | | | | *m*B = 0.025 **mol·kg−1** G | | | *m*B = 0.05 **mol·kg−1** G | | | *m*B = 0.10 **mol·kg−1** G | | |
| 0.00000 | 1496.78 | 1519.80 | | 1536.46 | 1497.33 | 1519.88 | 1536.38 | 1498.71 | 1521.17 | 1537.61 | 1502.02 | 1524.44 | 1540.82 |
| 0.00045 | 1496.89 | 1519.86 | | 1536.51 | 1497.42 | 1519.96 | 1536.44 | 1498.78 | 1521.24 | 1537.67 | 1502.07 | 1524.47 | 1540.85 |
| 0.00136 | 1497.11 | 1520.00 | | 1536.61 | 1497.61 | 1520.11 | 1536.56 | 1498.94 | 1521.40 | 1537.80 | 1502.17 | 1524.55 | 1540.90 |
| 0.00225 | 1497.35 | 1520.14 | | 1536.72 | 1497.80 | 1520.28 | 1536.68 | 1499.09 | 1521.56 | 1537.92 | 1502.27 | 1524.62 | 1540.95 |
| 0.00270 | 1497.46 | 1520.21 | | 1536.77 | 1497.89 | 1520.34 | 1536.74 | 1499.17 | 1521.64 | 1537.97 | 1502.32 | 1524.65 | 1540.97 |
| 0.00315 | 1497.57 | 1520.28 | | 1536.82 | 1497.98 | 1520.42 | 1536.81 | 1499.25 | 1521.71 | 1538.04 | 1502.37 | 1524.69 | 1541.00 |
| 0.00361 | 1497.69 | 1520.36 | | 1536.88 | 1498.06 | 1520.51 | 1536.87 | 1499.30 | 1521.79 | 1538.10 | 1502.39 | 1524.72 | 1541.02 |
| 0.00405 | 1497.75 | 1520.42 | | 1536.93 | 1498.11 | 1520.57 | 1536.93 | 1499.34 | 1521.82 | 1538.17 | 1502.41 | 1524.74 | 1541.04 |
| 0.00450 | 1497.81 | 1520.46 | | 1536.97 | 1498.16 | 1520.60 | 1536.97 | 1499.39 | 1521.85 | 1538.19 | 1502.42 | 1524.75 | 1541.05 |
| 0.00540 | 1497.91 | 1520.53 | | 1537.03 | 1498.25 | 1520.68 | 1537.04 | 1499.47 | 1521.91 | 1538.24 | 1502.45 | 1524.78 | 1541.07 |
| 0.00631 | 1498.02 | 1520.61 | | 1537.08 | 1498.35 | 1520.77 | 1537.11 | 1499.56 | 1521.98 | 1538.29 | 1502.49 | 1524.81 | 1541.08 |
| 0.00721 | 1498.13 | 1520.69 | | 1537.14 | 1498.45 | 1520.84 | 1537.18 | 1499.64 | 1522.04 | 1538.35 | 1502.52 | 1524.84 | 1541.10 |
| 0.00812 | 1498.24 | 1520.76 | | 1537.19 | 1498.55 | 1520.92 | 1537.25 | 1499.73 | 1522.10 | 1538.40 | 1502.55 | 1524.87 | 1541.12 |
| 0.00901 | 1498.35 | 1520.84 | | 1537.25 | 1498.64 | 1521.00 | 1537.32 | 1499.81 | 1522.16 | 1538.45 | 1502.58 | 1524.90 | 1541.14 |
|  |  |  | |  |  |  |  |  |  |  |  |  |  |
| PMZ | | | | | | | | | | | | | |
|  | *m*B = 0.00 **mol·kg−1** | | | | *m*B = 0.025 **mol·kg−1** GG | | | *m*B = 0.05 **mol·kg−1** GG | | | *m*B = 0.10 **mol·kg−1** GG | | |
| 0.00000 | 1496.78 | 1519.80 | | 1536.46 | 1499.63 | 1522.22 | 1538.74 | 1501.26 | 1523.72 | 1540.12 | 1505.72 | 1527.90 | 1544.05 |
| 0.00352 | 1497.34 | 1520.33 | | 1536.83 | 1500.13 | 1522.67 | 1539.15 | 1501.90 | 1524.22 | 1540.55 | 1506.30 | 1528.39 | 1544.36 |
| 0.01053 | 1498.65 | 1521.30 | | 1537.66 | 1501.17 | 1523.54 | 1539.97 | 1502.99 | 1525.21 | 1541.47 | 1507.41 | 1529.31 | 1545.29 |
| 0.01748 | 1499.84 | 1522.23 | | 1538.57 | 1502.18 | 1524.39 | 1540.78 | 1504.15 | 1526.25 | 1542.34 | 1508.49 | 1530.21 | 1546.17 |
| 0.02097 | 1500.57 | 1522.71 | | 1539.02 | 1502.63 | 1524.84 | 1541.20 | 1504.67 | 1526.64 | 1542.87 | 1509.13 | 1530.63 | 1546.62 |
| 0.02450 | 1501.18 | 1523.29 | | 1539.40 | 1503.19 | 1525.26 | 1541.58 | 1505.20 | 1527.18 | 1543.32 | 1509.59 | 1531.13 | 1547.03 |
| 0.02805 | 1501.70 | 1523.77 | | 1539.81 | 1503.69 | 1525.66 | 1541.98 | 1505.88 | 1527.68 | 1543.69 | 1510.15 | 1531.53 | 1547.38 |
| 0.03148 | 1502.34 | 1524.32 | | 1540.26 | 1504.16 | 1526.09 | 1542.26 | 1506.25 | 1528.13 | 1544.02 | 1510.46 | 1531.91 | 1547.71 |
| 0.03497 | 1502.89 | 1524.79 | | 1540.51 | 1504.53 | 1526.44 | 1542.55 | 1506.61 | 1528.43 | 1544.36 | 1510.79 | 1532.19 | 1547.96 |
| 0.04198 | 1503.50 | 1525.36 | | 1541.24 | 1505.23 | 1527.14 | 1543.11 | 1507.45 | 1529.11 | 1544.94 | 1511.50 | 1532.91 | 1548.58 |
| 0.04896 | 1504.18 | 1525.99 | | 1541.74 | 1505.90 | 1527.76 | 1543.66 | 1508.24 | 1529.76 | 1545.55 | 1512.10 | 1533.51 | 1549.16 |
| 0.05594 | 1504.82 | 1526.69 | | 1542.34 | 1506.60 | 1528.41 | 1544.22 | 1508.98 | 1530.45 | 1546.21 | 1512.74 | 1534.14 | 1549.71 |
| 0.06301 | 1505.41 | 1527.26 | | 1542.98 | 1507.27 | 1529.11 | 1544.79 | 1509.75 | 1531.09 | 1546.86 | 1513.37 | 1534.82 | 1550.31 |
| 0.07000 | 1506.08 | 1527.88 | | 1543.64 | 1507.94 | 1529.80 | 1545.38 | 1510.48 | 1531.82 | 1547.45 | 1514.11 | 1535.43 | 1550.90 |
|  |  |  | |  |  |  |  |  |  |  |  |  |  |
| CTAB | | | | | | | | | | | | | |
|  | *m*B = 0.00 **mol·kg−1** | | | | *m*B = 0.025 **mol·kg−1** GG | | | *m*B = 0.05 **mol·kg−1** GG | | | *m*B = 0.10 **mol·kg−1** GG | | |
| 0.00000 | 1496.78 | 1519.80 | | 1536.46 | 1499.63 | 1522.22 | 1538.74 | 1501.26 | 1523.72 | 1540.12 | 1505.72 | 1527.90 | 1544.05 |
| 0.00010 | 1496.82 | 1519.85 | | 1536.51 | 1499.65 | 1522.33 | 1538.78 | 1501.29 | 1523.75 | 1540.14 | 1505.74 | 1527.99 | 1544.06 |
| 0.00030 | 1496.89 | 1519.93 | | 1536.59 | 1499.70 | 1522.57 | 1538.88 | 1501.36 | 1523.82 | 1540.19 | 1505.77 | 1528.16 | 1544.09 |
| 0.00051 | 1496.96 | 1520.02 | | 1536.70 | 1499.74 | 1522.80 | 1538.99 | 1501.43 | 1523.89 | 1540.24 | 1505.80 | 1528.34 | 1544.11 |
| 0.00060 | 1497.00 | 1520.06 | | 1536.74 | 1499.76 | 1522.91 | 1539.04 | 1501.47 | 1523.92 | 1540.26 | 1505.82 | 1528.42 | 1544.12 |
| 0.00074 | 1497.04 | 1520.12 | | 1536.80 | 1499.79 | 1523.06 | 1539.09 | 1501.51 | 1523.97 | 1540.29 | 1505.84 | 1528.53 | 1544.14 |
| 0.00080 | 1497.06 | 1520.15 | | 1536.83 | 1499.80 | 1523.14 | 1539.12 | 1501.53 | 1523.99 | 1540.30 | 1505.85 | 1528.59 | 1544.15 |
| 0.00090 | 1497.10 | 1520.19 | | 1536.88 | 1499.82 | 1523.24 | 1539.18 | 1501.56 | 1524.02 | 1540.33 | 1505.86 | 1528.68 | 1544.16 |
| 0.00101 | 1497.14 | 1520.24 | | 1536.93 | 1499.83 | 1523.35 | 1539.22 | 1501.58 | 1524.05 | 1540.35 | 1505.87 | 1528.71 | 1544.17 |
| 0.00120 | 1497.17 | 1520.30 | | 1537.02 | 1499.85 | 1523.44 | 1539.29 | 1501.61 | 1524.08 | 1540.38 | 1505.88 | 1528.79 | 1544.18 |
| 0.00141 | 1497.20 | 1520.34 | | 1537.07 | 1499.88 | 1523.56 | 1539.35 | 1501.64 | 1524.11 | 1540.40 | 1505.89 | 1528.88 | 1544.19 |
| 0.00160 | 1497.23 | 1520.38 | | 1537.11 | 1499.90 | 1523.65 | 1539.39 | 1501.67 | 1524.14 | 1540.42 | 1505.90 | 1528.96 | 1544.20 |
| 0.00181 | 1497.27 | 1520.43 | | 1537.16 | 1499.92 | 1523.77 | 1539.44 | 1501.71 | 1524.17 | 1540.44 | 1505.92 | 1529.05 | 1544.21 |
| 0.00200 | 1497.30 | 1520.47 | | 1537.20 | 1499.94 | 1523.88 | 1539.50 | 1501.73 | 1524.20 | 1540.46 | 1505.93 | 1529.13 | 1544.22 |
|  |  |  | |  |  |  |  |  |  |  |  |  |  |
| *α*PMZ=0.2 | | | | | | | | | | | | | |
|  | *m*B = 0.00 **mol·kg−1** | | | | *m*B = 0.025 **mol·kg−1** GG | | | *m*B = 0.05 **mol·kg−1** GG | | | *m*B = 0.10 **mol·kg−1** GG | | |
| 0.00000 | 1496.78 | 1519.80 | | 1536.46 | 1499.63 | 1522.22 | 1538.74 | 1501.26 | 1523.72 | 1540.12 | 1505.72 | 1527.90 | 1544.05 |
| 0.00012 | 1496.85 | 1519.83 | | 1536.48 | 1499.66 | 1522.33 | 1538.90 | 1501.29 | 1523.74 | 1540.14 | 1505.74 | 1527.93 | 1544.06 |
| 0.00037 | 1496.99 | 1519.89 | | 1536.53 | 1499.73 | 1522.52 | 1539.18 | 1501.34 | 1523.79 | 1540.19 | 1505.77 | 1527.99 | 1544.09 |
| 0.00062 | 1497.13 | 1519.94 | | 1536.58 | 1499.80 | 1522.74 | 1539.46 | 1501.40 | 1523.83 | 1540.23 | 1505.81 | 1528.04 | 1544.11 |
| 0.00074 | 1497.20 | 1519.97 | | 1536.60 | 1499.83 | 1522.83 | 1539.61 | 1501.42 | 1523.85 | 1540.25 | 1505.83 | 1528.07 | 1544.13 |
| 0.00087 | 1497.28 | 1520.00 | | 1536.63 | 1499.86 | 1522.94 | 1539.76 | 1501.45 | 1523.87 | 1540.27 | 1505.85 | 1528.10 | 1544.14 |
| 0.00100 | 1497.35 | 1520.03 | | 1536.65 | 1499.90 | 1523.05 | 1539.91 | 1501.48 | 1523.90 | 1540.29 | 1505.87 | 1528.13 | 1544.15 |
| 0.00112 | 1497.41 | 1520.06 | | 1536.68 | 1499.93 | 1523.15 | 1540.04 | 1501.50 | 1523.92 | 1540.31 | 1505.88 | 1528.16 | 1544.16 |
| 0.00124 | 1497.45 | 1520.09 | | 1536.70 | 1499.95 | 1523.22 | 1540.18 | 1501.51 | 1523.93 | 1540.32 | 1505.89 | 1528.17 | 1544.17 |
| 0.00149 | 1497.49 | 1520.11 | | 1536.74 | 1499.98 | 1523.33 | 1540.32 | 1501.54 | 1523.96 | 1540.34 | 1505.90 | 1528.20 | 1544.18 |
| 0.00175 | 1497.54 | 1520.14 | | 1536.76 | 1500.02 | 1523.44 | 1540.46 | 1501.56 | 1523.98 | 1540.36 | 1505.92 | 1528.23 | 1544.20 |
| 0.00200 | 1497.57 | 1520.17 | | 1536.78 | 1500.06 | 1523.54 | 1540.59 | 1501.59 | 1524.01 | 1540.38 | 1505.94 | 1528.26 | 1544.21 |
| 0.00225 | 1497.61 | 1520.19 | | 1536.80 | 1500.10 | 1523.66 | 1540.72 | 1501.61 | 1524.03 | 1540.40 | 1505.96 | 1528.29 | 1544.22 |
| 0.00248 | 1497.65 | 1520.22 | | 1536.82 | 1500.14 | 1523.76 | 1540.85 | 1501.64 | 1524.05 | 1540.42 | 1505.97 | 1528.32 | 1544.24 |
|  |  |  | |  |  |  |  |  |  |  |  |  |  |
| *α*PMZ=0.4 | | | | | | | | | | | | | |
|  | *m*B = 0.00 **mol·kg−1** | | | | *m*B = 0.025 **mol·kg−1** GG | | | *m*B = 0.05 **mol·kg−1** GG | | | *m*B = 0.10 **mol·kg−1** GG | | |
| 0.00000 | 1496.78 | 1519.80 | | 1536.46 | 1499.63 | 1522.22 | 1538.74 | 1501.26 | 1523.72 | 1540.12 | 1505.72 | 1527.90 | 1544.05 |
| 0.00016 | 1496.84 | 1519.82 | | 1536.47 | 1499.65 | 1522.24 | 1538.78 | 1501.29 | 1523.74 | 1540.14 | 1505.73 | 1527.91 | 1544.06 |
| 0.00049 | 1496.97 | 1519.87 | | 1536.50 | 1499.69 | 1522.32 | 1538.85 | 1501.36 | 1523.79 | 1540.19 | 1505.76 | 1527.93 | 1544.08 |
| 0.00082 | 1497.11 | 1519.93 | | 1536.54 | 1499.73 | 1522.39 | 1538.93 | 1501.42 | 1523.84 | 1540.24 | 1505.79 | 1527.95 | 1544.11 |
| 0.00098 | 1497.18 | 1519.95 | | 1536.55 | 1499.75 | 1522.43 | 1538.97 | 1501.45 | 1523.87 | 1540.26 | 1505.81 | 1527.96 | 1544.12 |
| 0.00115 | 1497.25 | 1519.98 | | 1536.57 | 1499.77 | 1522.47 | 1539.00 | 1501.49 | 1523.90 | 1540.29 | 1505.83 | 1527.97 | 1544.13 |
| 0.00132 | 1497.31 | 1520.01 | | 1536.58 | 1499.79 | 1522.50 | 1539.04 | 1501.52 | 1523.93 | 1540.32 | 1505.84 | 1527.98 | 1544.14 |
| 0.00147 | 1497.38 | 1520.03 | | 1536.60 | 1499.81 | 1522.54 | 1539.08 | 1501.53 | 1523.94 | 1540.34 | 1505.85 | 1527.99 | 1544.15 |
| 0.00164 | 1497.42 | 1520.06 | | 1536.61 | 1499.82 | 1522.57 | 1539.11 | 1501.55 | 1523.95 | 1540.35 | 1505.86 | 1527.99 | 1544.16 |
| 0.00197 | 1497.48 | 1520.08 | | 1536.63 | 1499.84 | 1522.60 | 1539.16 | 1501.58 | 1523.98 | 1540.37 | 1505.87 | 1528.00 | 1544.17 |
| 0.00230 | 1497.54 | 1520.10 | | 1536.65 | 1499.87 | 1522.64 | 1539.21 | 1501.61 | 1524.00 | 1540.39 | 1505.89 | 1528.01 | 1544.18 |
| 0.00263 | 1497.59 | 1520.12 | | 1536.66 | 1499.89 | 1522.69 | 1539.25 | 1501.64 | 1524.02 | 1540.41 | 1505.90 | 1528.02 | 1544.19 |
| 0.00296 | 1497.65 | 1520.14 | | 1536.68 | 1499.91 | 1522.72 | 1539.30 | 1501.67 | 1524.05 | 1540.43 | 1505.92 | 1528.03 | 1544.20 |
| 0.00328 | 1497.71 | 1520.16 | | 1536.69 | 1499.94 | 1522.76 | 1539.34 | 1501.70 | 1524.07 | 1540.45 | 1505.93 | 1528.04 | 1544.22 |
|  |  |  | |  |  |  |  |  |  |  |  |  |  |
| *α*PMZ=0.6 | | | | | | | | | | | | | |
|  | *m*B = 0.00 **mol·kg−1** | | | | *m*B = 0.025 **mol·kg−1** GG | | | *m*B = 0.05 **mol·kg−1** GG | | | *m*B = 0.10 **mol·kg−1** GG | | |
| 0.00000 | 1496.78 | 1519.80 | | 1536.46 | 1499.63 | 1522.22 | 1538.74 | 1501.26 | 1523.72 | 1540.12 | 1505.72 | 1527.90 | 1544.05 |
| 0.00024 | 1496.84 | 1519.83 | | 1536.48 | 1499.67 | 1522.24 | 1538.79 | 1501.29 | 1523.75 | 1540.14 | 1505.75 | 1527.92 | 1544.07 |
| 0.00072 | 1496.97 | 1519.89 | | 1536.52 | 1499.73 | 1522.30 | 1538.88 | 1501.37 | 1523.80 | 1540.18 | 1505.80 | 1527.96 | 1544.11 |
| 0.00120 | 1497.10 | 1519.96 | | 1536.56 | 1499.80 | 1522.35 | 1538.97 | 1501.44 | 1523.87 | 1540.22 | 1505.85 | 1528.00 | 1544.15 |
| 0.00144 | 1497.16 | 1519.99 | | 1536.58 | 1499.84 | 1522.37 | 1539.02 | 1501.48 | 1523.89 | 1540.24 | 1505.87 | 1528.02 | 1544.17 |
| 0.00168 | 1497.23 | 1520.03 | | 1536.60 | 1499.86 | 1522.40 | 1539.07 | 1501.52 | 1523.92 | 1540.27 | 1505.90 | 1528.04 | 1544.19 |
| 0.00193 | 1497.30 | 1520.06 | | 1536.62 | 1499.90 | 1522.43 | 1539.11 | 1501.55 | 1523.95 | 1540.29 | 1505.92 | 1528.07 | 1544.21 |
| 0.00216 | 1497.34 | 1520.09 | | 1536.64 | 1499.93 | 1522.45 | 1539.16 | 1501.57 | 1523.97 | 1540.31 | 1505.94 | 1528.08 | 1544.22 |
| 0.00240 | 1497.38 | 1520.11 | | 1536.66 | 1499.94 | 1522.47 | 1539.19 | 1501.59 | 1523.99 | 1540.32 | 1505.96 | 1528.09 | 1544.23 |
| 0.00288 | 1497.43 | 1520.14 | | 1536.68 | 1499.99 | 1522.50 | 1539.23 | 1501.63 | 1524.03 | 1540.35 | 1505.99 | 1528.12 | 1544.26 |
| 0.00337 | 1497.50 | 1520.17 | | 1536.70 | 1500.03 | 1522.53 | 1539.28 | 1501.67 | 1524.07 | 1540.38 | 1506.03 | 1528.15 | 1544.28 |
| 0.00385 | 1497.56 | 1520.20 | | 1536.72 | 1500.07 | 1522.56 | 1539.32 | 1501.71 | 1524.10 | 1540.41 | 1506.07 | 1528.19 | 1544.30 |
| 0.00433 | 1497.61 | 1520.23 | | 1536.74 | 1500.12 | 1522.59 | 1539.37 | 1501.75 | 1524.14 | 1540.44 | 1506.11 | 1528.22 | 1544.33 |
| 0.00480 | 1497.67 | 1520.26 | | 1536.76 | 1500.16 | 1522.62 | 1539.41 | 1501.79 | 1524.18 | 1540.47 | 1506.14 | 1528.25 | 1544.35 |
|  |  |  | |  |  |  |  |  |  |  |  |  |  |
| *α*PMZ=0.8 | | | | | | | | | | | | | |
|  | *m*B = 0.00 **mol·kg−1** | | | | *m*B = 0.025 **mol·kg−1** GG | | | *m*B = 0.05 **mol·kg−1** GG | | | *m*B = 0.10 **mol·kg−1** GG | | |
| 0.00000 | 1496.78 | 1519.80 | | 1536.46 | 1499.63 | 1522.22 | 1538.74 | 1501.26 | 1523.72 | 1540.12 | 1505.72 | 1527.90 | 1544.05 |
| 0.00045 | 1496.89 | 1519.86 | | 1536.51 | 1499.67 | 1522.25 | 1538.78 | 1501.35 | 1523.79 | 1540.17 | 1505.78 | 1527.95 | 1544.09 |
| 0.00136 | 1497.11 | 1520.00 | | 1536.61 | 1499.77 | 1522.33 | 1538.84 | 1501.52 | 1523.92 | 1540.27 | 1505.91 | 1528.06 | 1544.18 |
| 0.00225 | 1497.35 | 1520.14 | | 1536.72 | 1499.88 | 1522.40 | 1538.90 | 1501.69 | 1524.05 | 1540.37 | 1506.04 | 1528.18 | 1544.28 |
| 0.00270 | 1497.46 | 1520.21 | | 1536.77 | 1499.93 | 1522.44 | 1538.93 | 1501.78 | 1524.12 | 1540.43 | 1506.10 | 1528.23 | 1544.32 |
| 0.00315 | 1497.57 | 1520.28 | | 1536.82 | 1499.97 | 1522.48 | 1538.97 | 1501.86 | 1524.18 | 1540.48 | 1506.16 | 1528.28 | 1544.36 |
| 0.00361 | 1497.69 | 1520.36 | | 1536.88 | 1500.02 | 1522.52 | 1538.99 | 1501.91 | 1524.23 | 1540.54 | 1506.21 | 1528.32 | 1544.40 |
| 0.00405 | 1497.75 | 1520.42 | | 1536.93 | 1500.05 | 1522.53 | 1539.02 | 1501.97 | 1524.28 | 1540.57 | 1506.25 | 1528.35 | 1544.43 |
| 0.00450 | 1497.81 | 1520.46 | | 1536.97 | 1500.09 | 1522.56 | 1539.05 | 1502.03 | 1524.32 | 1540.62 | 1506.30 | 1528.38 | 1544.47 |
| 0.00540 | 1497.91 | 1520.53 | | 1537.03 | 1500.16 | 1522.60 | 1539.09 | 1502.14 | 1524.42 | 1540.70 | 1506.39 | 1528.45 | 1544.53 |
| 0.00631 | 1498.02 | 1520.61 | | 1537.08 | 1500.24 | 1522.65 | 1539.12 | 1502.27 | 1524.52 | 1540.77 | 1506.48 | 1528.52 | 1544.60 |
| 0.00721 | 1498.13 | 1520.69 | | 1537.14 | 1500.32 | 1522.69 | 1539.16 | 1502.38 | 1524.60 | 1540.85 | 1506.57 | 1528.58 | 1544.66 |
| 0.00812 | 1498.24 | 1520.76 | | 1537.19 | 1500.39 | 1522.73 | 1539.20 | 1502.49 | 1524.69 | 1540.93 | 1506.66 | 1528.65 | 1544.73 |
| 0.00901 | 1498.35 | 1520.84 | | 1537.25 | 1500.46 | 1522.78 | 1539.24 | 1502.60 | 1524.79 | 1541.01 | 1506.75 | 1528.72 | 1544.80 |
|  |  |  | |  |  |  |  |  |  |  |  |  |  |
| PMZ | | | | | | | | | | | | | |
|  | *m*B = 0.00 **mol·kg−1** | | | | *m*B = 0.025 **mol·kg−1** GGG | | | *m*B = 0.05 **mol·kg−1** GGG | | | *m*B = 0.10 **mol·kg−1** GGG | | |
| 0.00000 | 1496.78 | 1519.80 | | 1536.46 | 1499.32 | 1521.81 | 1538.25 | 1501.77 | 1524.06 | 1540.37 | 1506.93 | 1528.89 | 1544.95 |
| 0.00352 | 1497.34 | 1520.33 | | 1536.83 | 1499.81 | 1522.29 | 1538.72 | 1502.34 | 1524.53 | 1540.77 | 1507.55 | 1529.44 | 1545.38 |
| 0.01053 | 1498.65 | 1521.30 | | 1537.66 | 1501.08 | 1523.41 | 1539.62 | 1503.58 | 1525.59 | 1541.68 | 1508.75 | 1530.47 | 1546.27 |
| 0.01748 | 1499.84 | 1522.23 | | 1538.57 | 1502.24 | 1524.37 | 1540.51 | 1504.72 | 1526.60 | 1542.64 | 1509.90 | 1531.58 | 1547.19 |
| 0.02097 | 1500.57 | 1522.71 | | 1539.02 | 1502.78 | 1524.95 | 1540.95 | 1505.26 | 1527.14 | 1543.10 | 1510.59 | 1532.04 | 1547.70 |
| 0.02450 | 1501.18 | 1523.29 | | 1539.40 | 1503.43 | 1525.46 | 1541.36 | 1505.82 | 1527.66 | 1543.43 | 1511.00 | 1532.60 | 1547.92 |
| 0.02805 | 1501.70 | 1523.77 | | 1539.81 | 1503.96 | 1525.91 | 1541.66 | 1506.30 | 1528.11 | 1543.82 | 1511.47 | 1533.03 | 1548.32 |
| 0.03148 | 1502.34 | 1524.32 | | 1540.26 | 1504.29 | 1526.28 | 1542.00 | 1506.68 | 1528.38 | 1544.10 | 1511.78 | 1533.39 | 1548.65 |
| 0.03497 | 1502.89 | 1524.79 | | 1540.51 | 1504.59 | 1526.59 | 1542.33 | 1507.06 | 1528.73 | 1544.38 | 1512.18 | 1533.73 | 1548.98 |
| 0.04198 | 1503.50 | 1525.36 | | 1541.24 | 1505.34 | 1527.20 | 1542.94 | 1507.81 | 1529.42 | 1545.05 | 1513.04 | 1534.45 | 1549.69 |
| 0.04896 | 1504.18 | 1525.99 | | 1541.74 | 1506.06 | 1527.87 | 1543.56 | 1508.53 | 1530.13 | 1545.68 | 1513.78 | 1535.07 | 1550.36 |
| 0.05594 | 1504.82 | 1526.69 | | 1542.34 | 1506.81 | 1528.53 | 1544.20 | 1509.25 | 1530.81 | 1546.33 | 1514.56 | 1535.75 | 1551.03 |
| 0.06301 | 1505.41 | 1527.26 | | 1542.98 | 1507.53 | 1529.21 | 1544.81 | 1510.03 | 1531.48 | 1547.01 | 1515.34 | 1536.44 | 1551.70 |
| 0.07000 | 1506.08 | 1527.88 | | 1543.64 | 1508.28 | 1529.85 | 1545.46 | 1510.71 | 1532.10 | 1547.62 | 1516.14 | 1537.15 | 1552.39 |
|  |  |  | |  |  |  |  |  |  |  |  |  |  |
| CTAB | | | | | | | | | | | | | |
|  | *m*B = 0.00 **mol·kg−1** | | | | *m*B = 0.025 **mol·kg−1** GGG | | | *m*B = 0.05 **mol·kg−1** GGG | | | *m*B = 0.10 **mol·kg−1** GGG | | |
| 0.00000 | 1496.78 | 1519.80 | | 1536.46 | 1499.32 | 1521.81 | 1538.25 | 1501.77 | 1524.06 | 1540.37 | 1506.93 | 1528.89 | 1544.95 |
| 0.00010 | 1496.82 | 1519.85 | | 1536.51 | 1499.34 | 1521.82 | 1538.26 | 1501.80 | 1524.09 | 1540.39 | 1506.95 | 1528.91 | 1544.96 |
| 0.00030 | 1496.89 | 1519.93 | | 1536.59 | 1499.37 | 1521.85 | 1538.30 | 1501.87 | 1524.15 | 1540.45 | 1507.00 | 1528.94 | 1544.99 |
| 0.00051 | 1496.96 | 1520.02 | | 1536.70 | 1499.41 | 1521.88 | 1538.33 | 1501.94 | 1524.22 | 1540.51 | 1507.06 | 1528.97 | 1545.02 |
| 0.00060 | 1497.00 | 1520.06 | | 1536.74 | 1499.43 | 1521.89 | 1538.35 | 1501.97 | 1524.25 | 1540.53 | 1507.08 | 1528.99 | 1545.03 |
| 0.00074 | 1497.04 | 1520.12 | | 1536.80 | 1499.45 | 1521.91 | 1538.37 | 1502.02 | 1524.30 | 1540.57 | 1507.11 | 1529.01 | 1545.05 |
| 0.00080 | 1497.06 | 1520.15 | | 1536.83 | 1499.46 | 1521.92 | 1538.38 | 1502.04 | 1524.32 | 1540.59 | 1507.13 | 1529.02 | 1545.06 |
| 0.00090 | 1497.10 | 1520.19 | | 1536.88 | 1499.48 | 1521.93 | 1538.40 | 1502.06 | 1524.35 | 1540.62 | 1507.15 | 1529.03 | 1545.07 |
| 0.00101 | 1497.14 | 1520.24 | | 1536.93 | 1499.49 | 1521.95 | 1538.41 | 1502.09 | 1524.37 | 1540.64 | 1507.16 | 1529.04 | 1545.08 |
| 0.00120 | 1497.17 | 1520.30 | | 1537.02 | 1499.51 | 1521.96 | 1538.43 | 1502.13 | 1524.41 | 1540.68 | 1507.19 | 1529.05 | 1545.09 |
| 0.00141 | 1497.20 | 1520.34 | | 1537.07 | 1499.53 | 1521.97 | 1538.45 | 1502.17 | 1524.45 | 1540.71 | 1507.21 | 1529.07 | 1545.10 |
| 0.00160 | 1497.23 | 1520.38 | | 1537.11 | 1499.55 | 1521.98 | 1538.47 | 1502.22 | 1524.48 | 1540.73 | 1507.24 | 1529.09 | 1545.12 |
| 0.00181 | 1497.27 | 1520.43 | | 1537.16 | 1499.58 | 1522.00 | 1538.48 | 1502.26 | 1524.52 | 1540.76 | 1507.26 | 1529.10 | 1545.13 |
| 0.00200 | 1497.30 | 1520.47 | | 1537.20 | 1499.60 | 1522.01 | 1538.50 | 1502.30 | 1524.55 | 1540.78 | 1507.29 | 1529.12 | 1545.14 |
|  |  |  | |  |  |  |  |  |  |  |  |  |  |
| *α*PMZ=0.2 | | | | | | | | | | | | | |
|  | *m*B = 0.00 **mol·kg−1** | | | | *m*B = 0.025 **mol·kg−1** GGG | | | *m*B = 0.05 **mol·kg−1** GGG | | | *m*B = 0.10 **mol·kg−1** GGG | | |
| 0.00000 | 1496.78 | 1519.80 | | 1536.46 | 1499.32 | 1521.81 | 1538.25 | 1501.77 | 1524.06 | 1540.37 | 1506.93 | 1528.89 | 1544.95 |
| 0.00012 | 1496.85 | 1519.83 | | 1536.48 | 1499.35 | 1521.84 | 1538.27 | 1501.80 | 1524.09 | 1540.40 | 1506.95 | 1528.91 | 1544.97 |
| 0.00037 | 1496.99 | 1519.89 | | 1536.53 | 1499.41 | 1521.89 | 1538.31 | 1501.86 | 1524.16 | 1540.47 | 1506.99 | 1528.95 | 1545.02 |
| 0.00062 | 1497.13 | 1519.94 | | 1536.58 | 1499.47 | 1521.94 | 1538.35 | 1501.93 | 1524.23 | 1540.53 | 1507.03 | 1528.99 | 1545.06 |
| 0.00074 | 1497.20 | 1519.97 | | 1536.60 | 1499.50 | 1521.96 | 1538.37 | 1501.96 | 1524.26 | 1540.57 | 1507.05 | 1529.02 | 1545.08 |
| 0.00087 | 1497.28 | 1520.00 | | 1536.63 | 1499.53 | 1521.99 | 1538.39 | 1501.99 | 1524.29 | 1540.60 | 1507.06 | 1529.04 | 1545.10 |
| 0.00100 | 1497.35 | 1520.03 | | 1536.65 | 1499.56 | 1522.01 | 1538.41 | 1502.03 | 1524.33 | 1540.64 | 1507.08 | 1529.06 | 1545.13 |
| 0.00112 | 1497.41 | 1520.06 | | 1536.68 | 1499.58 | 1522.04 | 1538.43 | 1502.05 | 1524.36 | 1540.66 | 1507.10 | 1529.07 | 1545.15 |
| 0.00124 | 1497.45 | 1520.09 | | 1536.70 | 1499.60 | 1522.05 | 1538.45 | 1502.07 | 1524.37 | 1540.68 | 1507.11 | 1529.08 | 1545.16 |
| 0.00149 | 1497.49 | 1520.11 | | 1536.74 | 1499.64 | 1522.08 | 1538.48 | 1502.11 | 1524.41 | 1540.72 | 1507.13 | 1529.10 | 1545.18 |
| 0.00175 | 1497.54 | 1520.14 | | 1536.76 | 1499.68 | 1522.10 | 1538.50 | 1502.16 | 1524.44 | 1540.75 | 1507.15 | 1529.12 | 1545.21 |
| 0.00200 | 1497.57 | 1520.17 | | 1536.78 | 1499.72 | 1522.13 | 1538.53 | 1502.19 | 1524.47 | 1540.78 | 1507.18 | 1529.15 | 1545.23 |
| 0.00225 | 1497.61 | 1520.19 | | 1536.80 | 1499.76 | 1522.16 | 1538.56 | 1502.23 | 1524.51 | 1540.81 | 1507.20 | 1529.17 | 1545.26 |
| 0.00248 | 1497.65 | 1520.22 | | 1536.82 | 1499.80 | 1522.18 | 1538.58 | 1502.27 | 1524.54 | 1540.85 | 1507.22 | 1529.19 | 1545.28 |
|  |  |  | |  |  |  |  |  |  |  |  |  |  |
| *α*PMZ=0.4 | | | | | | | | | | | | | |
|  | *m*B = 0.00 **mol·kg−1** | | | | *m*B = 0.025 **mol·kg−1** GGG | | | *m*B = 0.05 **mol·kg−1** GGG | | | *m*B = 0.10 **mol·kg−1** GGG | | |
| 0.00000 | 1496.78 | 1519.80 | | 1536.46 | 1499.32 | 1521.81 | 1538.25 | 1501.77 | 1524.06 | 1540.37 | 1506.93 | 1528.89 | 1544.95 |
| 0.00016 | 1496.84 | 1519.82 | | 1536.47 | 1499.35 | 1521.84 | 1538.28 | 1501.81 | 1524.09 | 1540.40 | 1506.97 | 1528.91 | 1544.97 |
| 0.00049 | 1496.97 | 1519.87 | | 1536.50 | 1499.42 | 1521.90 | 1538.33 | 1501.89 | 1524.16 | 1540.47 | 1507.05 | 1528.97 | 1545.02 |
| 0.00082 | 1497.11 | 1519.93 | | 1536.54 | 1499.48 | 1521.97 | 1538.38 | 1501.97 | 1524.23 | 1540.53 | 1507.13 | 1529.02 | 1545.07 |
| 0.00098 | 1497.18 | 1519.95 | | 1536.55 | 1499.51 | 1522.00 | 1538.41 | 1502.01 | 1524.27 | 1540.56 | 1507.17 | 1529.05 | 1545.09 |
| 0.00115 | 1497.25 | 1519.98 | | 1536.57 | 1499.54 | 1522.03 | 1538.43 | 1502.05 | 1524.30 | 1540.59 | 1507.21 | 1529.07 | 1545.12 |
| 0.00132 | 1497.31 | 1520.01 | | 1536.58 | 1499.58 | 1522.06 | 1538.46 | 1502.09 | 1524.34 | 1540.62 | 1507.24 | 1529.10 | 1545.14 |
| 0.00147 | 1497.38 | 1520.03 | | 1536.60 | 1499.60 | 1522.09 | 1538.49 | 1502.11 | 1524.36 | 1540.65 | 1507.26 | 1529.12 | 1545.16 |
| 0.00164 | 1497.42 | 1520.06 | | 1536.61 | 1499.62 | 1522.11 | 1538.50 | 1502.13 | 1524.38 | 1540.66 | 1507.28 | 1529.14 | 1545.17 |
| 0.00197 | 1497.48 | 1520.08 | | 1536.63 | 1499.65 | 1522.14 | 1538.54 | 1502.18 | 1524.41 | 1540.69 | 1507.33 | 1529.17 | 1545.20 |
| 0.00230 | 1497.54 | 1520.10 | | 1536.65 | 1499.69 | 1522.18 | 1538.57 | 1502.22 | 1524.45 | 1540.72 | 1507.37 | 1529.20 | 1545.23 |
| 0.00263 | 1497.59 | 1520.12 | | 1536.66 | 1499.72 | 1522.21 | 1538.60 | 1502.26 | 1524.48 | 1540.75 | 1507.42 | 1529.23 | 1545.26 |
| 0.00296 | 1497.65 | 1520.14 | | 1536.68 | 1499.76 | 1522.24 | 1538.63 | 1502.30 | 1524.52 | 1540.77 | 1507.46 | 1529.26 | 1545.28 |
| 0.00328 | 1497.71 | 1520.16 | | 1536.69 | 1499.79 | 1522.27 | 1538.66 | 1502.35 | 1524.55 | 1540.80 | 1507.50 | 1529.29 | 1545.31 |
|  |  |  | |  |  |  |  |  |  |  |  |  |  |
| *α*PMZ=0.6 | | | | | | | | | | | | | |
|  | *m*B = 0.00 **mol·kg−1** | | | | *m*B = 0.025 **mol·kg−1** GGG | | | *m*B = 0.05 **mol·kg−1** GGG | | | *m*B = 0.10 **mol·kg−1** GGG | | |
| 0.00000 | 1496.78 | 1519.80 | | 1536.46 | 1499.32 | 1521.81 | 1538.25 | 1501.77 | 1524.06 | 1540.37 | 1506.93 | 1528.89 | 1544.95 |
| 0.00024 | 1496.84 | 1519.83 | | 1536.48 | 1499.37 | 1521.85 | 1538.29 | 1501.84 | 1524.12 | 1540.41 | 1506.99 | 1528.93 | 1544.98 |
| 0.00072 | 1496.97 | 1519.89 | | 1536.52 | 1499.48 | 1521.93 | 1538.36 | 1501.98 | 1524.24 | 1540.50 | 1507.11 | 1529.01 | 1545.06 |
| 0.00120 | 1497.10 | 1519.96 | | 1536.56 | 1499.59 | 1522.01 | 1538.43 | 1502.12 | 1524.35 | 1540.60 | 1507.22 | 1529.09 | 1545.13 |
| 0.00144 | 1497.16 | 1519.99 | | 1536.58 | 1499.64 | 1522.05 | 1538.46 | 1502.18 | 1524.41 | 1540.64 | 1507.28 | 1529.13 | 1545.17 |
| 0.00168 | 1497.23 | 1520.03 | | 1536.60 | 1499.69 | 1522.09 | 1538.50 | 1502.26 | 1524.47 | 1540.69 | 1507.34 | 1529.17 | 1545.21 |
| 0.00193 | 1497.30 | 1520.06 | | 1536.62 | 1499.75 | 1522.13 | 1538.53 | 1502.30 | 1524.52 | 1540.73 | 1507.37 | 1529.21 | 1545.24 |
| 0.00216 | 1497.34 | 1520.09 | | 1536.64 | 1499.78 | 1522.16 | 1538.56 | 1502.33 | 1524.55 | 1540.77 | 1507.40 | 1529.23 | 1545.27 |
| 0.00240 | 1497.38 | 1520.11 | | 1536.66 | 1499.81 | 1522.19 | 1538.58 | 1502.36 | 1524.58 | 1540.79 | 1507.42 | 1529.25 | 1545.30 |
| 0.00288 | 1497.43 | 1520.14 | | 1536.68 | 1499.87 | 1522.24 | 1538.62 | 1502.43 | 1524.64 | 1540.85 | 1507.48 | 1529.30 | 1545.34 |
| 0.00337 | 1497.50 | 1520.17 | | 1536.70 | 1499.93 | 1522.29 | 1538.66 | 1502.49 | 1524.70 | 1540.90 | 1507.54 | 1529.35 | 1545.39 |
| 0.00385 | 1497.56 | 1520.20 | | 1536.72 | 1499.99 | 1522.34 | 1538.70 | 1502.55 | 1524.75 | 1540.96 | 1507.59 | 1529.39 | 1545.44 |
| 0.00433 | 1497.61 | 1520.23 | | 1536.74 | 1500.05 | 1522.39 | 1538.74 | 1502.62 | 1524.81 | 1541.01 | 1507.65 | 1529.44 | 1545.49 |
| 0.00480 | 1497.67 | 1520.26 | | 1536.76 | 1500.11 | 1522.44 | 1538.78 | 1502.68 | 1524.86 | 1541.06 | 1507.71 | 1529.49 | 1545.54 |
|  |  |  | |  |  |  |  |  |  |  |  |  |  |
| *α*PMZ=0.8 | | | | | | | | | | | | | |
|  | *m*B = 0.00 **mol·kg−1** | | | | *m*B = 0.025 **mol·kg−1** GGG | | | *m*B = 0.05 **mol·kg−1** GGG | | | *m*B = 0.10 **mol·kg−1** GGG | | |
| 0.00000 | 1496.78 | 1519.80 | | 1536.46 | 1499.32 | 1521.81 | 1538.25 | 1501.77 | 1524.06 | 1540.37 | 1506.93 | 1528.89 | 1544.95 |
| 0.00045 | 1496.89 | 1519.86 | | 1536.51 | 1499.42 | 1521.87 | 1538.31 | 1501.87 | 1524.14 | 1540.44 | 1507.02 | 1528.95 | 1545.01 |
| 0.00136 | 1497.11 | 1520.00 | | 1536.61 | 1499.60 | 1522.01 | 1538.43 | 1502.06 | 1524.31 | 1540.58 | 1507.19 | 1529.09 | 1545.12 |
| 0.00225 | 1497.35 | 1520.14 | | 1536.72 | 1499.80 | 1522.15 | 1538.55 | 1502.26 | 1524.47 | 1540.72 | 1507.38 | 1529.22 | 1545.25 |
| 0.00270 | 1497.46 | 1520.21 | | 1536.77 | 1499.89 | 1522.22 | 1538.61 | 1502.37 | 1524.56 | 1540.79 | 1507.46 | 1529.28 | 1545.31 |
| 0.00315 | 1497.57 | 1520.28 | | 1536.82 | 1499.98 | 1522.30 | 1538.68 | 1502.43 | 1524.64 | 1540.88 | 1507.50 | 1529.34 | 1545.36 |
| 0.00361 | 1497.69 | 1520.36 | | 1536.88 | 1500.02 | 1522.37 | 1538.74 | 1502.49 | 1524.68 | 1540.92 | 1507.55 | 1529.38 | 1545.39 |
| 0.00405 | 1497.75 | 1520.42 | | 1536.93 | 1500.07 | 1522.41 | 1538.80 | 1502.55 | 1524.72 | 1540.95 | 1507.60 | 1529.42 | 1545.42 |
| 0.00450 | 1497.81 | 1520.46 | | 1536.97 | 1500.12 | 1522.44 | 1538.82 | 1502.60 | 1524.76 | 1540.99 | 1507.64 | 1529.46 | 1545.45 |
| 0.00540 | 1497.91 | 1520.53 | | 1537.03 | 1500.22 | 1522.52 | 1538.88 | 1502.71 | 1524.85 | 1541.06 | 1507.73 | 1529.54 | 1545.51 |
| 0.00631 | 1498.02 | 1520.61 | | 1537.08 | 1500.33 | 1522.60 | 1538.93 | 1502.82 | 1524.95 | 1541.13 | 1507.82 | 1529.62 | 1545.57 |
| 0.00721 | 1498.13 | 1520.69 | | 1537.14 | 1500.42 | 1522.68 | 1538.98 | 1502.94 | 1525.04 | 1541.21 | 1507.91 | 1529.70 | 1545.63 |
| 0.00812 | 1498.24 | 1520.76 | | 1537.19 | 1500.51 | 1522.76 | 1539.03 | 1503.05 | 1525.13 | 1541.29 | 1508.01 | 1529.78 | 1545.69 |
| 0.00901 | 1498.35 | 1520.84 | | 1537.25 | 1500.60 | 1522.84 | 1539.08 | 1503.16 | 1525.22 | 1541.35 | 1508.10 | 1529.86 | 1545.74 |

*m*A, molality of mixed (PMZ + CTAB) system.

*m*B, molalities of glycine, glycylglycine and glycylglycylglycine.

**Standard uncertainties: u(*T*) = 0.20 K, u(*m*) = 0.04 mol·kg−1, u(*α*) = 0.26, u(*u*) = 0.29 m·s-1 (0.95 level of confidence).**

**Table S6**

Experimental *CMC* and *CMC*ideal values of PMZ and CTAB, and their mixtures at various mole fractions in glycine(aq), glycylglycine(aq) and glycylglycylglycine(aq) solutions, obtained from the conductivity, and density and sound velocity data at *T* = (298.15, 308.15 and 318.15) K.

|  |  | ***CMC***  **(10-3 / mol·kg-1)** |  |  |
| --- | --- | --- | --- | --- |
| *T* (K) | From conductivity | From  density | From  sound velocity | *CMC*ideal |
| PMZ | | | | |
| *m*B = 0.00 **mol·kg−1** | | | | |
| 298.15 | 34.83 | 34.89 | 34.67 | - |
| 308.15 | 35.67 | 36.44 | 35.78 | - |
| 318.15 | 32.33 | 32.44 | 32.44 | - |
| *m*B = 0.025 **mol·kg−1** G | | | | |
| 298.15 | 30.83 | 30.92 | 30.92 | - |
| 308.15 | 32.50 | 32.67 | 32.67 | - |
| 318.15 | 29.00 | 28.97 | 29.17 | - |
| *m*B = 0.05 **mol·kg−1** G | | | | |
| 298.15 | 29.67 | 30.14 | 29.75 | - |
| 308.15 | 31.17 | 30.92 | 30.92 | - |
| 318.15 | 27.50 | 28.00 | 27.81 | - |
| *m*B = 0.10 **mol·kg−1** G | | | | |
| 298.15 | 28.50 | 28.58 | 29.17 | - |
| 308.15 | 29.83 | 29.75 | 29.94 | - |
| 318.15 | 26.83 | 26.64 | 27.03 | - |
| *m*B = 0.025 **mol·kg−1** GG | | | | |
| 298.15 | 29.33 | 29.78 | 29.78 | - |
| 308.15 | 31.83 | 31.78 | 30.67 | - |
| 318.15 | 27.00 | 26.67 | 27.78 | - |
| *m*B = 0.05 **mol·kg−1** GG | | | | |
| 298.15 | 28.83 | 28.44 | 28.44 | - |
| 308.15 | 30.67 | 30.67 | 30.44 | - |
| 318.15 | 26.17 | 26.00 | 26.22 | - |
| *m*B = 0.10 **mol·kg−1** GG | | | | |
| 298.15 | 27.33 | 27.56 | 27.56 | - |
| 308.15 | 29.33 | 29.56 | 29.56 | - |
| 318.15 | 25.17 | 25.33 | 25.78 | - |
| *m*B = 0.025 **mol·kg−1** GGG | | | | |
| 298.15 | 26.83 | 26.83 | 26.64 | - |
| 308.15 | 27.33 | 27.42 | 27.61 | - |
| 318.15 | 22.17 | 22.94 | 22.17 | - |
| *m*B = 0.05 **mol·kg−1** GGG | | | | |
| 298.15 | 25.33 | 25.47 | 25.67 | - |
| 308.15 | 26.50 | 26.25 | 26.83 | - |
| 318.15 | 21.67 | 22.17 | 22.36 | - |
| *m*B = 0.10 **mol·kg−1**GGG | | | | |
| 298.15 | 22.67 | 22.56 | 22.17 | - |
| 308.15 | 25.33 | 25.28 | 25.47 | - |
| 318.15 | 19.83 | 19.83 | 20.03 | - |
| CTAB | | | | |
| *m*B = 0.00 **mol·kg−1** | | | | |
| 298.15 | 0.97 | 0.97 | 0.95 | - |
| 308.15 | 1.08 | 1.08 | 1.07 | - |
| 318.15 | 1.22 | 1.20 | 1.23 | - |
| *m*B = 0.025 **mol·kg−1** G | | | | |
| 298.15 | 0.91 | 0.90 | 0.91 | - |
| 308.15 | 1.01 | 1.00 | 1.02 | - |
| 318.15 | 1.11 | 1.10 | 1.10 | - |
| *m*B = 0.05 **mol·kg−1** G | | | | |
| 298.15 | 0.89 | 0.88 | 0.89 | - |
| 308.15 | 0.99 | 0.98 | 0.99 | - |
| 318.15 | 1.09 | 1.08 | 1.08 | - |
| *m*B = 0.10 **mol·kg−1** G | | | | |
| 298.15 | 0.85 | 0.86 | 0.84 | - |
| 308.15 | 0.93 | 0.93 | 0.94 | - |
| 318.15 | 1.04 | 1.04 | 1.04 | - |
| *m*B = 0.025 **mol·kg−1** GG | | | | |
| 298.15 | 0.89 | 0.89 | 0.88 | - |
| 308.15 | 0.98 | 0.97 | 0.98 | - |
| 318.15 | 1.09 | 1.08 | 1.08 | - |
| *m*B = 0.05 **mol·kg−1** GG | | | | |
| 298.15 | 0.86 | 0.86 | 0.88 | - |
| 308.15 | 0.95 | 0.96 | 0.97 | - |
| 318.15 | 1.07 | 1.06 | 1.06 | - |
| *m*B = 0.10 **mol·kg−1** GG | | | | |
| 298.15 | 0.83 | 0.84 | 0.84 | - |
| 308.15 | 0.89 | 0.92 | 0.89 | - |
| 318.15 | 0.97 | 0.99 | 0.97 | - |
| *m*B = 0.025 **mol·kg−1** GGG | | | | |
| 298.15 | 0.88 | 0.87 | 0.88 | - |
| 308.15 | 0.97 | 0.95 | 0.96 | - |
| 318.15 | 1.06 | 1.06 | 1.06 | - |
| *m*B = 0.05 **mol·kg−1** GGG | | | | |
| 298.15 | 0.85 | 0.85 | 0.84 | - |
| 308.15 | 0.94 | 0.95 | 0.94 | - |
| 318.15 | 1.05 | 1.06 | 1.06 | - |
| *m*B = 0.10 **mol·kg−1** GGG | | | | |
| 298.15 | 0.82 | 0.83 | 0.83 | - |
| 308.15 | 0.87 | 0.88 | 0.86 | - |
| 318.15 | 0.92 | 0.92 | 0.93 | - |
| *α*PMZ = 0.2 | | | | |
| *m*B = 0.00 mol kg-1 | | | | |
| 298.15 | 1.14 | 1.15 | 1.15 | 1.21 |
| 308.15 | 1.24 | 1.23 | 1.22 | 1.34 |
| 318.15 | 1.35 | 1.34 | 1.38 | 1.51 |
| *m*B = 0.025 **mol·kg−1** G | | | | |
| 298.15 | 1.10 | 1.09 | 1.11 | 1.12 |
| 308.15 | 1.22 | 1.20 | 1.23 | 1.25 |
| 318.15 | 1.33 | 1.31 | 1.33 | 1.37 |
| *m*B = 0.05 **mol·kg−1**G | | | | |
| 298.15 | 1.09 | 1.07 | 1.08 | 1.10 |
| 308.15 | 1.18 | 1.19 | 1.17 | 1.23 |
| 318.15 | 1.26 | 1.27 | 1.26 | 1.35 |
| *m*B = 0.10 **mol·kg−1**G | | | | |
| 298.15 | 1.04 | 1.03 | 1.03 | 1.05 |
| 308.15 | 1.15 | 1.15 | 1.14 | 1.16 |
| 318.15 | 1.24 | 1.25 | 1.24 | 1.29 |
| *m*B = 0.025 **mol·kg−1** GG | | | | |
| 298.15 | 1.07 | 1.08 | 1.06 | 1.10 |
| 308.15 | 1.16 | 1.17 | 1.16 | 1.21 |
| 318.15 | 1.24 | 1.24 | 1.23 | 1.35 |
| *m*B = 0.05 **mol·kg−1** GG | | | | |
| 298.15 | 1.06 | 1.06 | 1.05 | 1.07 |
| 308.15 | 1.10 | 1.11 | 1.13 | 1.18 |
| 318.15 | 1.15 | 1.16 | 1.14 | 1.32 |
| *m*B = 0.10 **mol·kg−1** GG | | | | |
| 298.15 | 1.02 | 1.00 | 1.02 | 1.03 |
| 308.15 | 1.06 | 1.06 | 1.07 | 1.11 |
| 318.15 | 1.09 | 1.09 | 1.08 | 1.20 |
| *m*B = 0.025 **mol·kg−1** GGG | | | | |
| 298.15 | 1.06 | 1.06 | 1.06 | 1.09 |
| 308.15 | 1.14 | 1.15 | 1.15 | 1.20 |
| 318.15 | 1.23 | 1.22 | 1.24 | 1.31 |
| *m*B = 0.05 **mol·kg−1**GGG | | | | |
| 298.15 | 1.04 | 1.04 | 1.03 | 1.05 |
| 308.15 | 1.08 | 1.08 | 1.07 | 1.17 |
| 318.15 | 1.13 | 1.13 | 1.13 | 1.30 |
| *m*B = 0.10 **mol·kg−1** GGG | | | | |
| 298.15 | 1.01 | 1.01 | 1.01 | 1.02 |
| 308.15 | 1.04 | 1.04 | 1.04 | 1.08 |
| 318.15 | 1.08 | 1.08 | 1.07 | 1.14 |
| *α*PMZ = 0.4 | | | | |
| *m*B = 0.00 **mol·kg−1** | | | | |
| 298.15 | 1.53 | 1.54 | 1.55 | 1.59 |
| 308.15 | 1.61 | 1.65 | 1.62 | 1.76 |
| 318.15 | 1.70 | 1.73 | 1.74 | 1.99 |
| *m*B = 0.025 **mol·kg−1** G | | | | |
| 298.15 | 1.47 | 1.46 | 1.45 | 1.48 |
| 308.15 | 1.58 | 1.58 | 1.58 | 1.64 |
| 318.15 | 1.69 | 1.69 | 1.69 | 1.80 |
| *m*B = 0.05 **mol·kg−1**G | | | | |
| 298.15 | 1.43 | 1.43 | 1.42 | 1.45 |
| 308.15 | 1.53 | 1.54 | 1.53 | 1.61 |
| 318.15 | 1.63 | 1.64 | 1.63 | 1.78 |
| *m*B = 0.10 **mol·kg−1**G | | | | |
| 298.15 | 1.35 | 1.34 | 1.36 | 1.39 |
| 308.15 | 1.46 | 1.46 | 1.46 | 1.52 |
| 318.15 | 1.58 | 1.58 | 1.58 | 1.69 |
| *m*B = 0.025 **mol·kg−1**GG | | | | |
| 298.15 | 1.43 | 1.43 | 1.42 | 1.45 |
| 308.15 | 1.50 | 1.50 | 1.49 | 1.60 |
| 318.15 | 1.57 | 1.61 | 1.58 | 1.78 |
| *m*B = 0.05 **mol·kg−1** GG | | | | |
| 298.15 | 1.32 | 1.31 | 1.33 | 1.41 |
| 308.15 | 1.43 | 1.36 | 1.35 | 1.55 |
| 318.15 | 1.55 | 1.43 | 1.42 | 1.73 |
| *m*B = 0.10 **mol·kg−1**GG | | | | |
| 298.15 | 1.30 | 1.25 | 1.24 | 1.36 |
| 308.15 | 1.41 | 1.33 | 1.31 | 1.46 |
| 318.15 | 1.52 | 1.39 | 1.39 | 1.58 |
| *m*B = 0.025 **mol·kg−1** GGG | | | | |
| 298.15 | 1.35 | 1.36 | 1.35 | 1.43 |
| 308.15 | 1.43 | 1.43 | 1.44 | 1.57 |
| 318.15 | 1.52 | 1.52 | 1.52 | 1.71 |
| *m*B = 0.05 **mol·kg−1** GGG | | | | |
| 298.15 | 1.31 | 1.30 | 1.31 | 1.39 |
| 308.15 | 1.35 | 1.36 | 1.35 | 1.54 |
| 318.15 | 1.39 | 1.39 | 1.39 | 1.70 |
| *m*B = 0.10 **mol·kg−1**GGG | | | | |
| 298.15 | 1.23 | 1.23 | 1.23 | 1.34 |
| 308.15 | 1.30 | 1.31 | 1.30 | 1.42 |
| 318.15 | 1.37 | 1.37 | 1.37 | 1.49 |
| *α*PMZ = 0.6 | | | | |
| *m*B = 0.00 **mol·kg−1** | | | | |
| 298.15 | 2.06 | 2.07 | 2.07 | 2.33 |
| 308.15 | 2.30 | 2.19 | 2.18 | 2.58 |
| 318.15 | 2.56 | 2.36 | 2.39 | 2.89 |
| *m*B = 0.025 **mol·kg−1** G | | | | |
| 298.15 | 1.98 | 1.99 | 1.99 | 2.17 |
| 308.15 | 2.13 | 2.14 | 2.13 | 2.40 |
| 318.15 | 2.31 | 2.32 | 2.32 | 2.61 |
| *m*B = 0.05 **mol·kg−1** G | | | | |
| 298.15 | 1.83 | 1.82 | 1.83 | 2.13 |
| 308.15 | 2.00 | 2.01 | 2.03 | 2.36 |
| 318.15 | 2.20 | 2.19 | 2.19 | 2.58 |
| *m*B = 0.10 **mol·kg−1**G | | | | |
| 298.15 | 1.82 | 1.82 | 1.81 | 2.03 |
| 308.15 | 1.99 | 1.99 | 1.97 | 2.23 |
| 318.15 | 2.14 | 2.14 | 2.13 | 2.45 |
| *m*B = 0.025 **mol·kg−1** GG | | | | |
| 298.15 | 1.92 | 1.94 | 1.96 | 2.13 |
| 308.15 | 2.08 | 2.08 | 2.13 | 2.34 |
| 318.15 | 2.23 | 2.22 | 2.22 | 2.58 |
| *m*B = 0.05 **mol·kg−1**GG | | | | |
| 298.15 | 1.81 | 1.82 | 1.83 | 2.06 |
| 308.15 | 1.93 | 1.92 | 1.93 | 2.27 |
| 318.15 | 2.08 | 2.07 | 2.07 | 2.51 |
| *m*B = 0.10 **mol·kg−1** GG | | | | |
| 298.15 | 1.78 | 1.76 | 1.78 | 1.99 |
| 308.15 | 1.89 | 1.89 | 1.86 | 2.14 |
| 318.15 | 2.01 | 2.00 | 1.97 | 2.30 |
| *m*B = 0.025 **mol·kg−1** GGG | | | | |
| 298.15 | 1.89 | 1.89 | 1.89 | 2.09 |
| 308.15 | 2.00 | 1.99 | 2.01 | 2.29 |
| 318.15 | 2.12 | 2.13 | 2.10 | 2.48 |
| *m*B = 0.05 **mol·kg−1** GGG | | | | |
| 298.15 | 1.79 | 1.78 | 1.78 | 2.02 |
| 308.15 | 1.91 | 1.92 | 1.92 | 2.24 |
| 318.15 | 2.06 | 2.07 | 2.06 | 2.45 |
| *m*B = 0.10 **mol·kg−1** GGG | | | | |
| 298.15 | 1.66 | 1.67 | 1.65 | 1.95 |
| 308.15 | 1.79 | 1.78 | 1.79 | 2.07 |
| 318.15 | 1.94 | 1.94 | 1.94 | 2.16 |
| *α*PMZ = 0.8 | | | | |
| *m*B = 0.00 **mol·kg−1** | | | | |
| 298.15 | 3.58 | 3.81 | 3.69 | 4.37 |
| 308.15 | 4.00 | 4.06 | 4.06 | 4.82 |
| 318.15 | 4.44 | 4.44 | 4.42 | 5.31 |
| *m*B = 0.025 **mol·kg−1** G | | | | |
| 298.15 | 3.44 | 3.44 | 3.44 | 4.05 |
| 308.15 | 3.78 | 3.78 | 3.81 | 4.47 |
| 318.15 | 4.18 | 4.19 | 4.17 | 4.80 |
| *m*B = 0.05 **mol·kg−1**G | | | | |
| 298.15 | 3.27 | 3.28 | 3.28 | 3.97 |
| 308.15 | 3.64 | 3.67 | 3.67 | 4.39 |
| 318.15 | 4.09 | 4.08 | 4.08 | 4.72 |
| *m*B = 0.10 **mol·kg−1** G | | | | |
| 298.15 | 3.11 | 3.14 | 3.14 | 3.80 |
| 308.15 | 3.44 | 3.44 | 3.50 | 4.15 |
| 318.15 | 3.80 | 3.81 | 3.81 | 4.50 |
| *m*B = 0.025 **mol·kg−1** GG | | | | |
| 298.15 | 3.38 | 3.42 | 3.39 | 3.96 |
| 308.15 | 3.69 | 3.72 | 3.61 | 4.35 |
| 318.15 | 4.07 | 4.14 | 4.03 | 4.71 |
| *m*B = 0.05 **mol·kg−1**GG | | | | |
| 298.15 | 3.02 | 3.03 | 3.06 | 3.85 |
| 308.15 | 3.40 | 3.44 | 3.39 | 4.23 |
| 318.15 | 3.80 | 3.75 | 3.81 | 4.59 |
| *m*B = 0.10 **mol·kg−1**GG | | | | |
| 298.15 | 2.93 | 2.94 | 2.89 | 3.71 |
| 308.15 | 3.07 | 3.06 | 3.08 | 3.99 |
| 318.15 | 3.22 | 3.25 | 3.19 | 4.21 |
| *m*B = 0.025 **mol·kg−1** GGG | | | | |
| 298.15 | 3.00 | 3.00 | 3.03 | 3.88 |
| 308.15 | 3.44 | 3.50 | 3.50 | 4.23 |
| 318.15 | 4.00 | 4.08 | 4.00 | 4.45 |
| *m*B = 0.05 **mol·kg−1** GGG | | | | |
| 298.15 | 2.71 | 2.72 | 2.72 | 3.75 |
| 308.15 | 2.98 | 2.97 | 2.97 | 4.13 |
| 318.15 | 3.29 | 3.28 | 3.28 | 4.40 |
| *m*B = 0.10 **mol·kg−1**GGG | | | | |
| 298.15 | 2.67 | 2.67 | 2.67 | 3.59 |
| 308.15 | 2.89 | 2.89 | 2.89 | 3.83 |
| 318.15 | 3.11 | 3.22 | 3.06 | 3.89 |

***m*B, molalities of glycine, glycylglycine and glycylglycylglycine.**

**Standard uncertainties: u(*T*) = 0.20 K, u(*m*) = 0.04 mol·kg-1, u(*α*) = 0.26, u(*CMC / CMC*ideal) = 0.02 × 10-3 (mol·kg-1) (0.95 level of confidence).**

**Table S7**

Isentropic compressibility (*κ*s), partial specific volumes (*φ*v), and partial specific isentropic compression (*φ*κ) at various mole fractions of (PMZ + CTAB) mixed system in glycine(aq), glycylglycine(aq)  and glycylglycylglycine(aq) solutions at different temperatures.

| *m*B = 0.025 **mol·kg−1** G | | | | | | | | | |
| --- | --- | --- | --- | --- | --- | --- | --- | --- | --- |
| *α*PMZ = 0.2 | | | | | | | | | |
|  | *κ*s·107  (**m·s2 ·kg−1**) | | | *φ*v ·103  (**m3·mol-1**) | | | *φκ*  (**m·s2·kg−1**) | | |
| *m*A  (mol·kg−1) | *T*(K)=298.15 | 308.15 | 318.15 | 298.15 | 308.15 | 318.15 | 298.15 | 308.15 | 318.15 |
| 0.00000 | 4.469857 | 4.351374 | 4.274879 | 1.002141 | 1.005183 | 1.009070 | 3.467716 | 3.346191 | 3.265809 |
| 0.00012 | 4.469664 | 4.351246 | 4.274810 | 1.002020 | 1.005062 | 1.008948 | 3.466113 | 3.345139 | 3.265288 |
| 0.00037 | 4.469275 | 4.351048 | 4.274617 | 1.001740 | 1.004821 | 1.008706 | 3.462907 | 3.343560 | 3.263726 |
| 0.00062 | 4.468945 | 4.350850 | 4.274424 | 1.001459 | 1.004580 | 1.008464 | 3.460236 | 3.341980 | 3.262164 |
| 0.00074 | 4.468752 | 4.350723 | 4.274356 | 1.001339 | 1.004459 | 1.008343 | 3.458633 | 3.340928 | 3.261644 |
| 0.00087 | 4.468555 | 4.350595 | 4.274232 | 1.001179 | 1.004338 | 1.008222 | 3.457030 | 3.339875 | 3.260602 |
| 0.00100 | 4.468363 | 4.350525 | 4.274163 | 1.001058 | 1.004218 | 1.008101 | 3.455428 | 3.339349 | 3.260081 |
| 0.00112 | 4.468170 | 4.350397 | 4.274039 | 1.000938 | 1.004097 | 1.007980 | 3.453825 | 3.338296 | 3.259040 |
| 0.00124 | 4.468102 | 4.350270 | 4.273970 | 1.000858 | 1.003977 | 1.007859 | 3.453290 | 3.337243 | 3.258519 |
| 0.00149 | 4.467909 | 4.350199 | 4.273842 | 1.000738 | 1.003856 | 1.007697 | 3.451688 | 3.336717 | 3.257478 |
| 0.00175 | 4.467777 | 4.350067 | 4.273769 | 1.000617 | 1.003695 | 1.007536 | 3.450619 | 3.335664 | 3.256957 |
| 0.00200 | 4.467580 | 4.349997 | 4.273700 | 1.000457 | 1.003574 | 1.007415 | 3.449016 | 3.335138 | 3.256437 |
| 0.00225 | 4.467447 | 4.349865 | 4.273628 | 1.000337 | 1.003414 | 1.007253 | 3.447948 | 3.334085 | 3.255916 |
| 0.00248 | 4.467314 | 4.349795 | 4.273559 | 1.000216 | 1.003293 | 1.007132 | 3.446879 | 3.333559 | 3.255395 |
|  |  |  |  |  |  |  |  |  |  |
| *α*PMZ = 0.4 | | | | | | | | | |
| 0.00000 | 4.469857 | 4.351374 | 4.274879 | 1.002141 | 1.005183 | 1.009070 | 3.467716 | 3.346191 | 3.265809 |
| 0.00016 | 4.469586 | 4.351233 | 4.274690 | 1.001860 | 1.004941 | 1.008868 | 3.465579 | 3.345139 | 3.264247 |
| 0.00049 | 4.469106 | 4.350895 | 4.274305 | 1.001299 | 1.004459 | 1.008383 | 3.461839 | 3.342507 | 3.261123 |
| 0.00082 | 4.468616 | 4.350499 | 4.273919 | 1.000657 | 1.003977 | 1.007899 | 3.458099 | 3.339349 | 3.257999 |
| 0.00098 | 4.468411 | 4.350358 | 4.273726 | 1.000417 | 1.003735 | 1.007657 | 3.456496 | 3.338296 | 3.256437 |
| 0.00115 | 4.468136 | 4.350160 | 4.273534 | 1.000096 | 1.003494 | 1.007415 | 3.454359 | 3.336717 | 3.254874 |
| 0.00132 | 4.467926 | 4.350019 | 4.273341 | 0.999816 | 1.003253 | 1.007172 | 3.452756 | 3.335664 | 3.253312 |
| 0.00147 | 4.467656 | 4.349821 | 4.273148 | 0.999535 | 1.003012 | 1.006930 | 3.450619 | 3.334085 | 3.251750 |
| 0.00164 | 4.467578 | 4.349685 | 4.272955 | 0.999375 | 1.002810 | 1.006688 | 3.450085 | 3.333032 | 3.250188 |
| 0.00197 | 4.467304 | 4.349487 | 4.272763 | 0.999054 | 1.002569 | 1.006446 | 3.447948 | 3.331453 | 3.248626 |
| 0.00230 | 4.467034 | 4.349346 | 4.272630 | 0.998773 | 1.002328 | 1.006244 | 3.445810 | 3.330401 | 3.247585 |
| 0.00263 | 4.466819 | 4.349148 | 4.272501 | 0.998453 | 1.002087 | 1.006083 | 3.444208 | 3.328822 | 3.246543 |
| 0.00296 | 4.466549 | 4.349008 | 4.272313 | 0.998172 | 1.001846 | 1.005881 | 3.442070 | 3.327769 | 3.244981 |
| 0.00328 | 4.466334 | 4.348810 | 4.272180 | 0.997851 | 1.001604 | 1.005679 | 3.440468 | 3.326190 | 3.243940 |
|  |  |  |  |  |  |  |  |  |  |
| *α*PMZ = 0.6 | | | | | | | | | |
| 0.00000 | 4.469857 | 4.351374 | 4.274879 | 1.002141 | 1.005183 | 1.009070 | 3.467716 | 3.346191 | 3.265809 |
| 0.00024 | 4.469573 | 4.351097 | 4.274669 | 1.001740 | 1.004740 | 1.008666 | 3.465579 | 3.344086 | 3.264247 |
| 0.00072 | 4.468975 | 4.350578 | 4.274236 | 1.000657 | 1.003655 | 1.007738 | 3.461305 | 3.340401 | 3.261123 |
| 0.00120 | 4.468385 | 4.350059 | 4.273807 | 0.999655 | 1.002569 | 1.006850 | 3.457030 | 3.336717 | 3.257999 |
| 0.00144 | 4.468093 | 4.349769 | 4.273588 | 0.999174 | 1.002006 | 1.006365 | 3.454893 | 3.334611 | 3.256437 |
| 0.00168 | 4.467796 | 4.349475 | 4.273370 | 0.998653 | 1.001403 | 1.005881 | 3.452756 | 3.332506 | 3.254874 |
| 0.00193 | 4.467503 | 4.349193 | 4.273160 | 0.998172 | 1.000921 | 1.005477 | 3.450619 | 3.330401 | 3.253312 |
| 0.00216 | 4.467284 | 4.348965 | 4.272950 | 0.997811 | 1.000398 | 1.005074 | 3.449016 | 3.328822 | 3.251750 |
| 0.00240 | 4.467129 | 4.348824 | 4.272800 | 0.997491 | 1.000157 | 1.004710 | 3.447948 | 3.327769 | 3.250709 |
| 0.00288 | 4.466755 | 4.348644 | 4.272628 | 0.996809 | 0.999554 | 1.004145 | 3.445276 | 3.326716 | 3.249667 |
| 0.00337 | 4.466440 | 4.348411 | 4.272401 | 0.996128 | 0.998991 | 1.003580 | 3.443139 | 3.325137 | 3.248105 |
| 0.00385 | 4.466075 | 4.348179 | 4.272238 | 0.995526 | 0.998428 | 1.003096 | 3.440468 | 3.323558 | 3.247064 |
| 0.00433 | 4.465760 | 4.348003 | 4.272015 | 0.994845 | 0.997865 | 1.002571 | 3.438330 | 3.322505 | 3.245502 |
| 0.00480 | 4.465450 | 4.347770 | 4.271848 | 0.994204 | 0.997302 | 1.002046 | 3.436193 | 3.320926 | 3.244460 |
|  |  |  |  |  |  |  |  |  |  |
| *α*PMZ = 0.8 | | | | | | | | | |
| 0.00000 | 4.469857 | 4.351374 | 4.274879 | 1.002141 | 1.005183 | 1.009070 | 3.467716 | 3.346191 | 3.265809 |
| 0.00045 | 4.469189 | 4.350794 | 4.274441 | 1.000978 | 1.004057 | 1.008101 | 3.462907 | 3.341980 | 3.262685 |
| 0.00136 | 4.467747 | 4.349673 | 4.273498 | 0.998212 | 1.001644 | 1.005518 | 3.452756 | 3.334085 | 3.256437 |
| 0.00225 | 4.466318 | 4.348425 | 4.272576 | 0.995567 | 0.999111 | 1.003136 | 3.442605 | 3.325137 | 3.250188 |
| 0.00270 | 4.465638 | 4.347950 | 4.272109 | 0.994284 | 0.997905 | 1.001885 | 3.437796 | 3.321979 | 3.247064 |
| 0.00315 | 4.464945 | 4.347357 | 4.271590 | 0.992881 | 0.996659 | 1.000674 | 3.432988 | 3.317768 | 3.243419 |
| 0.00361 | 4.464347 | 4.346712 | 4.271123 | 0.991798 | 0.995453 | 0.999423 | 3.428713 | 3.313031 | 3.240295 |
| 0.00405 | 4.463973 | 4.346272 | 4.270660 | 0.991117 | 0.994568 | 0.998212 | 3.426042 | 3.309873 | 3.237170 |
| 0.00450 | 4.463599 | 4.346035 | 4.270356 | 0.990436 | 0.993965 | 0.997445 | 3.423370 | 3.308294 | 3.235088 |
| 0.00540 | 4.462911 | 4.345425 | 4.269855 | 0.989073 | 0.992558 | 0.996396 | 3.418562 | 3.304083 | 3.231443 |
| 0.00631 | 4.462163 | 4.344776 | 4.269346 | 0.987710 | 0.991311 | 0.995265 | 3.413219 | 3.299345 | 3.227798 |
| 0.00721 | 4.461429 | 4.344249 | 4.268832 | 0.986467 | 0.990145 | 0.994095 | 3.407876 | 3.295661 | 3.224153 |
| 0.00812 | 4.460668 | 4.343639 | 4.268323 | 0.984984 | 0.988738 | 0.992965 | 3.402533 | 3.291450 | 3.220508 |
| 0.00901 | 4.459994 | 4.343043 | 4.267818 | 0.983741 | 0.987451 | 0.991875 | 3.397725 | 3.287239 | 3.216863 |
|  |  |  |  |  |  |  |  |  |  |
| *m*B = 0.05 **mol·kg−1** G | | | | | | | | | |
| *α*PMZ = 0.2 | | | | | | | | | |
| 0.00000 | 4.458050 | 4.340555 | 4.264677 | 1.001337 | 1.004386 | 1.008274 | 3.456713 | 3.336168 | 3.256403 |
| 0.00012 | 4.457913 | 4.340427 | 4.264553 | 1.001257 | 1.004326 | 1.008213 | 3.456180 | 3.335642 | 3.255883 |
| 0.00037 | 4.457580 | 4.340169 | 4.264305 | 1.001096 | 1.004185 | 1.008092 | 3.454845 | 3.334591 | 3.254842 |
| 0.00062 | 4.457252 | 4.339914 | 4.264113 | 1.000956 | 1.004065 | 1.007971 | 3.453511 | 3.333539 | 3.254062 |
| 0.00074 | 4.457115 | 4.339783 | 4.263985 | 1.000876 | 1.003984 | 1.007891 | 3.452977 | 3.333013 | 3.253541 |
| 0.00087 | 4.456978 | 4.339655 | 4.263861 | 1.000796 | 1.003924 | 1.007830 | 3.452443 | 3.332487 | 3.253021 |
| 0.00100 | 4.456782 | 4.339528 | 4.263737 | 1.000716 | 1.003864 | 1.007770 | 3.451642 | 3.331961 | 3.252501 |
| 0.00112 | 4.456645 | 4.339401 | 4.263669 | 1.000636 | 1.003804 | 1.007709 | 3.451109 | 3.331435 | 3.252241 |
| 0.00124 | 4.456577 | 4.339331 | 4.263545 | 1.000596 | 1.003743 | 1.007649 | 3.450842 | 3.331172 | 3.251720 |
| 0.00149 | 4.456499 | 4.339204 | 4.263422 | 1.000516 | 1.003683 | 1.007588 | 3.450575 | 3.330646 | 3.251200 |
| 0.00175 | 4.456422 | 4.339134 | 4.263357 | 1.000436 | 1.003623 | 1.007548 | 3.450308 | 3.330383 | 3.250940 |
| 0.00200 | 4.456285 | 4.339011 | 4.263234 | 1.000355 | 1.003583 | 1.007487 | 3.449774 | 3.329857 | 3.250420 |
| 0.00225 | 4.456208 | 4.338941 | 4.263170 | 1.000275 | 1.003522 | 1.007447 | 3.449507 | 3.329594 | 3.250160 |
| 0.00248 | 4.456071 | 4.338814 | 4.263106 | 1.000195 | 1.003462 | 1.007407 | 3.448973 | 3.329069 | 3.249899 |
|  |  |  |  |  |  |  |  |  |  |
| *α*PMZ = 0.4 | | | | | | | | | |
| 0.00000 | 4.458050 | 4.340555 | 4.264677 | 1.001337 | 1.004386 | 1.008274 | 3.456713 | 3.336168 | 3.256403 |
| 0.00016 | 4.457836 | 4.340414 | 4.264544 | 1.001177 | 1.004266 | 1.008173 | 3.455913 | 3.335642 | 3.255883 |
| 0.00049 | 4.457412 | 4.340072 | 4.264267 | 1.000876 | 1.004004 | 1.007911 | 3.454311 | 3.334328 | 3.254842 |
| 0.00082 | 4.456988 | 4.339730 | 4.263989 | 1.000576 | 1.003743 | 1.007649 | 3.452710 | 3.333013 | 3.253802 |
| 0.00098 | 4.456779 | 4.339586 | 4.263852 | 1.000436 | 1.003603 | 1.007528 | 3.451909 | 3.332487 | 3.253281 |
| 0.00115 | 4.456565 | 4.339384 | 4.263711 | 1.000275 | 1.003462 | 1.007387 | 3.451109 | 3.331698 | 3.252761 |
| 0.00132 | 4.456351 | 4.339244 | 4.263575 | 1.000115 | 1.003342 | 1.007266 | 3.450308 | 3.331172 | 3.252241 |
| 0.00147 | 4.456205 | 4.339099 | 4.263434 | 0.999995 | 1.003201 | 1.007124 | 3.449774 | 3.330646 | 3.251720 |
| 0.00164 | 4.456128 | 4.338968 | 4.263297 | 0.999915 | 1.003121 | 1.007003 | 3.449507 | 3.330120 | 3.251200 |
| 0.00197 | 4.455977 | 4.338880 | 4.263216 | 0.999775 | 1.002980 | 1.006882 | 3.448973 | 3.329857 | 3.250940 |
| 0.00230 | 4.455823 | 4.338736 | 4.263134 | 0.999614 | 1.002839 | 1.006761 | 3.448440 | 3.329332 | 3.250680 |
| 0.00263 | 4.455677 | 4.338591 | 4.262998 | 0.999494 | 1.002699 | 1.006640 | 3.447906 | 3.328806 | 3.250160 |
| 0.00296 | 4.455523 | 4.338499 | 4.262917 | 0.999334 | 1.002538 | 1.006519 | 3.447372 | 3.328543 | 3.249899 |
| 0.00328 | 4.455373 | 4.338359 | 4.262840 | 0.999194 | 1.002418 | 1.006419 | 3.446838 | 3.328017 | 3.249639 |
|  |  |  |  |  |  |  |  |  |  |
| *α*PMZ = 0.6 | | | | | | | | | |
| 0.00000 | 4.458050 | 4.340555 | 4.264677 | 1.001337 | 1.004386 | 1.008274 | 3.456713 | 3.336168 | 3.256403 |
| 0.00024 | 4.457763 | 4.340331 | 4.264455 | 1.001116 | 1.004145 | 1.008012 | 3.455646 | 3.335379 | 3.255623 |
| 0.00072 | 4.457035 | 4.339875 | 4.264027 | 1.000516 | 1.003623 | 1.007568 | 3.452977 | 3.333802 | 3.254062 |
| 0.00120 | 4.456361 | 4.339433 | 4.263591 | 0.999895 | 1.003161 | 1.007084 | 3.450575 | 3.332224 | 3.252501 |
| 0.00144 | 4.455997 | 4.339209 | 4.263378 | 0.999594 | 1.002920 | 1.006862 | 3.449240 | 3.331435 | 3.251720 |
| 0.00168 | 4.455637 | 4.338986 | 4.263160 | 0.999314 | 1.002679 | 1.006620 | 3.447906 | 3.330646 | 3.250940 |
| 0.00193 | 4.455405 | 4.338762 | 4.262946 | 0.999074 | 1.002438 | 1.006399 | 3.447105 | 3.329857 | 3.250160 |
| 0.00216 | 4.455260 | 4.338614 | 4.262728 | 0.998954 | 1.002277 | 1.006157 | 3.446571 | 3.329332 | 3.249379 |
| 0.00240 | 4.455164 | 4.338526 | 4.262638 | 0.998793 | 1.002136 | 1.005995 | 3.446305 | 3.329069 | 3.249119 |
| 0.00288 | 4.454924 | 4.338294 | 4.262467 | 0.998513 | 1.001855 | 1.005713 | 3.445504 | 3.328280 | 3.248599 |
| 0.00337 | 4.454674 | 4.338066 | 4.262245 | 0.998193 | 1.001594 | 1.005451 | 3.444703 | 3.327491 | 3.247818 |
| 0.00385 | 4.454374 | 4.337839 | 4.262070 | 0.997912 | 1.001333 | 1.005148 | 3.443636 | 3.326702 | 3.247298 |
| 0.00433 | 4.454129 | 4.337615 | 4.261903 | 0.997612 | 1.001092 | 1.004886 | 3.442835 | 3.325913 | 3.246778 |
| 0.00480 | 4.453888 | 4.337445 | 4.261737 | 0.997331 | 1.000831 | 1.004624 | 3.442034 | 3.325387 | 3.246257 |
|  |  |  |  |  |  |  |  |  |  |
| *α*PMZ = 0.8 | | | | | | | | | |
| 0.00000 | 4.458050 | 4.340555 | 4.264677 | 1.001337 | 1.004386 | 1.008274 | 3.456713 | 3.336168 | 3.256403 |
| 0.00045 | 4.457491 | 4.340029 | 4.264228 | 1.000696 | 1.003804 | 1.007729 | 3.454845 | 3.334328 | 3.254842 |
| 0.00136 | 4.456263 | 4.338850 | 4.263275 | 0.999454 | 1.002578 | 1.006640 | 3.450575 | 3.330120 | 3.251460 |
| 0.00225 | 4.455103 | 4.337672 | 4.262360 | 0.998253 | 1.001353 | 1.005471 | 3.446571 | 3.325913 | 3.248339 |
| 0.00270 | 4.454494 | 4.337081 | 4.261959 | 0.997652 | 1.000730 | 1.004886 | 3.444436 | 3.323809 | 3.247038 |
| 0.00315 | 4.453889 | 4.336551 | 4.261468 | 0.997071 | 1.000128 | 1.004402 | 3.442301 | 3.321969 | 3.245217 |
| 0.00361 | 4.453494 | 4.335943 | 4.261015 | 0.996631 | 0.999424 | 1.003837 | 3.440967 | 3.319865 | 3.243656 |
| 0.00405 | 4.453190 | 4.335711 | 4.260507 | 0.996330 | 0.999143 | 1.003273 | 3.439899 | 3.319076 | 3.241835 |
| 0.00450 | 4.452799 | 4.335479 | 4.260327 | 0.995910 | 0.998862 | 1.002950 | 3.438565 | 3.318287 | 3.241315 |
| 0.00540 | 4.452177 | 4.334989 | 4.259922 | 0.995249 | 0.998179 | 1.002345 | 3.436429 | 3.316710 | 3.240014 |
| 0.00631 | 4.451491 | 4.334469 | 4.259516 | 0.994568 | 0.997617 | 1.001740 | 3.434027 | 3.314869 | 3.238713 |
| 0.00721 | 4.450847 | 4.333983 | 4.259063 | 0.993807 | 0.996954 | 1.001176 | 3.431892 | 3.313291 | 3.237152 |
| 0.00812 | 4.450161 | 4.333520 | 4.258649 | 0.993126 | 0.996391 | 1.000530 | 3.429490 | 3.311713 | 3.235852 |
| 0.00901 | 4.449526 | 4.333048 | 4.258248 | 0.992405 | 0.995789 | 0.999946 | 3.427355 | 3.310136 | 3.234551 |
|  |  |  |  |  |  |  |  |  |  |
| *m*B = 0.10 **mol·kg−1** G | | | | | | | | | |
| *α*PMZ = 0.2 | | | | | | | | | |
| 0.00000 | 4.431430 | 4.315248 | 4.240380 | 0.999759 | 1.002828 | 1.006720 | 3.431671 | 3.312420 | 3.233661 |
| 0.00012 | 4.431277 | 4.315109 | 4.240245 | 0.999679 | 1.002768 | 1.006659 | 3.431405 | 3.312158 | 3.233401 |
| 0.00037 | 4.431038 | 4.314878 | 4.240028 | 0.999539 | 1.002627 | 1.006539 | 3.431005 | 3.311764 | 3.233012 |
| 0.00062 | 4.430790 | 4.314591 | 4.239867 | 0.999379 | 1.002487 | 1.006418 | 3.430606 | 3.311239 | 3.232752 |
| 0.00074 | 4.430641 | 4.314448 | 4.239731 | 0.999309 | 1.002417 | 1.006357 | 3.430340 | 3.310977 | 3.232492 |
| 0.00087 | 4.430546 | 4.314309 | 4.239596 | 0.999229 | 1.002357 | 1.006297 | 3.430206 | 3.310715 | 3.232233 |
| 0.00100 | 4.430393 | 4.314161 | 4.239511 | 0.999149 | 1.002276 | 1.006227 | 3.429940 | 3.310452 | 3.232103 |
| 0.00112 | 4.430316 | 4.314022 | 4.239430 | 0.999109 | 1.002216 | 1.006166 | 3.429807 | 3.310190 | 3.231973 |
| 0.00124 | 4.430312 | 4.313952 | 4.239295 | 0.999099 | 1.002186 | 1.006106 | 3.429807 | 3.310059 | 3.231714 |
| 0.00149 | 4.430176 | 4.313878 | 4.239218 | 0.999059 | 1.002146 | 1.006055 | 3.429541 | 3.309927 | 3.231584 |
| 0.00175 | 4.430104 | 4.313805 | 4.239091 | 0.999029 | 1.002106 | 1.006015 | 3.429408 | 3.309796 | 3.231324 |
| 0.00200 | 4.430032 | 4.313678 | 4.239019 | 0.998999 | 1.002076 | 1.005975 | 3.429274 | 3.309534 | 3.231194 |
| 0.00225 | 4.429900 | 4.313605 | 4.238943 | 0.998969 | 1.002036 | 1.005925 | 3.429008 | 3.309403 | 3.231065 |
| 0.00248 | 4.429828 | 4.313535 | 4.238871 | 0.998939 | 1.002006 | 1.005884 | 3.428875 | 3.309271 | 3.230935 |
|  |  |  |  |  |  |  |  |  |  |
| *α*PMZ = 0.4 | | | | | | | | | |
| 0.00000 | 4.431430 | 4.315248 | 4.240380 | 0.999759 | 1.002828 | 1.006720 | 3.431671 | 3.312420 | 3.233661 |
| 0.00016 | 4.431327 | 4.315092 | 4.240236 | 0.999659 | 1.002728 | 1.006639 | 3.431538 | 3.312158 | 3.233401 |
| 0.00049 | 4.431061 | 4.314787 | 4.240054 | 0.999459 | 1.002547 | 1.006468 | 3.431139 | 3.311633 | 3.233141 |
| 0.00082 | 4.430859 | 4.314479 | 4.239816 | 0.999269 | 1.002357 | 1.006297 | 3.430872 | 3.311108 | 3.232752 |
| 0.00098 | 4.430692 | 4.314327 | 4.239722 | 0.999159 | 1.002266 | 1.006206 | 3.430606 | 3.310846 | 3.232622 |
| 0.00115 | 4.430594 | 4.314174 | 4.239629 | 0.999069 | 1.002176 | 1.006116 | 3.430473 | 3.310583 | 3.232492 |
| 0.00132 | 4.430490 | 4.314075 | 4.239481 | 0.998969 | 1.002076 | 1.006025 | 3.430340 | 3.310452 | 3.232233 |
| 0.00147 | 4.430405 | 4.313927 | 4.239391 | 0.998909 | 1.001996 | 1.005945 | 3.430206 | 3.310190 | 3.232103 |
| 0.00164 | 4.430324 | 4.313849 | 4.239306 | 0.998859 | 1.001945 | 1.005874 | 3.430073 | 3.310059 | 3.231973 |
| 0.00197 | 4.430225 | 4.313696 | 4.239213 | 0.998769 | 1.001855 | 1.005784 | 3.429940 | 3.309796 | 3.231843 |
| 0.00230 | 4.430063 | 4.313601 | 4.239120 | 0.998669 | 1.001765 | 1.005693 | 3.429674 | 3.309665 | 3.231714 |
| 0.00263 | 4.429959 | 4.313453 | 4.238975 | 0.998569 | 1.001685 | 1.005612 | 3.429541 | 3.309403 | 3.231454 |
| 0.00296 | 4.429865 | 4.313362 | 4.238882 | 0.998489 | 1.001605 | 1.005522 | 3.429408 | 3.309271 | 3.231324 |
| 0.00328 | 4.429703 | 4.313210 | 4.238789 | 0.998389 | 1.001514 | 1.005431 | 3.429141 | 3.309009 | 3.231194 |
|  |  |  |  |  |  |  |  |  |  |
| *α*PMZ = 0.6 | | | | | | | | | |
| 0.00000 | 4.431430 | 4.315248 | 4.240380 | 0.999759 | 1.002828 | 1.006720 | 3.431671 | 3.312420 | 3.233661 |
| 0.00024 | 4.431241 | 4.315066 | 4.240211 | 0.999599 | 1.002668 | 1.006579 | 3.431405 | 3.312158 | 3.233401 |
| 0.00072 | 4.430909 | 4.314640 | 4.239900 | 0.999249 | 1.002337 | 1.006237 | 3.431005 | 3.311502 | 3.233012 |
| 0.00120 | 4.430518 | 4.314218 | 4.239658 | 0.998899 | 1.002016 | 1.005925 | 3.430473 | 3.310846 | 3.232752 |
| 0.00144 | 4.430321 | 4.314032 | 4.239480 | 0.998719 | 1.001845 | 1.005763 | 3.430206 | 3.310583 | 3.232492 |
| 0.00168 | 4.430123 | 4.313797 | 4.239344 | 0.998539 | 1.001695 | 1.005572 | 3.429940 | 3.310190 | 3.232363 |
| 0.00193 | 4.430002 | 4.313615 | 4.239229 | 0.998399 | 1.001534 | 1.005431 | 3.429807 | 3.309927 | 3.232233 |
| 0.00216 | 4.429958 | 4.313506 | 4.239050 | 0.998299 | 1.001414 | 1.005270 | 3.429807 | 3.309796 | 3.231973 |
| 0.00240 | 4.429854 | 4.313415 | 4.239016 | 0.998199 | 1.001334 | 1.005190 | 3.429674 | 3.309665 | 3.231973 |
| 0.00288 | 4.429716 | 4.313276 | 4.238834 | 0.998019 | 1.001143 | 1.005018 | 3.429541 | 3.309534 | 3.231714 |
| 0.00337 | 4.429573 | 4.313085 | 4.238710 | 0.997830 | 1.000963 | 1.004857 | 3.429408 | 3.309271 | 3.231584 |
| 0.00385 | 4.429421 | 4.312951 | 4.238583 | 0.997620 | 1.000782 | 1.004686 | 3.429274 | 3.309140 | 3.231454 |
| 0.00433 | 4.429278 | 4.312764 | 4.238409 | 0.997430 | 1.000612 | 1.004535 | 3.429141 | 3.308878 | 3.231194 |
| 0.00480 | 4.429134 | 4.312634 | 4.238281 | 0.997240 | 1.000441 | 1.004364 | 3.429008 | 3.308747 | 3.231065 |
|  |  |  |  |  |  |  |  |  |  |
| *α*PMZ = 0.8 | | | | | | | | | |
| 0.00000 | 4.431430 | 4.315248 | 4.240380 | 0.999759 | 1.002828 | 1.006720 | 3.431671 | 3.312420 | 3.233661 |
| 0.00045 | 4.430993 | 4.314953 | 4.240092 | 0.999439 | 1.002537 | 1.006428 | 3.431005 | 3.312027 | 3.233271 |
| 0.00136 | 4.430111 | 4.314214 | 4.239526 | 0.998779 | 1.001875 | 1.005743 | 3.429674 | 3.310977 | 3.232622 |
| 0.00225 | 4.429225 | 4.313515 | 4.238969 | 0.998109 | 1.001173 | 1.005079 | 3.428342 | 3.310059 | 3.231973 |
| 0.00270 | 4.428779 | 4.313220 | 4.238710 | 0.997770 | 1.000882 | 1.004727 | 3.427677 | 3.309665 | 3.231714 |
| 0.00315 | 4.428339 | 4.312847 | 4.238408 | 0.997440 | 1.000542 | 1.004404 | 3.427011 | 3.309140 | 3.231324 |
| 0.00361 | 4.428132 | 4.312552 | 4.238145 | 0.997240 | 1.000251 | 1.004042 | 3.426744 | 3.308747 | 3.231065 |
| 0.00405 | 4.427930 | 4.312365 | 4.237941 | 0.997050 | 1.000080 | 1.003821 | 3.426478 | 3.308484 | 3.230805 |
| 0.00450 | 4.427787 | 4.312235 | 4.237835 | 0.996860 | 0.999910 | 1.003700 | 3.426345 | 3.308353 | 3.230675 |
| 0.00540 | 4.427438 | 4.311888 | 4.237588 | 0.996470 | 0.999499 | 1.003378 | 3.425946 | 3.307959 | 3.230416 |
| 0.00631 | 4.427029 | 4.311576 | 4.237401 | 0.996080 | 0.999168 | 1.003065 | 3.425413 | 3.307566 | 3.230286 |
| 0.00721 | 4.426680 | 4.311251 | 4.237155 | 0.995690 | 0.998807 | 1.002743 | 3.425013 | 3.307172 | 3.230026 |
| 0.00812 | 4.426322 | 4.310913 | 4.236921 | 0.995280 | 0.998416 | 1.002451 | 3.424614 | 3.306779 | 3.229767 |
| 0.00901 | 4.425986 | 4.310592 | 4.236670 | 0.994920 | 0.998065 | 1.002119 | 3.424215 | 3.306385 | 3.229507 |
|  |  |  |  |  |  |  |  |  |  |
| *m*B = 0.025 **mol·kg−1** GG | | | | | | | | | |
| *α*PMZ = 0.2 | | | | | | | | | |
| 0.00000 | 4.453478 | 4.335422 | 4.259244 | 1.001538 | 1.004584 | 1.008470 | 3.451940 | 3.330838 | 3.250774 |
| 0.00012 | 4.453287 | 4.334782 | 4.258346 | 1.001418 | 1.004463 | 1.008349 | 3.450340 | 3.325057 | 3.242456 |
| 0.00037 | 4.452840 | 4.333670 | 4.256771 | 1.001138 | 1.004182 | 1.008107 | 3.446605 | 3.315072 | 3.227898 |
| 0.00062 | 4.452393 | 4.332392 | 4.255197 | 1.000857 | 1.003941 | 1.007865 | 3.442871 | 3.303510 | 3.213341 |
| 0.00074 | 4.452197 | 4.331862 | 4.254355 | 1.000697 | 1.003780 | 1.007744 | 3.441271 | 3.298780 | 3.205542 |
| 0.00087 | 4.452006 | 4.331224 | 4.253509 | 1.000577 | 1.003660 | 1.007583 | 3.439670 | 3.292999 | 3.197744 |
| 0.00100 | 4.451750 | 4.330581 | 4.252667 | 1.000417 | 1.003499 | 1.007462 | 3.437536 | 3.287218 | 3.189945 |
| 0.00112 | 4.451559 | 4.329999 | 4.251937 | 1.000296 | 1.003378 | 1.007341 | 3.435936 | 3.281962 | 3.183186 |
| 0.00124 | 4.451431 | 4.329592 | 4.251151 | 1.000216 | 1.003298 | 1.007220 | 3.434869 | 3.278283 | 3.175908 |
| 0.00149 | 4.451231 | 4.328950 | 4.250365 | 1.000016 | 1.003137 | 1.007099 | 3.433269 | 3.272502 | 3.168629 |
| 0.00175 | 4.450976 | 4.328307 | 4.249580 | 0.999856 | 1.002977 | 1.006978 | 3.431135 | 3.266721 | 3.161350 |
| 0.00200 | 4.450716 | 4.327721 | 4.248850 | 0.999655 | 1.002816 | 1.006857 | 3.429001 | 3.261466 | 3.154592 |
| 0.00225 | 4.450461 | 4.327027 | 4.248124 | 0.999495 | 1.002695 | 1.006776 | 3.426867 | 3.255159 | 3.147833 |
| 0.00248 | 4.450206 | 4.326441 | 4.247395 | 0.999335 | 1.002535 | 1.006655 | 3.424733 | 3.249904 | 3.141074 |
|  |  |  |  |  |  |  |  |  |  |
| *α*PMZ = 0.4 | | | | | | | | | |
| 0.00000 | 4.453478 | 4.335422 | 4.259244 | 1.001538 | 1.004584 | 1.008470 | 3.451940 | 3.330838 | 3.250774 |
| 0.00016 | 4.453333 | 4.335286 | 4.259001 | 1.001298 | 1.004383 | 1.008268 | 3.450873 | 3.329787 | 3.248695 |
| 0.00049 | 4.453033 | 4.334778 | 4.258571 | 1.000737 | 1.003901 | 1.007865 | 3.448739 | 3.325583 | 3.245055 |
| 0.00082 | 4.452724 | 4.334332 | 4.258085 | 1.000096 | 1.003459 | 1.007462 | 3.446605 | 3.321904 | 3.240896 |
| 0.00098 | 4.452574 | 4.334074 | 4.257843 | 0.999816 | 1.003177 | 1.007260 | 3.445538 | 3.319802 | 3.238816 |
| 0.00115 | 4.452424 | 4.333820 | 4.257659 | 0.999535 | 1.002936 | 1.007099 | 3.444472 | 3.317699 | 3.237257 |
| 0.00132 | 4.452274 | 4.333627 | 4.257412 | 0.999255 | 1.002735 | 1.006857 | 3.443405 | 3.316123 | 3.235177 |
| 0.00147 | 4.452124 | 4.333373 | 4.257174 | 0.998974 | 1.002494 | 1.006695 | 3.442338 | 3.314021 | 3.233097 |
| 0.00164 | 4.452047 | 4.333185 | 4.256986 | 0.998814 | 1.002334 | 1.006494 | 3.441804 | 3.312444 | 3.231538 |
| 0.00197 | 4.451884 | 4.332988 | 4.256684 | 0.998414 | 1.002093 | 1.006252 | 3.440737 | 3.310867 | 3.228938 |
| 0.00230 | 4.451665 | 4.332735 | 4.256386 | 0.998053 | 1.001851 | 1.006050 | 3.439137 | 3.308765 | 3.226339 |
| 0.00263 | 4.451502 | 4.332420 | 4.256139 | 0.997652 | 1.001570 | 1.005808 | 3.438070 | 3.306137 | 3.224259 |
| 0.00296 | 4.451339 | 4.332218 | 4.255837 | 0.997252 | 1.001289 | 1.005566 | 3.437003 | 3.304561 | 3.221659 |
| 0.00328 | 4.451116 | 4.331965 | 4.255594 | 0.996851 | 1.001048 | 1.005364 | 3.435403 | 3.302458 | 3.219580 |
|  |  |  |  |  |  |  |  |  |  |
| *α*PMZ = 0.6 | | | | | | | | | |
| 0.00000 | 4.453478 | 4.335422 | 4.259244 | 1.001538 | 1.004584 | 1.008470 | 3.451940 | 3.330838 | 3.250774 |
| 0.00024 | 4.453192 | 4.335286 | 4.258925 | 1.001098 | 1.004182 | 1.008067 | 3.449806 | 3.329787 | 3.248175 |
| 0.00072 | 4.452720 | 4.334778 | 4.258336 | 1.000056 | 1.003298 | 1.007220 | 3.446605 | 3.326634 | 3.243496 |
| 0.00120 | 4.452210 | 4.334332 | 4.257748 | 0.999215 | 1.002414 | 1.006373 | 3.442871 | 3.324006 | 3.238816 |
| 0.00144 | 4.451924 | 4.334074 | 4.257433 | 0.998774 | 1.001972 | 1.006009 | 3.440737 | 3.322955 | 3.236217 |
| 0.00168 | 4.451743 | 4.333820 | 4.257109 | 0.998213 | 1.001530 | 1.005566 | 3.439670 | 3.321378 | 3.233617 |
| 0.00193 | 4.451452 | 4.333627 | 4.256845 | 0.997733 | 1.001048 | 1.005162 | 3.437536 | 3.319802 | 3.231538 |
| 0.00216 | 4.451238 | 4.333373 | 4.256517 | 0.997412 | 1.000606 | 1.004678 | 3.435936 | 3.318750 | 3.228938 |
| 0.00240 | 4.451134 | 4.333185 | 4.256325 | 0.997011 | 1.000365 | 1.004436 | 3.435403 | 3.317699 | 3.227378 |
| 0.00288 | 4.450766 | 4.332988 | 4.256031 | 0.996370 | 0.999682 | 1.003751 | 3.432735 | 3.316123 | 3.225299 |
| 0.00337 | 4.450448 | 4.332735 | 4.255681 | 0.995649 | 0.998998 | 1.003065 | 3.430601 | 3.314546 | 3.222699 |
| 0.00385 | 4.450140 | 4.332420 | 4.255392 | 0.995008 | 0.998315 | 1.002419 | 3.428468 | 3.312969 | 3.220620 |
| 0.00433 | 4.449772 | 4.332218 | 4.255042 | 0.994367 | 0.997672 | 1.001734 | 3.425800 | 3.311393 | 3.218020 |
| 0.00480 | 4.449454 | 4.331965 | 4.254761 | 0.993646 | 0.996989 | 1.001169 | 3.423666 | 3.309816 | 3.215941 |
|  |  |  |  |  |  |  |  |  |  |
| *α*PMZ = 0.8 | | | | | | | | | |
| 0.00000 | 4.453478 | 4.335422 | 4.259244 | 1.001538 | 1.004584 | 1.008470 | 3.451940 | 3.330838 | 3.250774 |
| 0.00045 | 4.453125 | 4.335155 | 4.258928 | 1.000497 | 1.003700 | 1.007583 | 3.449806 | 3.329261 | 3.248695 |
| 0.00136 | 4.452295 | 4.334473 | 4.258373 | 0.998374 | 1.001610 | 1.005485 | 3.444472 | 3.325057 | 3.245575 |
| 0.00225 | 4.451405 | 4.333870 | 4.257831 | 0.996250 | 0.999722 | 1.003508 | 3.438603 | 3.321378 | 3.242456 |
| 0.00270 | 4.450993 | 4.333533 | 4.257574 | 0.995209 | 0.998717 | 1.002661 | 3.435936 | 3.319276 | 3.240896 |
| 0.00315 | 4.450644 | 4.333175 | 4.257237 | 0.994207 | 0.997512 | 1.001572 | 3.433802 | 3.317174 | 3.238816 |
| 0.00361 | 4.450240 | 4.332860 | 4.257019 | 0.993246 | 0.996708 | 1.000564 | 3.431135 | 3.315072 | 3.237777 |
| 0.00405 | 4.449973 | 4.332708 | 4.256742 | 0.992444 | 0.995824 | 0.999515 | 3.429535 | 3.314546 | 3.236217 |
| 0.00450 | 4.449660 | 4.332472 | 4.256503 | 0.991763 | 0.995221 | 0.998829 | 3.427401 | 3.312969 | 3.234657 |
| 0.00540 | 4.449084 | 4.332101 | 4.256118 | 0.990321 | 0.993895 | 0.997296 | 3.423666 | 3.310867 | 3.232578 |
| 0.00631 | 4.448423 | 4.331655 | 4.255802 | 0.988639 | 0.992408 | 0.995884 | 3.419399 | 3.308239 | 3.231018 |
| 0.00721 | 4.447793 | 4.331275 | 4.255422 | 0.987236 | 0.991002 | 0.994392 | 3.415131 | 3.306137 | 3.228938 |
| 0.00812 | 4.447208 | 4.330896 | 4.255051 | 0.985714 | 0.989596 | 0.992980 | 3.411397 | 3.304035 | 3.226859 |
| 0.00901 | 4.446638 | 4.330463 | 4.254676 | 0.984312 | 0.988229 | 0.991528 | 3.407662 | 3.301407 | 3.224779 |
|  |  |  |  |  |  |  |  |  |  |
| *m*B = 0.05 **mol·kg−1** GG | | | | | | | | | |
| *α*PMZ = 0.2 | | | | | | | | | |
| 0.00000 | 4.437586 | 4.320891 | 4.245758 | 1.000135 | 1.003191 | 1.007081 | 3.437451 | 3.317700 | 3.238677 |
| 0.00012 | 4.437382 | 4.320756 | 4.245626 | 1.000015 | 1.003091 | 1.006980 | 3.436652 | 3.317175 | 3.238157 |
| 0.00037 | 4.437025 | 4.320412 | 4.245295 | 0.999735 | 1.002810 | 1.006718 | 3.435320 | 3.315863 | 3.236859 |
| 0.00062 | 4.436608 | 4.320133 | 4.245023 | 0.999455 | 1.002569 | 1.006477 | 3.433721 | 3.314813 | 3.235820 |
| 0.00074 | 4.436463 | 4.319994 | 4.244887 | 0.999335 | 1.002449 | 1.006356 | 3.433188 | 3.314288 | 3.235300 |
| 0.00087 | 4.436250 | 4.319850 | 4.244751 | 0.999175 | 1.002308 | 1.006235 | 3.432389 | 3.313763 | 3.234781 |
| 0.00100 | 4.436046 | 4.319654 | 4.244611 | 0.999055 | 1.002188 | 1.006094 | 3.431589 | 3.312975 | 3.234262 |
| 0.00112 | 4.435902 | 4.319515 | 4.244475 | 0.998935 | 1.002068 | 1.005973 | 3.431057 | 3.312450 | 3.233742 |
| 0.00124 | 4.435834 | 4.319441 | 4.244403 | 0.998895 | 1.001987 | 1.005892 | 3.430790 | 3.312187 | 3.233482 |
| 0.00149 | 4.435625 | 4.319236 | 4.244267 | 0.998755 | 1.001827 | 1.005772 | 3.429991 | 3.311400 | 3.232963 |
| 0.00175 | 4.435472 | 4.319084 | 4.244127 | 0.998595 | 1.001646 | 1.005631 | 3.429458 | 3.310875 | 3.232443 |
| 0.00200 | 4.435268 | 4.318883 | 4.243991 | 0.998475 | 1.001506 | 1.005510 | 3.428659 | 3.310087 | 3.231924 |
| 0.00225 | 4.435119 | 4.318735 | 4.243855 | 0.998335 | 1.001345 | 1.005389 | 3.428126 | 3.309562 | 3.231405 |
| 0.00248 | 4.434915 | 4.318587 | 4.243715 | 0.998215 | 1.001185 | 1.005248 | 3.427326 | 3.309037 | 3.230885 |
|  |  |  |  |  |  |  |  |  |  |
| *α*PMZ = 0.4 | | | | | | | | | |
| 0.00000 | 4.437586 | 4.320891 | 4.245758 | 1.000135 | 1.003191 | 1.007081 | 3.437451 | 3.317700 | 3.238677 |
| 0.00016 | 4.437382 | 4.320761 | 4.245630 | 1.000015 | 1.003111 | 1.007000 | 3.436652 | 3.317175 | 3.238157 |
| 0.00049 | 4.436906 | 4.320429 | 4.245312 | 0.999735 | 1.002890 | 1.006799 | 3.434787 | 3.315863 | 3.236859 |
| 0.00082 | 4.436499 | 4.320103 | 4.244993 | 0.999495 | 1.002690 | 1.006597 | 3.433188 | 3.314550 | 3.235560 |
| 0.00098 | 4.436290 | 4.319915 | 4.244862 | 0.999355 | 1.002609 | 1.006497 | 3.432389 | 3.313763 | 3.235041 |
| 0.00115 | 4.436023 | 4.319719 | 4.244675 | 0.999215 | 1.002489 | 1.006396 | 3.431323 | 3.312975 | 3.234262 |
| 0.00132 | 4.435819 | 4.319527 | 4.244488 | 0.999095 | 1.002389 | 1.006295 | 3.430524 | 3.312187 | 3.233482 |
| 0.00147 | 4.435746 | 4.319458 | 4.244361 | 0.999035 | 1.002328 | 1.006215 | 3.430257 | 3.311925 | 3.232963 |
| 0.00164 | 4.435615 | 4.319388 | 4.244293 | 0.998975 | 1.002268 | 1.006154 | 3.429724 | 3.311662 | 3.232703 |
| 0.00197 | 4.435407 | 4.319196 | 4.244161 | 0.998835 | 1.002168 | 1.006054 | 3.428925 | 3.310875 | 3.232184 |
| 0.00230 | 4.435198 | 4.319057 | 4.244026 | 0.998695 | 1.002048 | 1.005933 | 3.428126 | 3.310350 | 3.231664 |
| 0.00263 | 4.434995 | 4.318918 | 4.243894 | 0.998575 | 1.001927 | 1.005832 | 3.427326 | 3.309825 | 3.231145 |
| 0.00296 | 4.434786 | 4.318726 | 4.243758 | 0.998435 | 1.001827 | 1.005711 | 3.426527 | 3.309037 | 3.230625 |
| 0.00328 | 4.434583 | 4.318587 | 4.243627 | 0.998315 | 1.001706 | 1.005610 | 3.425728 | 3.308512 | 3.230106 |
|  |  |  |  |  |  |  |  |  |  |
| *α*PMZ = 0.6 | | | | | | | | | |
| 0.00000 | 4.437586 | 4.320891 | 4.245758 | 1.000135 | 1.003191 | 1.007081 | 3.437451 | 3.317700 | 3.238677 |
| 0.00024 | 4.437351 | 4.320665 | 4.245609 | 0.999875 | 1.002930 | 1.006900 | 3.436652 | 3.316913 | 3.238157 |
| 0.00072 | 4.436767 | 4.320273 | 4.245303 | 0.999375 | 1.002429 | 1.006497 | 3.434520 | 3.315600 | 3.237118 |
| 0.00120 | 4.436238 | 4.319772 | 4.244992 | 0.998855 | 1.001947 | 1.006074 | 3.432655 | 3.313763 | 3.236080 |
| 0.00144 | 4.435953 | 4.319594 | 4.244835 | 0.998635 | 1.001646 | 1.005852 | 3.431589 | 3.313238 | 3.235560 |
| 0.00168 | 4.435668 | 4.319376 | 4.244627 | 0.998415 | 1.001426 | 1.005651 | 3.430524 | 3.312450 | 3.234781 |
| 0.00193 | 4.435433 | 4.319145 | 4.244474 | 0.998155 | 1.001145 | 1.005449 | 3.429724 | 3.311662 | 3.234262 |
| 0.00216 | 4.435284 | 4.318997 | 4.244325 | 0.998015 | 1.000984 | 1.005268 | 3.429192 | 3.311137 | 3.233742 |
| 0.00240 | 4.435130 | 4.318845 | 4.244245 | 0.997855 | 1.000804 | 1.005147 | 3.428659 | 3.310612 | 3.233482 |
| 0.00288 | 4.434823 | 4.318545 | 4.244037 | 0.997535 | 1.000462 | 1.004946 | 3.427593 | 3.309562 | 3.232703 |
| 0.00337 | 4.434511 | 4.318249 | 4.243820 | 0.997195 | 1.000141 | 1.004704 | 3.426527 | 3.308512 | 3.231924 |
| 0.00385 | 4.434213 | 4.318001 | 4.243603 | 0.996915 | 0.999780 | 1.004462 | 3.425461 | 3.307725 | 3.231145 |
| 0.00433 | 4.433902 | 4.317705 | 4.243391 | 0.996575 | 0.999459 | 1.004241 | 3.424396 | 3.306675 | 3.230366 |
| 0.00480 | 4.433599 | 4.317405 | 4.243179 | 0.996274 | 0.999118 | 1.004019 | 3.423330 | 3.305625 | 3.229587 |
|  |  |  |  |  |  |  |  |  |  |
| *α*PMZ = 0.8 | | | | | | | | | |
| 0.00000 | 4.437586 | 4.320891 | 4.245758 | 1.000135 | 1.003191 | 1.007081 | 3.437451 | 3.317700 | 3.238677 |
| 0.00045 | 4.436939 | 4.320369 | 4.245379 | 0.999615 | 1.002609 | 1.006597 | 3.435053 | 3.315863 | 3.237378 |
| 0.00136 | 4.435659 | 4.319393 | 4.244614 | 0.998375 | 1.001506 | 1.005590 | 3.430524 | 3.312450 | 3.234781 |
| 0.00225 | 4.434384 | 4.318418 | 4.243845 | 0.997155 | 1.000402 | 1.004563 | 3.425994 | 3.309037 | 3.232184 |
| 0.00270 | 4.433720 | 4.317909 | 4.243429 | 0.996555 | 0.999881 | 1.004160 | 3.423596 | 3.307200 | 3.230625 |
| 0.00315 | 4.433137 | 4.317452 | 4.243030 | 0.996054 | 0.999339 | 1.003576 | 3.421465 | 3.305625 | 3.229327 |
| 0.00361 | 4.432744 | 4.317061 | 4.242584 | 0.995614 | 0.998837 | 1.003032 | 3.420132 | 3.304312 | 3.227769 |
| 0.00405 | 4.432310 | 4.316691 | 4.242333 | 0.995254 | 0.998436 | 1.002629 | 3.418534 | 3.302999 | 3.226989 |
| 0.00450 | 4.431854 | 4.316373 | 4.241981 | 0.994794 | 0.998015 | 1.002267 | 3.416935 | 3.301949 | 3.225691 |
| 0.00540 | 4.431032 | 4.315647 | 4.241387 | 0.994014 | 0.997272 | 1.001542 | 3.414004 | 3.299324 | 3.223613 |
| 0.00631 | 4.430075 | 4.314899 | 4.240835 | 0.993154 | 0.996430 | 1.000756 | 3.410541 | 3.296699 | 3.221795 |
| 0.00721 | 4.429249 | 4.314282 | 4.240232 | 0.992354 | 0.995667 | 0.999991 | 3.407610 | 3.294599 | 3.219717 |
| 0.00812 | 4.428424 | 4.313599 | 4.239647 | 0.991554 | 0.994865 | 0.999306 | 3.404679 | 3.292236 | 3.217639 |
| 0.00901 | 4.427589 | 4.312869 | 4.239045 | 0.990714 | 0.994102 | 0.998541 | 3.401748 | 3.289611 | 3.215562 |
|  |  |  |  |  |  |  |  |  |  |
| *m*B = 0.10 **mol·kg−1** GG | | | | | | | | | |
| *α*PMZ = 0.2 | | | | | | | | | |
| 0.00000 | 4.398987 | 4.285373 | 4.212518 | 0.997335 | 1.000411 | 1.004302 | 3.401652 | 3.284962 | 3.208216 |
| 0.00012 | 4.398791 | 4.285145 | 4.212392 | 0.997156 | 1.000271 | 1.004132 | 3.401386 | 3.284570 | 3.208086 |
| 0.00037 | 4.398449 | 4.284706 | 4.212088 | 0.996777 | 1.000031 | 1.003800 | 3.400988 | 3.283784 | 3.207698 |
| 0.00062 | 4.398062 | 4.284318 | 4.211852 | 0.996428 | 0.999781 | 1.003499 | 3.400456 | 3.283130 | 3.207439 |
| 0.00074 | 4.397879 | 4.284090 | 4.211671 | 0.996278 | 0.999641 | 1.003328 | 3.400191 | 3.282737 | 3.207180 |
| 0.00087 | 4.397692 | 4.283870 | 4.211549 | 0.996118 | 0.999521 | 1.003168 | 3.399925 | 3.282344 | 3.207050 |
| 0.00100 | 4.397488 | 4.283642 | 4.211431 | 0.995919 | 0.999381 | 1.003017 | 3.399659 | 3.281952 | 3.206921 |
| 0.00112 | 4.397390 | 4.283431 | 4.211318 | 0.995829 | 0.999281 | 1.002876 | 3.399527 | 3.281559 | 3.206791 |
| 0.00124 | 4.397305 | 4.283341 | 4.211221 | 0.995769 | 0.999201 | 1.002776 | 3.399394 | 3.281428 | 3.206661 |
| 0.00149 | 4.397164 | 4.283108 | 4.211090 | 0.995580 | 0.999051 | 1.002595 | 3.399261 | 3.281035 | 3.206532 |
| 0.00175 | 4.396968 | 4.282859 | 4.210905 | 0.995400 | 0.998861 | 1.002414 | 3.398995 | 3.280643 | 3.206273 |
| 0.00200 | 4.396777 | 4.282614 | 4.210766 | 0.995231 | 0.998680 | 1.002213 | 3.398730 | 3.280250 | 3.206143 |
| 0.00225 | 4.396590 | 4.282381 | 4.210639 | 0.995071 | 0.998530 | 1.002043 | 3.398464 | 3.279857 | 3.206014 |
| 0.00248 | 4.396457 | 4.282149 | 4.210463 | 0.994902 | 0.998380 | 1.001882 | 3.398331 | 3.279464 | 3.205755 |
|  |  |  |  |  |  |  |  |  |  |
| *α*PMZ = 0.4 | | | | | | | | | |
| 0.00000 | 4.398987 | 4.285373 | 4.212518 | 0.997335 | 1.000411 | 1.004302 | 3.401652 | 3.284962 | 3.208216 |
| 0.00016 | 4.398898 | 4.285292 | 4.212438 | 0.997265 | 1.000351 | 1.004242 | 3.401519 | 3.284831 | 3.208086 |
| 0.00049 | 4.398657 | 4.285115 | 4.212274 | 0.997116 | 1.000201 | 1.004112 | 3.401121 | 3.284570 | 3.207827 |
| 0.00082 | 4.398411 | 4.284947 | 4.212056 | 0.996956 | 1.000071 | 1.003981 | 3.400722 | 3.284308 | 3.207439 |
| 0.00098 | 4.398268 | 4.284861 | 4.211976 | 0.996896 | 1.000001 | 1.003921 | 3.400456 | 3.284177 | 3.207309 |
| 0.00115 | 4.398112 | 4.284779 | 4.211891 | 0.996807 | 0.999941 | 1.003850 | 3.400191 | 3.284046 | 3.207180 |
| 0.00132 | 4.398027 | 4.284689 | 4.211807 | 0.996747 | 0.999861 | 1.003780 | 3.400058 | 3.283915 | 3.207050 |
| 0.00147 | 4.397951 | 4.284616 | 4.211732 | 0.996707 | 0.999821 | 1.003730 | 3.399925 | 3.283784 | 3.206921 |
| 0.00164 | 4.397871 | 4.284603 | 4.211664 | 0.996657 | 0.999791 | 1.003700 | 3.399792 | 3.283784 | 3.206791 |
| 0.00197 | 4.397773 | 4.284508 | 4.211572 | 0.996567 | 0.999701 | 1.003609 | 3.399659 | 3.283653 | 3.206661 |
| 0.00230 | 4.397612 | 4.284418 | 4.211483 | 0.996467 | 0.999621 | 1.003529 | 3.399394 | 3.283522 | 3.206532 |
| 0.00263 | 4.397514 | 4.284327 | 4.211395 | 0.996378 | 0.999541 | 1.003449 | 3.399261 | 3.283391 | 3.206402 |
| 0.00296 | 4.397362 | 4.284233 | 4.211302 | 0.996298 | 0.999451 | 1.003358 | 3.398995 | 3.283261 | 3.206273 |
| 0.00328 | 4.397265 | 4.284147 | 4.211159 | 0.996208 | 0.999381 | 1.003278 | 3.398862 | 3.283130 | 3.206014 |
|  |  |  |  |  |  |  |  |  |  |
| *α*PMZ = 0.6 | | | | | | | | | |
| 0.00000 | 4.398987 | 4.285373 | 4.212518 | 0.997335 | 1.000411 | 1.004302 | 3.401652 | 3.284962 | 3.208216 |
| 0.00024 | 4.398759 | 4.285214 | 4.212367 | 0.997215 | 1.000301 | 1.004202 | 3.401253 | 3.284700 | 3.207957 |
| 0.00072 | 4.398362 | 4.284883 | 4.212047 | 0.996976 | 1.000051 | 1.003961 | 3.400589 | 3.284177 | 3.207439 |
| 0.00120 | 4.397956 | 4.284564 | 4.211727 | 0.996717 | 0.999831 | 1.003720 | 3.399925 | 3.283653 | 3.206921 |
| 0.00144 | 4.397786 | 4.284400 | 4.211572 | 0.996597 | 0.999711 | 1.003609 | 3.399659 | 3.283391 | 3.206661 |
| 0.00168 | 4.397554 | 4.284241 | 4.211408 | 0.996467 | 0.999601 | 1.003479 | 3.399261 | 3.283130 | 3.206402 |
| 0.00193 | 4.397398 | 4.284017 | 4.211252 | 0.996378 | 0.999471 | 1.003368 | 3.398995 | 3.282737 | 3.206143 |
| 0.00216 | 4.397241 | 4.283935 | 4.211172 | 0.996288 | 0.999411 | 1.003308 | 3.398730 | 3.282606 | 3.206014 |
| 0.00240 | 4.397085 | 4.283841 | 4.211092 | 0.996198 | 0.999321 | 1.003248 | 3.398464 | 3.282475 | 3.205884 |
| 0.00288 | 4.396835 | 4.283612 | 4.210882 | 0.996029 | 0.999181 | 1.003137 | 3.398066 | 3.282082 | 3.205496 |
| 0.00337 | 4.396523 | 4.283376 | 4.210731 | 0.995849 | 0.999021 | 1.003037 | 3.397534 | 3.281690 | 3.205237 |
| 0.00385 | 4.396219 | 4.283087 | 4.210575 | 0.995690 | 0.998871 | 1.002927 | 3.397003 | 3.281166 | 3.204978 |
| 0.00433 | 4.395907 | 4.282851 | 4.210361 | 0.995510 | 0.998710 | 1.002806 | 3.396472 | 3.280773 | 3.204589 |
| 0.00480 | 4.395653 | 4.282614 | 4.210209 | 0.995330 | 0.998550 | 1.002706 | 3.396073 | 3.280381 | 3.204330 |
|  |  |  |  |  |  |  |  |  |  |
| *α*PMZ = 0.8 | | | | | | | | | |
| 0.00000 | 4.398987 | 4.285373 | 4.212518 | 0.997335 | 1.000411 | 1.004302 | 3.401652 | 3.284962 | 3.208216 |
| 0.00045 | 4.398518 | 4.284969 | 4.212177 | 0.997066 | 1.000121 | 1.004011 | 3.400855 | 3.284308 | 3.207698 |
| 0.00136 | 4.397474 | 4.284112 | 4.211416 | 0.996418 | 0.999561 | 1.003368 | 3.399128 | 3.282868 | 3.206532 |
| 0.00225 | 4.396443 | 4.283169 | 4.210600 | 0.995799 | 0.998931 | 1.002726 | 3.397401 | 3.281297 | 3.205237 |
| 0.00270 | 4.395965 | 4.282765 | 4.210250 | 0.995510 | 0.998640 | 1.002414 | 3.396604 | 3.280643 | 3.204719 |
| 0.00315 | 4.395475 | 4.282360 | 4.209893 | 0.995191 | 0.998350 | 1.002083 | 3.395807 | 3.279988 | 3.204200 |
| 0.00361 | 4.395091 | 4.282055 | 4.209586 | 0.994981 | 0.998160 | 1.001872 | 3.395143 | 3.279464 | 3.203682 |
| 0.00405 | 4.394761 | 4.281792 | 4.209346 | 0.994762 | 0.997940 | 1.001691 | 3.394612 | 3.279072 | 3.203294 |
| 0.00450 | 4.394386 | 4.281543 | 4.209065 | 0.994573 | 0.997750 | 1.001541 | 3.393948 | 3.278679 | 3.202776 |
| 0.00540 | 4.393677 | 4.280979 | 4.208590 | 0.994154 | 0.997350 | 1.001189 | 3.392752 | 3.277763 | 3.201998 |
| 0.00631 | 4.392972 | 4.280420 | 4.208069 | 0.993745 | 0.996960 | 1.000858 | 3.391557 | 3.276847 | 3.201092 |
| 0.00721 | 4.392272 | 4.279913 | 4.207594 | 0.993346 | 0.996560 | 1.000506 | 3.390362 | 3.276061 | 3.200315 |
| 0.00812 | 4.391564 | 4.279350 | 4.207065 | 0.992927 | 0.996159 | 1.000155 | 3.389166 | 3.275145 | 3.199408 |
| 0.00901 | 4.390855 | 4.278787 | 4.206532 | 0.992508 | 0.995759 | 0.999793 | 3.387971 | 3.274229 | 3.198501 |
|  |  |  |  |  |  |  |  |  |  |
| *m*B = 0.025 **mol·kg−1** GGG | | | | | | | | | |
| *α*PMZ = 0.2 | | | | | | | | | |
| 0.00000 | 4.452689 | 4.335228 | 4.259488 | 1.000947 | 1.003998 | 1.007886 | 3.451742 | 3.331230 | 3.251603 |
| 0.00012 | 4.452493 | 4.335040 | 4.259360 | 1.000787 | 1.003837 | 1.007724 | 3.450141 | 3.329653 | 3.250563 |
| 0.00037 | 4.452097 | 4.334720 | 4.259105 | 1.000426 | 1.003516 | 1.007402 | 3.446940 | 3.327025 | 3.248482 |
| 0.00062 | 4.451700 | 4.334396 | 4.258853 | 1.000066 | 1.003155 | 1.007120 | 3.443739 | 3.324396 | 3.246402 |
| 0.00074 | 4.451500 | 4.334265 | 4.258725 | 0.999866 | 1.002994 | 1.006958 | 3.442138 | 3.323345 | 3.245362 |
| 0.00087 | 4.451304 | 4.334076 | 4.258597 | 0.999706 | 1.002833 | 1.006797 | 3.440537 | 3.321768 | 3.244322 |
| 0.00100 | 4.451104 | 4.333945 | 4.258469 | 0.999506 | 1.002673 | 1.006636 | 3.438936 | 3.320716 | 3.243282 |
| 0.00112 | 4.450971 | 4.333757 | 4.258341 | 0.999385 | 1.002512 | 1.006475 | 3.437869 | 3.319139 | 3.242241 |
| 0.00124 | 4.450844 | 4.333687 | 4.258218 | 0.999305 | 1.002392 | 1.006354 | 3.436802 | 3.318614 | 3.241201 |
| 0.00149 | 4.450589 | 4.333499 | 4.258035 | 0.999145 | 1.002231 | 1.006192 | 3.434668 | 3.317036 | 3.239641 |
| 0.00175 | 4.450329 | 4.333372 | 4.257907 | 0.998945 | 1.002110 | 1.006031 | 3.432533 | 3.315985 | 3.238601 |
| 0.00200 | 4.450074 | 4.333184 | 4.257728 | 0.998785 | 1.001950 | 1.005910 | 3.430399 | 3.314408 | 3.237041 |
| 0.00225 | 4.449818 | 4.332995 | 4.257545 | 0.998625 | 1.001789 | 1.005749 | 3.428265 | 3.312831 | 3.235480 |
| 0.00248 | 4.449563 | 4.332868 | 4.257421 | 0.998465 | 1.001669 | 1.005628 | 3.426131 | 3.311780 | 3.234440 |
|  |  |  |  |  |  |  |  |  |  |
| *α*PMZ = 0.4 | | | | | | | | | |
| 0.00000 | 4.452689 | 4.335228 | 4.259488 | 1.000947 | 1.003998 | 1.007886 | 3.451742 | 3.331230 | 3.251603 |
| 0.00016 | 4.452480 | 4.335022 | 4.259292 | 1.000667 | 1.003677 | 1.007603 | 3.450141 | 3.329653 | 3.250042 |
| 0.00049 | 4.451993 | 4.334615 | 4.258942 | 1.000026 | 1.003074 | 1.006918 | 3.446406 | 3.326499 | 3.247442 |
| 0.00082 | 4.451574 | 4.334151 | 4.258601 | 0.999465 | 1.002472 | 1.006313 | 3.443205 | 3.322819 | 3.244842 |
| 0.00098 | 4.451360 | 4.333946 | 4.258401 | 0.999145 | 1.002151 | 1.005991 | 3.441604 | 3.321242 | 3.243282 |
| 0.00115 | 4.451151 | 4.333744 | 4.258251 | 0.998865 | 1.001869 | 1.005628 | 3.440004 | 3.319665 | 3.242241 |
| 0.00132 | 4.450878 | 4.333539 | 4.258051 | 0.998545 | 1.001548 | 1.005306 | 3.437869 | 3.318088 | 3.240681 |
| 0.00147 | 4.450737 | 4.333337 | 4.257851 | 0.998344 | 1.001267 | 1.004983 | 3.436802 | 3.316511 | 3.239121 |
| 0.00164 | 4.450600 | 4.333206 | 4.257774 | 0.998184 | 1.001106 | 1.004781 | 3.435735 | 3.315459 | 3.238601 |
| 0.00197 | 4.450382 | 4.333005 | 4.257518 | 0.997824 | 1.000825 | 1.004459 | 3.434134 | 3.313882 | 3.236521 |
| 0.00230 | 4.450109 | 4.332742 | 4.257318 | 0.997504 | 1.000504 | 1.004136 | 3.432000 | 3.311780 | 3.234960 |
| 0.00263 | 4.449891 | 4.332537 | 4.257117 | 0.997143 | 1.000183 | 1.003814 | 3.430399 | 3.310203 | 3.233400 |
| 0.00296 | 4.449614 | 4.332331 | 4.256921 | 0.996783 | 0.999861 | 1.003532 | 3.428265 | 3.308625 | 3.231840 |
| 0.00328 | 4.449395 | 4.332130 | 4.256721 | 0.996423 | 0.999580 | 1.003209 | 3.426664 | 3.307048 | 3.230280 |
|  |  |  |  |  |  |  |  |  |  |
| *α*PMZ = 0.6 | | | | | | | | | |
| 0.00000 | 4.452689 | 4.335228 | 4.259488 | 1.000947 | 1.003998 | 1.007886 | 3.451742 | 3.331230 | 3.251603 |
| 0.00024 | 4.452339 | 4.334952 | 4.259220 | 1.000466 | 1.003556 | 1.007442 | 3.449074 | 3.329127 | 3.249522 |
| 0.00072 | 4.451556 | 4.334388 | 4.258729 | 0.999305 | 1.002552 | 1.006475 | 3.443205 | 3.324922 | 3.245882 |
| 0.00120 | 4.450792 | 4.333823 | 4.258238 | 0.998304 | 1.001548 | 1.005507 | 3.437336 | 3.320716 | 3.242241 |
| 0.00144 | 4.450442 | 4.333539 | 4.258017 | 0.997824 | 1.001026 | 1.004983 | 3.434668 | 3.318614 | 3.240681 |
| 0.00168 | 4.450074 | 4.333268 | 4.257748 | 0.997183 | 1.000624 | 1.004540 | 3.432000 | 3.316511 | 3.238601 |
| 0.00193 | 4.449660 | 4.332988 | 4.257530 | 0.996663 | 1.000143 | 1.004056 | 3.428798 | 3.314408 | 3.237041 |
| 0.00216 | 4.449459 | 4.332773 | 4.257322 | 0.996463 | 0.999741 | 1.003653 | 3.427198 | 3.312831 | 3.235480 |
| 0.00240 | 4.449241 | 4.332568 | 4.257177 | 0.996102 | 0.999420 | 1.003330 | 3.425597 | 3.311254 | 3.234440 |
| 0.00288 | 4.448818 | 4.332218 | 4.256895 | 0.995502 | 0.998817 | 1.002766 | 3.422396 | 3.308625 | 3.232360 |
| 0.00337 | 4.448387 | 4.331864 | 4.256618 | 0.994821 | 0.998175 | 1.002242 | 3.419194 | 3.305997 | 3.230280 |
| 0.00385 | 4.447964 | 4.331514 | 4.256337 | 0.994221 | 0.997572 | 1.001677 | 3.415993 | 3.303369 | 3.228199 |
| 0.00433 | 4.447542 | 4.331160 | 4.256060 | 0.993620 | 0.996930 | 1.001153 | 3.412791 | 3.300740 | 3.226119 |
| 0.00480 | 4.447119 | 4.330815 | 4.255778 | 0.993019 | 0.996368 | 1.000589 | 3.409590 | 3.298112 | 3.224039 |
|  |  |  |  |  |  |  |  |  |  |
| *α*PMZ = 0.8 | | | | | | | | | |
| 0.00000 | 4.452689 | 4.335228 | 4.259488 | 1.000947 | 1.003998 | 1.007886 | 3.451742 | 3.331230 | 3.251603 |
| 0.00045 | 4.451948 | 4.334747 | 4.259036 | 0.999626 | 1.002713 | 1.006757 | 3.446406 | 3.328076 | 3.248482 |
| 0.00136 | 4.450568 | 4.333658 | 4.258093 | 0.996823 | 1.000022 | 1.004136 | 3.436802 | 3.320716 | 3.242241 |
| 0.00225 | 4.449096 | 4.332574 | 4.257171 | 0.994261 | 0.997372 | 1.001717 | 3.426131 | 3.313357 | 3.236001 |
| 0.00270 | 4.448415 | 4.332041 | 4.256723 | 0.992939 | 0.996127 | 1.000629 | 3.421328 | 3.309677 | 3.232880 |
| 0.00315 | 4.447761 | 4.331437 | 4.256203 | 0.991858 | 0.994761 | 0.999379 | 3.416526 | 3.305471 | 3.229240 |
| 0.00361 | 4.447439 | 4.330922 | 4.255729 | 0.991098 | 0.993677 | 0.998049 | 3.414392 | 3.301791 | 3.226119 |
| 0.00405 | 4.447063 | 4.330625 | 4.255269 | 0.990377 | 0.993034 | 0.996839 | 3.411724 | 3.299689 | 3.222999 |
| 0.00450 | 4.446682 | 4.330380 | 4.255098 | 0.989616 | 0.992352 | 0.996275 | 3.409056 | 3.298112 | 3.221959 |
| 0.00540 | 4.445920 | 4.329786 | 4.254638 | 0.988095 | 0.991066 | 0.995065 | 3.403720 | 3.293906 | 3.218838 |
| 0.00631 | 4.445117 | 4.329196 | 4.254241 | 0.986733 | 0.989821 | 0.993937 | 3.397851 | 3.289701 | 3.216238 |
| 0.00721 | 4.444414 | 4.328602 | 4.253845 | 0.985212 | 0.988536 | 0.992808 | 3.393049 | 3.285495 | 3.213637 |
| 0.00812 | 4.443717 | 4.328000 | 4.253440 | 0.983731 | 0.987171 | 0.991598 | 3.388247 | 3.281290 | 3.211037 |
| 0.00901 | 4.443019 | 4.327415 | 4.253035 | 0.982249 | 0.985966 | 0.990389 | 3.383445 | 3.277084 | 3.208437 |
|  |  |  |  |  |  |  |  |  |  |
| *m*B = 0.05 **mol·kg−1** GGG | | | | | | | | | |
| *α*PMZ = 0.2 | | | | | | | | | |
| 0.00000 | 4.430102 | 4.314670 | 4.240190 | 0.999127 | 1.002194 | 1.006087 | 3.430975 | 3.312476 | 3.234104 |
| 0.00012 | 4.429872 | 4.314453 | 4.239978 | 0.998887 | 1.001973 | 1.005865 | 3.430176 | 3.311689 | 3.233325 |
| 0.00037 | 4.429390 | 4.313953 | 4.239486 | 0.998307 | 1.001492 | 1.005362 | 3.428578 | 3.309852 | 3.231507 |
| 0.00062 | 4.428857 | 4.313457 | 4.239050 | 0.997768 | 1.001031 | 1.004859 | 3.426714 | 3.308014 | 3.229949 |
| 0.00074 | 4.428614 | 4.313240 | 4.238778 | 0.997468 | 1.000811 | 1.004618 | 3.425915 | 3.307227 | 3.228910 |
| 0.00087 | 4.428380 | 4.313018 | 4.238558 | 0.997208 | 1.000570 | 1.004356 | 3.425116 | 3.306440 | 3.228131 |
| 0.00100 | 4.428078 | 4.312735 | 4.238282 | 0.996909 | 1.000310 | 1.004095 | 3.424050 | 3.305390 | 3.227092 |
| 0.00112 | 4.427920 | 4.312522 | 4.238125 | 0.996729 | 1.000109 | 1.003873 | 3.423518 | 3.304602 | 3.226573 |
| 0.00124 | 4.427771 | 4.312436 | 4.237977 | 0.996589 | 0.999969 | 1.003692 | 3.422985 | 3.304340 | 3.226054 |
| 0.00149 | 4.427473 | 4.312136 | 4.237706 | 0.996309 | 0.999628 | 1.003451 | 3.421919 | 3.303290 | 3.225015 |
| 0.00175 | 4.427121 | 4.311897 | 4.237481 | 0.996049 | 0.999307 | 1.003169 | 3.420588 | 3.302503 | 3.224236 |
| 0.00200 | 4.426882 | 4.311662 | 4.237265 | 0.995770 | 0.999007 | 1.002928 | 3.419789 | 3.301715 | 3.223457 |
| 0.00225 | 4.426585 | 4.311358 | 4.237040 | 0.995490 | 0.998646 | 1.002646 | 3.418723 | 3.300666 | 3.222678 |
| 0.00248 | 4.426287 | 4.311133 | 4.236769 | 0.995210 | 0.998385 | 1.002405 | 3.417658 | 3.299878 | 3.221639 |
|  |  |  |  |  |  |  |  |  |  |
| *α*PMZ = 0.4 | | | | | | | | | |
| 0.00000 | 4.430102 | 4.314670 | 4.240190 | 0.999127 | 1.002194 | 1.006087 | 3.430975 | 3.312476 | 3.234104 |
| 0.00016 | 4.429809 | 4.314431 | 4.239966 | 0.998867 | 1.001873 | 1.005805 | 3.429910 | 3.311689 | 3.233325 |
| 0.00049 | 4.429191 | 4.313883 | 4.239444 | 0.998208 | 1.001172 | 1.005161 | 3.427779 | 3.309852 | 3.231507 |
| 0.00082 | 4.428573 | 4.313336 | 4.238973 | 0.997548 | 1.000470 | 1.004497 | 3.425648 | 3.308014 | 3.229949 |
| 0.00098 | 4.428271 | 4.313036 | 4.238739 | 0.997248 | 1.000129 | 1.004175 | 3.424583 | 3.306965 | 3.229170 |
| 0.00115 | 4.427960 | 4.312784 | 4.238506 | 0.996909 | 0.999748 | 1.003853 | 3.423518 | 3.306177 | 3.228391 |
| 0.00132 | 4.427653 | 4.312489 | 4.238273 | 0.996589 | 0.999428 | 1.003531 | 3.422452 | 3.305127 | 3.227612 |
| 0.00147 | 4.427491 | 4.312324 | 4.238048 | 0.996389 | 0.999187 | 1.003250 | 3.421919 | 3.304602 | 3.226833 |
| 0.00164 | 4.427329 | 4.312172 | 4.237955 | 0.996189 | 0.999007 | 1.003069 | 3.421387 | 3.304078 | 3.226573 |
| 0.00197 | 4.426937 | 4.311928 | 4.237717 | 0.995750 | 0.998666 | 1.002726 | 3.420055 | 3.303290 | 3.225794 |
| 0.00230 | 4.426608 | 4.311620 | 4.237475 | 0.995330 | 0.998285 | 1.002364 | 3.418990 | 3.302240 | 3.225015 |
| 0.00263 | 4.426284 | 4.311381 | 4.237238 | 0.994930 | 0.997965 | 1.002022 | 3.417924 | 3.301453 | 3.224236 |
| 0.00296 | 4.425947 | 4.311077 | 4.237051 | 0.994471 | 0.997604 | 1.001660 | 3.416859 | 3.300403 | 3.223716 |
| 0.00328 | 4.425559 | 4.310834 | 4.236814 | 0.994051 | 0.997263 | 1.001318 | 3.415527 | 3.299616 | 3.222937 |
|  |  |  |  |  |  |  |  |  |  |
| *α*PMZ = 0.6 | | | | | | | | | |
| 0.00000 | 4.430102 | 4.314670 | 4.240190 | 0.999127 | 1.002194 | 1.006087 | 3.430975 | 3.312476 | 3.234104 |
| 0.00024 | 4.429592 | 4.314235 | 4.239876 | 0.998687 | 1.001753 | 1.005644 | 3.429111 | 3.310901 | 3.233065 |
| 0.00072 | 4.428549 | 4.313357 | 4.239185 | 0.997708 | 1.000831 | 1.004719 | 3.425382 | 3.307752 | 3.230728 |
| 0.00120 | 4.427507 | 4.312536 | 4.238438 | 0.996729 | 0.999909 | 1.003793 | 3.421653 | 3.304865 | 3.228131 |
| 0.00144 | 4.427047 | 4.312101 | 4.238120 | 0.996249 | 0.999468 | 1.003330 | 3.420055 | 3.303290 | 3.227092 |
| 0.00168 | 4.426470 | 4.311667 | 4.237743 | 0.995770 | 0.999027 | 1.002847 | 3.417924 | 3.301715 | 3.225794 |
| 0.00193 | 4.426150 | 4.311280 | 4.237429 | 0.995390 | 0.998546 | 1.002405 | 3.416859 | 3.300403 | 3.224755 |
| 0.00216 | 4.425916 | 4.311054 | 4.237132 | 0.995130 | 0.998285 | 1.002042 | 3.416060 | 3.299616 | 3.223716 |
| 0.00240 | 4.425677 | 4.310829 | 4.236975 | 0.994851 | 0.998025 | 1.001821 | 3.415261 | 3.298828 | 3.223197 |
| 0.00288 | 4.425145 | 4.310377 | 4.236547 | 0.994311 | 0.997504 | 1.001358 | 3.413396 | 3.297254 | 3.221639 |
| 0.00337 | 4.424668 | 4.309921 | 4.236174 | 0.993751 | 0.996962 | 1.000895 | 3.411798 | 3.295679 | 3.220341 |
| 0.00385 | 4.424182 | 4.309509 | 4.235747 | 0.993152 | 0.996361 | 1.000433 | 3.410200 | 3.294367 | 3.218783 |
| 0.00433 | 4.423660 | 4.309066 | 4.235365 | 0.992652 | 0.995880 | 0.999930 | 3.408335 | 3.292792 | 3.217484 |
| 0.00480 | 4.423183 | 4.308676 | 4.235001 | 0.992093 | 0.995379 | 0.999507 | 3.406737 | 3.291480 | 3.216186 |
|  |  |  |  |  |  |  |  |  |  |
| *α*PMZ = 0.8 | | | | | | | | | |
| 0.00000 | 4.430102 | 4.314670 | 4.240190 | 0.999127 | 1.002194 | 1.006087 | 3.430975 | 3.312476 | 3.234104 |
| 0.00045 | 4.429340 | 4.314053 | 4.239656 | 0.998347 | 1.001432 | 1.005383 | 3.428312 | 3.310377 | 3.232286 |
| 0.00136 | 4.427852 | 4.312753 | 4.238544 | 0.996689 | 0.999869 | 1.003773 | 3.423251 | 3.305915 | 3.228650 |
| 0.00225 | 4.426297 | 4.311507 | 4.237454 | 0.994990 | 0.998285 | 1.002264 | 3.417924 | 3.301715 | 3.225015 |
| 0.00270 | 4.425490 | 4.310816 | 4.236907 | 0.994271 | 0.997443 | 1.001499 | 3.414994 | 3.299353 | 3.223197 |
| 0.00315 | 4.425004 | 4.310226 | 4.236242 | 0.993672 | 0.996802 | 1.000694 | 3.413396 | 3.297254 | 3.220860 |
| 0.00361 | 4.424544 | 4.309896 | 4.235903 | 0.993192 | 0.996321 | 1.000131 | 3.411798 | 3.296204 | 3.219821 |
| 0.00405 | 4.424072 | 4.309575 | 4.235635 | 0.992652 | 0.995880 | 0.999648 | 3.410200 | 3.295154 | 3.219042 |
| 0.00450 | 4.423662 | 4.309232 | 4.235313 | 0.992133 | 0.995339 | 0.999165 | 3.408868 | 3.294104 | 3.218004 |
| 0.00540 | 4.422790 | 4.308516 | 4.234737 | 0.991114 | 0.994377 | 0.998259 | 3.405938 | 3.291742 | 3.216186 |
| 0.00631 | 4.421917 | 4.307727 | 4.234156 | 0.990095 | 0.993334 | 0.997334 | 3.403008 | 3.289118 | 3.214368 |
| 0.00721 | 4.420994 | 4.307011 | 4.233521 | 0.989116 | 0.992372 | 0.996408 | 3.399812 | 3.286755 | 3.212291 |
| 0.00812 | 4.420122 | 4.306283 | 4.232877 | 0.988096 | 0.991350 | 0.995442 | 3.396882 | 3.284393 | 3.210213 |
| 0.00901 | 4.419268 | 4.305559 | 4.232352 | 0.987157 | 0.990348 | 0.994517 | 3.393952 | 3.282031 | 3.208655 |
|  |  |  |  |  |  |  |  |  |  |
| *m*B = 0.10 **mol·kg−1** GGG | | | | | | | | | |
| *α*PMZ = 0.2 | | | | | | | | | |
| 0.00000 | 4.382310 | 4.270576 | 4.198601 | 0.995152 | 0.998249 | 1.002152 | 3.387158 | 3.272327 | 3.196449 |
| 0.00012 | 4.382181 | 4.270447 | 4.198475 | 0.995122 | 0.998209 | 1.002112 | 3.386893 | 3.272065 | 3.196190 |
| 0.00037 | 4.381913 | 4.270189 | 4.198174 | 0.995042 | 0.998129 | 1.002041 | 3.386362 | 3.271542 | 3.195543 |
| 0.00062 | 4.381646 | 4.269932 | 4.197927 | 0.994963 | 0.998049 | 1.001971 | 3.385831 | 3.271019 | 3.195025 |
| 0.00074 | 4.381512 | 4.269747 | 4.197802 | 0.994923 | 0.998009 | 1.001931 | 3.385566 | 3.270626 | 3.194766 |
| 0.00087 | 4.381436 | 4.269619 | 4.197680 | 0.994883 | 0.997970 | 1.001901 | 3.385433 | 3.270365 | 3.194507 |
| 0.00100 | 4.381303 | 4.269490 | 4.197501 | 0.994843 | 0.997930 | 1.001861 | 3.385168 | 3.270103 | 3.194119 |
| 0.00112 | 4.381178 | 4.269425 | 4.197379 | 0.994823 | 0.997910 | 1.001831 | 3.384902 | 3.269972 | 3.193860 |
| 0.00124 | 4.381106 | 4.269361 | 4.197317 | 0.994793 | 0.997890 | 1.001811 | 3.384769 | 3.269841 | 3.193731 |
| 0.00149 | 4.380973 | 4.269232 | 4.197195 | 0.994754 | 0.997850 | 1.001781 | 3.384504 | 3.269580 | 3.193472 |
| 0.00175 | 4.380839 | 4.269099 | 4.197015 | 0.994714 | 0.997800 | 1.001741 | 3.384239 | 3.269318 | 3.193083 |
| 0.00200 | 4.380643 | 4.268919 | 4.196890 | 0.994664 | 0.997770 | 1.001701 | 3.383840 | 3.268926 | 3.192824 |
| 0.00225 | 4.380509 | 4.268786 | 4.196710 | 0.994624 | 0.997720 | 1.001661 | 3.383575 | 3.268664 | 3.192436 |
| 0.00248 | 4.380375 | 4.268662 | 4.196589 | 0.994584 | 0.997690 | 1.001631 | 3.383310 | 3.268402 | 3.192177 |
|  |  |  |  |  |  |  |  |  |  |
| *α*PMZ = 0.4 | | | | | | | | | |
| 0.00000 | 4.382310 | 4.270576 | 4.198601 | 0.995152 | 0.998249 | 1.002152 | 3.387158 | 3.272327 | 3.196449 |
| 0.00016 | 4.382042 | 4.270430 | 4.198463 | 0.995072 | 0.998169 | 1.002081 | 3.386628 | 3.272065 | 3.196190 |
| 0.00049 | 4.381499 | 4.270022 | 4.198128 | 0.994893 | 0.998000 | 1.001931 | 3.385566 | 3.271280 | 3.195543 |
| 0.00082 | 4.380964 | 4.269671 | 4.197789 | 0.994734 | 0.997830 | 1.001771 | 3.384504 | 3.270626 | 3.194896 |
| 0.00098 | 4.380688 | 4.269465 | 4.197651 | 0.994634 | 0.997740 | 1.001701 | 3.383973 | 3.270234 | 3.194637 |
| 0.00115 | 4.380420 | 4.269315 | 4.197454 | 0.994555 | 0.997650 | 1.001620 | 3.383442 | 3.269972 | 3.194248 |
| 0.00132 | 4.380215 | 4.269113 | 4.197316 | 0.994485 | 0.997570 | 1.001550 | 3.383044 | 3.269580 | 3.193989 |
| 0.00147 | 4.380077 | 4.268984 | 4.197182 | 0.994435 | 0.997530 | 1.001490 | 3.382779 | 3.269318 | 3.193731 |
| 0.00164 | 4.379939 | 4.268856 | 4.197111 | 0.994385 | 0.997490 | 1.001450 | 3.382513 | 3.269056 | 3.193601 |
| 0.00197 | 4.379605 | 4.268650 | 4.196914 | 0.994286 | 0.997401 | 1.001370 | 3.381850 | 3.268664 | 3.193213 |
| 0.00230 | 4.379329 | 4.268448 | 4.196718 | 0.994186 | 0.997321 | 1.001290 | 3.381319 | 3.268271 | 3.192824 |
| 0.00263 | 4.378995 | 4.268247 | 4.196521 | 0.994087 | 0.997241 | 1.001210 | 3.380655 | 3.267879 | 3.192436 |
| 0.00296 | 4.378724 | 4.268041 | 4.196374 | 0.993997 | 0.997151 | 1.001119 | 3.380124 | 3.267487 | 3.192177 |
| 0.00328 | 4.378448 | 4.267839 | 4.196178 | 0.993898 | 0.997071 | 1.001039 | 3.379593 | 3.267094 | 3.191789 |
|  |  |  |  |  |  |  |  |  |  |
| *α*PMZ = 0.6 | | | | | | | | | |
| 0.00000 | 4.382310 | 4.270576 | 4.198601 | 0.995152 | 0.998249 | 1.002152 | 3.387158 | 3.272327 | 3.196449 |
| 0.00024 | 4.381874 | 4.270276 | 4.198379 | 0.994953 | 0.998069 | 1.002011 | 3.386362 | 3.271803 | 3.196061 |
| 0.00072 | 4.380989 | 4.269671 | 4.197805 | 0.994525 | 0.997700 | 1.001681 | 3.384769 | 3.270757 | 3.195025 |
| 0.00120 | 4.380149 | 4.269062 | 4.197294 | 0.994067 | 0.997321 | 1.001370 | 3.383310 | 3.269710 | 3.194119 |
| 0.00144 | 4.379713 | 4.268758 | 4.196993 | 0.993868 | 0.997131 | 1.001170 | 3.382513 | 3.269187 | 3.193601 |
| 0.00168 | 4.379273 | 4.268462 | 4.196717 | 0.993659 | 0.996961 | 1.001029 | 3.381717 | 3.268664 | 3.193083 |
| 0.00193 | 4.379059 | 4.268179 | 4.196487 | 0.993569 | 0.996822 | 1.000869 | 3.381319 | 3.268141 | 3.192695 |
| 0.00216 | 4.378859 | 4.268029 | 4.196298 | 0.993510 | 0.996732 | 1.000809 | 3.380921 | 3.267879 | 3.192307 |
| 0.00240 | 4.378695 | 4.267884 | 4.196115 | 0.993400 | 0.996652 | 1.000759 | 3.380655 | 3.267617 | 3.191918 |
| 0.00288 | 4.378272 | 4.267532 | 4.195838 | 0.993231 | 0.996482 | 1.000618 | 3.379859 | 3.266963 | 3.191400 |
| 0.00337 | 4.377841 | 4.267185 | 4.195512 | 0.993042 | 0.996322 | 1.000488 | 3.379062 | 3.266309 | 3.190753 |
| 0.00385 | 4.377481 | 4.266889 | 4.195195 | 0.992883 | 0.996153 | 1.000378 | 3.378399 | 3.265786 | 3.190106 |
| 0.00433 | 4.377054 | 4.266542 | 4.194873 | 0.992704 | 0.995993 | 1.000258 | 3.377603 | 3.265132 | 3.189459 |
| 0.00480 | 4.376631 | 4.266187 | 4.194542 | 0.992534 | 0.995813 | 1.000117 | 3.376806 | 3.264478 | 3.188811 |
|  |  |  |  |  |  |  |  |  |  |
| *α*PMZ = 0.8 | | | | | | | | | |
| 0.00000 | 4.382310 | 4.270576 | 4.198601 | 0.995152 | 0.998249 | 1.002152 | 3.387158 | 3.272327 | 3.196449 |
| 0.00045 | 4.381678 | 4.270113 | 4.198165 | 0.994903 | 0.997950 | 1.001891 | 3.385964 | 3.271542 | 3.195672 |
| 0.00136 | 4.380419 | 4.269071 | 4.197328 | 0.994286 | 0.997341 | 1.001320 | 3.383708 | 3.269710 | 3.194248 |
| 0.00225 | 4.379049 | 4.268085 | 4.196390 | 0.993679 | 0.996732 | 1.000769 | 3.381186 | 3.268010 | 3.192565 |
| 0.00270 | 4.378471 | 4.267618 | 4.195942 | 0.993420 | 0.996422 | 1.000478 | 3.380124 | 3.267225 | 3.191789 |
| 0.00315 | 4.378147 | 4.267194 | 4.195545 | 0.993211 | 0.996213 | 1.000177 | 3.379593 | 3.266440 | 3.191141 |
| 0.00361 | 4.377770 | 4.266894 | 4.195323 | 0.993012 | 0.996033 | 1.000037 | 3.378930 | 3.265917 | 3.190753 |
| 0.00405 | 4.377396 | 4.266603 | 4.195089 | 0.992823 | 0.995873 | 0.999867 | 3.378266 | 3.265394 | 3.190365 |
| 0.00450 | 4.377081 | 4.266307 | 4.194859 | 0.992634 | 0.995704 | 0.999706 | 3.377735 | 3.264870 | 3.189976 |
| 0.00540 | 4.376398 | 4.265712 | 4.194398 | 0.992266 | 0.995354 | 0.999386 | 3.376541 | 3.263824 | 3.189200 |
| 0.00631 | 4.375710 | 4.265134 | 4.193930 | 0.991888 | 0.995045 | 0.999045 | 3.375346 | 3.262777 | 3.188423 |
| 0.00721 | 4.375027 | 4.264543 | 4.193478 | 0.991519 | 0.994705 | 0.998744 | 3.374152 | 3.261731 | 3.187646 |
| 0.00812 | 4.374281 | 4.263948 | 4.193014 | 0.991141 | 0.994356 | 0.998414 | 3.372825 | 3.260684 | 3.186869 |
| 0.00901 | 4.373589 | 4.263362 | 4.192604 | 0.990753 | 0.994026 | 0.998083 | 3.371630 | 3.259638 | 3.186222 |

*m*A, molality of mixed (PMZ + CTAB) system. *m*B, molalities of glycine, glycylglycine and glycylglycylglycine.

**Standard uncertainties: u(*T*) = 0.20 K, u(*m*) = 0.04 mol·kg-1, u(*α*) = 0.26, u (*κ*s) = 0.002 m·s2·kg-**1, **u (*φ*v) = 0.001 m3·mol-1**, **u(*φ*κ) = 0.003 m·s2·kg-1 (0.95 level of confidence).**

**Table S8**

Hydrodynamic diameter (*D*H) values for PMZ and CTAB, and their mixtures in water and in glycine(aq), glycylglycine(aq) and glycylglycylglycine(aq) solutions at 298.15 K.

| *D*H (nm) | | | | | | | | | | |
| --- | --- | --- | --- | --- | --- | --- | --- | --- | --- | --- |
|  |  | G | | | GG | | | GGG | | |
| *α*PMZ | ***m*B (mol·kg-1)** = 0.00 | 0.025 | 0.05 | 0.10 | 0.025 | 0.05 | 0.10 | 0.025 | 0.05 | 0.10 |
| 1.0 | 0.62 | 0.72 | 0.83 | 0.96 | 0.72 | 0.83 | 0.96 | 0.62 | 0.72 | 0.96 |
| 0.8 | 2.01 | 0.62 | 0.72 | 0.83 | 2.01 | 2.33 | 4.85 | 0.83 | 0.96 | 1.50 |
| 0.6 | 2.33 | 4.19 | 4.85 | 5.62 | 5.62 | 4.19 | 5.62 | 1.29 | 2.01 | 2.70 |
| 0.4 | 3.62 | 4.19 | 4.85 | 5.62 | 4.85 | 6.50 | 7.53 | 2.70 | 3.62 | 5.62 |
| 0.2 | 4.19 | 4.85 | 5.62 | 4.85 | 2.33 | 3.12 | 1.12 | 1.50 | 0.96 | 0.72 |
| 0.0 | 6.50 | 5.62 | 4.85 | 4.19 | 4.19 | 3.62 | 1.50 | 3.12 | 2.70 | 1.29 |

***m*B, molalities of glycine, glycylglycine and glycylglycylglycine.**

**Standard uncertainties: u(*T*) = 0.20 K, u(*m*) = 0.04 mol·kg-1, u(*α*) = 0.26, u(*D*H) = 2.22 nm (0.95 level of confidence).**

**Table S9**

Chemical shifts (*δ*) values of protons of PMZ, CTAB and mixed system (PMZ + CTAB) in water and in glycine(aq), glycylglycine(aq) and glycylglycylglycine(aq) solutions.

|  |  |  |  |  | *δ (*ppm) |  |  |  |  |  |  |
| --- | --- | --- | --- | --- | --- | --- | --- | --- | --- | --- | --- |
|  |  |  |  |  | aqueous |  |  |  |  |  |  |
|  | Ha | Hb | Hc | Hd | aromatic | Ha’ | Hb’ | Hc’ | Hd’ | He’ | Hf’ |
| PMZ | 2.528 | 2.935-2.920 | 1.931 | - | 7.047-7.033 |  |  |  |  |  |  |
| CTAB |  |  |  |  |  | 3.078 | 3.320 | 1.679 | 1.274 | 1.1947 | 0.763-0.789 |
| PMZ+CTAB | 2.593 | - | - | - | 7.013 | 2.874 | 3.034 | 1.009 | 1.373 | 1.224 | 0.824-0.854 |
|  |  |  |  |  | G |  |  |  |  |  |  |
| PMZ | 2.503 | 2.909-2.893 | 1.919 | 3.757 | 7.095-6.782 |  |  |  |  |  |  |
| CTAB |  |  |  |  |  | 3.078 | 3.318 | 1.676 | 1.279 | 1.196 | 0.761-0.790 |
| PMZ+CTAB | 2.575 | - | - | - | 7.044 | 2.834 | 3.007 | 0.965 | 1.236 | - | 0.838-0.870 |
|  |  |  |  |  | GG |  |  |  |  |  |  |
| PMZ | 2.525 | 2.933-2.918 | 1.935 | - | 7.031 |  |  |  |  |  |  |
| CTAB |  |  |  |  |  | 3.078 | 3.315 | 1.678 | 1.279 | 1.198 | 0.777 |
| PMZ+CTAB | 2.575 | - | - | - | 6.920-7.030 | 2.848 | 3.010 | 0.979 | 1.282 | 1.999 | 0.850 |
|  |  |  |  |  | GGG |  |  |  |  |  |  |
| PMZ | 2.522 | 2.926 | - | - | 7.025 |  |  |  |  |  |  |
| CTAB |  |  |  |  |  | 3.078 | 3.314 | 1.680 | 1.279 | 1.196 | 0.763-0.777 |
| PMZ+CTAB | 2.583 | - | - | - | 6.995 | 2.865 | 3.021 | 0.997 | **1.359** | 1.223 | 0.825-0.840 |

‘-’ The peaks of these protons merge due to mixed micellization.

(a)

(b)

**Figure S1.** (a) Density (*ρ*) and (b) Sound velocity (*u*) *vs* concentration of mixed (PMZ + CTAB) system at mole fraction, *α*PMZ = 0.2 in 0.025 **mol·kg-1** glycylglycine(aq) solution, at *T* = 298.15 K.

(a)

(b)

Figure S2. Structure and labeling of protons in (a) Promazine hydrochloride and (b) Cetyltrimethylammonium bromide.
